# Supplementary material for: The Association Between Acylcarnitine Metabolites and Cardiovascular Disease in Chinese Patients With Type 2 Diabetes Mellitus
Source: Front Endocrinol (Lausanne). 2020 May 5;11:212. doi: 10.3389/fendo.2020.00212 (PMC7214635; doi:10.3389/fendo.2020.00212)
Supplement: Supplementary file 1 [file Data_Sheet_1.CSV]

obs	age	T2DM	WEIGHT	HEIGHT	BMI2	YEARSDM	SBP	DBP	CHD	STROKE	HEARTFAILURE	Acarbose	Metformin	sulfonylureas	thiazolidinediones	glinides	INSULINUSE	STATINS	fibrates	Other_JZ	ACEI	ARB	CCB	Diuretics	Beta_blockers	C2	C3	C4	C4_OH	C4DC	C5	C5_OH	C5DC	C5_1	C6	C8	C10	C12	C14	C14_OH	C14DC	C16	C16_1_OH	C18	C20	C22	C24	C26	C14_1
4269308	75	1	86	160	34	30	199	90	0	0	0	1	1	0	0	0	1	1	0	0	1	0	1	0	0	20.23	1.93	0.36	0.32	0.75	0.17	0.15	0.22	0.06	0.08	0.23	0.39	0.11	0.09	0.05	0.10	1.25	0.11	0.70	0.06	0.09	0.06	0.06	0.29
4414598	46	1	54	158	22	7	195	97	0	0	0	0	0	0	0	0	1	1	0	0	1	0	0	1	0	8.98	0.64	0.09	0.07	0.56	0.04	0.11	0.04	0.04	0.02	0.02	0.03	0.02	0.03	0.05	0.06	0.59	0.05	0.44	0.05	0.13	0.04	0.04	0.03
4388419	50	1	59	158	24	1	125	70	0	0	0	0	0	0	0	0	1	0	0	0	0	1	1	0	0	7.09	0.84	0.16	0.05	0.65	0.12	0.22	0.06	0.03	0.05	0.06	0.09	0.12	0.12	0.03	0.02	0.86	0.04	0.40	0.03	0.10	0.07	0.02	0.14
4409468	39	1	80	178	25	12	199	99	0	1	0	0	0	0	0	0	1	1	0	0	1	1	1	1	0	10.85	0.98	0.21	0.09	1.11	0.10	0.13	0.11	0.07	0.06	0.08	0.11	0.06	0.09	0.05	0.04	1.04	0.07	0.68	0.05	0.13	0.07	0.05	0.14
4432007	63	1	75	158	30	8	190	100	1	0	0	0	0	0	0	0	1	1	0	0	0	0	1	1	1	19.33	1.26	0.64	0.15	0.69	0.18	0.24	0.27	0.13	0.10	0.17	0.20	0.10	0.10	0.07	0.03	1.01	0.05	0.36	0.04	0.09	0.05	0.02	0.30
4456315	64	1	55	160	21	0	130	67	0	0	0	0	0	0	0	0	1	1	0	0	0	0	1	0	0	6.62	0.99	0.17	0.14	0.64	0.11	0.25	0.03	0.06	0.05	0.05	0.10	0.04	0.06	0.08	0.02	0.79	0.04	0.39	0.03	0.05	0.05	0.02	0.11
4439097	63	1	67	160	26	26	184	78	0	0	0	1	1	1	0	0	1	0	1	0	0	1	1	0	0	14.48	1.39	0.18	0.14	0.63	0.12	0.35	0.08	0.13	0.05	0.07	0.08	0.03	0.04	0.05	0.02	0.69	0.05	0.37	0.05	0.12	0.07	0.04	0.00
4451728	63	1	88	182	26	10	163	88	1	0	1	0	0	1	0	0	1	1	0	0	1	0	0	1	0	22.31	1.42	0.29	0.32	0.55	0.12	0.23	0.18	0.08	0.11	0.14	0.21	0.13	0.12	0.18	0.05	1.37	0.08	0.71	0.08	0.08	0.10	0.04	0.17
4408911	50	1	105	164	39	5	157	108	0	0	0	1	1	0	0	0	1	0	0	0	1	0	1	0	1	17.21	1.98	0.28	0.17	0.88	0.26	0.45	0.12	0.04	0.09	0.09	0.09	0.07	0.08	0.03	0.05	1.02	0.05	0.45	0.03	0.10	0.07	0.04	0.06
4440801	65	1	65	170	22	10	122	65	0	0	0	1	0	1	0	0	1	1	0	0	0	0	0	0	0	10.91	1.78	0.15	0.18	0.59	0.15	0.34	0.06	0.10	0.03	0.04	0.03	0.04	0.09	0.05	0.05	0.61	0.04	0.33	0.10	0.21	0.13	0.04	0.05
4213315	74	1	75	159	30	11	184	88	0	1	0	0	0	0	0	0	1	0	0	0	0	0	1	0	0	13.95	1.13	0.25	0.06	1.40	0.16	0.27	0.14	0.11	0.06	0.10	0.16	0.09	0.11	0.09	0.03	0.99	0.11	0.55	0.04	0.10	0.06	0.06	0.18
4459014	61	1	75	160	29	12	196	102	1	1	心功能III级	0	0	0	0	0	1	1	0	0	1	0	0	0	0	8.19	0.24	0.11	0.17	0.28	0.11	0.13	0.04	0.07	0.02	0.05	0.05	0.02	0.05	0.07	0.03	0.58	0.03	0.32	0.02	0.04	0.02	0.01	0.05
4390595	46	1	62	158	25	5	154	87	0	0	0	1	1	1	0	0	1	1	0	0	1	0	0	0	0	8.70	0.95	0.15	0.10	0.63	0.13	0.33	0.15	0.05	0.04	0.08	0.16	0.11	0.09	0.09	0.06	1.41	0.05	0.62	0.03	0.11	0.05	0.03	0.12
4412909	67	1	70	174	23	10	130	80	0	0	0	0	0	0	0	0	1	0	0	0	1	0	1	0	0	17.28	1.75	0.21	0.06	0.62	0.27	0.22	0.12	0.06	0.04	0.07	0.14	0.05	0.04	0.03	0.06	0.92	0.07	0.60	0.05	0.12	0.06	0.06	0.10
4451027	63	1	64	160	25	15	167	82	0	0	0	1	1	0	0	0	1	0	0	0	0	1	1	0	0	11.45	1.40	0.37	0.09	0.77	0.21	0.27	0.06	0.12	0.08	0.10	0.20	0.15	0.09	0.15	0.09	1.21	0.07	0.41	0.04	0.09	0.11	0.06	0.23
4392652	50	1	65	159	26	15	108	77	0	0	0	1	1	0	0	0	1	0	1	0	0	0	0	0	0	12.81	1.02	0.14	0.16	0.92	0.08	0.34	0.12	0.09	0.08	0.05	0.07	0.08	0.06	0.08	0.06	0.73	0.05	0.25	0.05	0.12	0.16	0.10	0.12
4413387	62	1	91	172	31	20	176	106	1	1	0	1	1	1	0	0	1	1	0	0	0	1	1	1	0	9.41	1.34	0.17	0.11	0.39	0.11	0.19	0.07	0.04	0.02	0.09	0.15	0.10	0.10	0.09	0.02	0.76	0.06	0.42	0.03	0.04	0.03	0.02	0.18
4449029	45	1	75	174	25	19	146	87	0	0	0	0	0	1	0	0	1	0	0	0	0	0	1	0	1	5.91	0.66	0.13	0.09	0.51	0.17	0.18	0.09	0.04	0.08	0.05	0.05	0.05	0.06	0.07	0.03	0.86	0.05	0.50	0.06	0.13	0.06	0.03	0.07
4388714	52	1	53	152	23	7	119	70	0	0	0	0	0	0	0	0	1	0	0	0	1	0	0	0	0	7.86	1.00	0.14	0.09	0.79	0.15	0.50	0.02	0.05	0.04	0.03	0.06	0.07	0.08	0.06	0.04	1.40	0.09	0.57	0.05	0.09	0.07	0.03	0.10
4445933	50	1	68	162	26	15	142	78	0	0	0	0	1	0	0	0	1	0	0	0	0	0	0	0	0	11.64	1.42	0.11	0.15	0.49	0.10	0.34	0.02	0.10	0.03	0.03	0.06	0.06	0.03	0.07	0.04	0.95	0.03	0.39	0.04	0.08	0.09	0.04	0.10
4024123	80	1	66	167	24	10	170	93	0	0	0	1	1	0	0	0	1	1	0	0	0	1	1	0	0	12.90	2.54	0.24	0.11	0.85	0.22	0.41	0.10	0.09	0.09	0.16	0.20	0.16	0.16	0.06	0.04	1.53	0.12	0.76	0.06	0.08	0.05	0.03	0.09
4440122	29	1	90	176	29	12	133	94	0	0	0	0	0	0	0	0	1	1	0	0	0	1	1	0	0	14.26	3.24	0.26	0.16	0.36	0.21	0.21	0.04	0.06	0.06	0.06	0.08	0.06	0.07	0.05	0.04	1.18	0.07	0.52	0.06	0.08	0.05	0.05	0.12
4347487	64	1	69	160	27	20	204	87	0	0	0	1	0	1	0	0	1	1	0	0	1	0	1	0	0	14.09	1.65	0.21	0.09	0.54	0.13	0.42	0.09	0.04	0.04	0.06	0.08	0.03	0.06	0.04	0.05	0.83	0.05	0.44	0.05	0.07	0.06	0.06	0.08
4100357	46	1	90	163	34	15	174	105	1	1	0	0	1	0	0	0	1	0	0	0	0	1	1	0	0	7.87	1.22	0.16	0.10	0.23	0.12	0.10	0.07	0.04	0.04	0.04	0.06	0.03	0.04	0.05	0.06	0.64	0.07	0.28	0.04	0.09	0.06	0.04	0.09
4387101	63	1	64	173	21	30	150	100	1	0	0	1	1	0	0	0	1	1	0	0	0	0	1	1	1	10.21	1.14	0.17	0.13	1.04	0.13	0.39	0.05	0.05	0.10	0.11	0.13	0.15	0.10	0.06	0.04	1.08	0.05	0.51	0.05	0.08	0.06	0.06	0.08
4366192	44	1	87	173	29	10	153	94	0	1	0	1	1	0	0	0	1	0	0	0	1	0	0	0	0	3.76	0.62	0.08	0.04	0.86	0.11	0.13	0.04	0.05	0.07	0.04	0.08	0.03	0.09	0.07	0.02	0.53	0.05	0.23	0.03	0.04	0.03	0.05	0.05
4441350	84	1	80	175	26	10	181	118	0	1	0	0	0	0	0	0	1	0	0	0	0	0	0	0	0	17.23	1.05	0.26	0.65	0.97	0.16	0.30	0.05	0.11	0.04	0.05	0.07	0.04	0.07	0.04	0.01	0.93	0.05	0.47	0.05	0.11	0.06	0.03	0.06
4197188	56	1	65	163	24	2	172	99	0	0	0	0	0	0	0	0	0	1	0	0	0	1	1	0	0	12.17	1.08	0.20	0.09	1.58	0.17	0.24	0.17	0.04	0.05	0.06	0.09	0.04	0.05	0.04	0.04	0.81	0.05	0.41	0.04	0.06	0.07	0.05	0.08
4454639	51	1	54	160	21	8	113	74	0	0	0	0	1	0	0	0	1	1	0	0	1	0	1	0	0	6.00	0.66	0.14	0.04	0.45	0.08	0.18	0.03	0.05	0.02	0.02	0.04	0.03	0.05	0.04	0.04	0.49	0.03	0.29	0.04	0.05	0.03	0.01	0.03
4396092	58	1	74	164	28	13	142	91	0	0	0	0	0	0	0	0	1	0	0	0	0	0	0	0	0	11.83	0.81	0.16	0.08	0.61	0.15	0.20	0.13	0.04	0.06	0.10	0.17	0.05	0.05	0.04	0.03	0.82	0.06	0.41	0.06	0.07	0.04	0.05	0.12
4459322	48	1	91	178	29	19	148	99	0	0	0	0	0	0	0	0	1	1	0	0	1	0	0	0	0	5.38	1.18	0.14	0.12	0.34	0.19	0.25	0.06	0.08	0.06	0.06	0.08	0.05	0.07	0.09	0.03	1.06	0.06	0.44	0.06	0.10	0.07	0.04	0.12
4388861	41	1	91	180	28	12	135	98	0	0	0	0	1	1	0	0	1	0	0	0	1	0	0	0	0	9.24	1.12	0.19	0.06	1.13	0.14	0.35	0.09	0.04	0.08	0.16	0.16	0.10	0.06	0.09	0.06	0.92	0.04	0.63	0.06	0.10	0.06	0.04	0.11
4394226	58	1	72	175	24	10	159	89	0	0	0	1	0	0	0	0	1	1	0	0	1	0	1	0	0	9.28	1.55	0.27	0.18	0.78	0.23	0.52	0.10	0.07	0.05	0.06	0.07	0.04	0.08	0.03	0.04	1.39	0.05	0.41	0.04	0.07	0.08	0.08	0.08
4408830	41	1	93	170	32	9	135	98	1	0	0	1	1	0	0	0	1	1	0	0	1	0	0	0	0	14.09	2.82	0.44	0.14	0.66	0.34	0.45	0.09	0.07	0.06	0.05	0.06	0.05	0.06	0.04	0.09	1.00	0.07	0.52	0.08	0.17	0.13	0.09	0.08
4387778	24	1	91	180	28	1	128	90	0	0	0	0	0	0	0	0	1	0	0	0	0	0	0	0	0	6.18	1.36	0.36	0.16	0.87	0.27	0.46	0.08	0.06	0.10	0.18	0.42	0.14	0.09	0.05	0.03	1.08	0.04	0.35	0.06	0.08	0.08	0.04	0.14
4384948	22	1	60	160	23	2	149	103	0	0	0	0	0	0	0	0	1	0	0	0	0	0	0	0	0	22.91	0.61	0.29	1.86	0.45	0.19	0.78	0.17	0.15	0.12	0.19	0.29	0.19	0.15	0.08	0.08	1.74	0.09	1.09	0.09	0.15	0.09	0.03	0.12
4424920	34	1	75	130	44	0	140	81	1	0	0	0	1	1	1	0	1	1	0	0	0	1	0	0	0	17.58	2.03	0.27	0.13	0.74	0.19	0.38	0.07	0.07	0.06	0.07	0.09	0.06	0.07	0.04	0.06	1.89	0.11	0.76	0.07	0.10	0.05	0.05	0.09
4280851	21	1	40	160	16	1	115	73	0	0	0	0	0	0	0	0	1	0	0	0	0	0	0	0	0	14.15	0.47	0.18	0.76	0.25	0.08	0.28	0.12	0.06	0.05	0.05	0.05	0.03	0.03	0.06	0.04	0.72	0.07	0.71	0.08	0.12	0.11	0.03	0.08
4393729	58	1	59	171	20	0	134	82	1	0	0	1	0	0	0	0	1	1	0	0	1	0	0	0	1	9.74	1.15	0.27	0.18	0.41	0.12	0.15	0.08	0.03	0.05	0.05	0.07	0.05	0.06	0.05	0.07	0.86	0.06	0.53	0.05	0.09	0.06	0.03	0.07
4393687	53	1	106	175	35	5	106	68	1	0	0	0	0	0	0	0	1	0	0	0	0	1	0	0	0	22.68	1.15	0.30	0.25	0.57	0.18	0.23	0.04	0.04	0.06	0.03	0.08	0.06	0.08	0.02	0.04	1.12	0.03	0.35	0.05	0.04	0.04	0.08	0.09
4418002	62	1	79	170	27	0	154	78	0	1	0	0	1	0	0	0	1	1	0	0	1	0	1	0	0	13.71	1.56	0.23	0.14	0.73	0.18	0.28	0.07	0.09	0.04	0.06	0.07	0.06	0.13	0.05	0.04	1.73	0.13	1.01	0.07	0.13	0.06	0.04	0.08
4240512	53	1	58	169	20	8	166	86	0	0	0	0	0	0	0	0	1	0	0	0	0	0	1	0	0	10.66	0.88	0.23	0.07	0.45	0.09	0.23	0.12	0.04	0.04	0.08	0.13	0.04	0.04	0.04	0.04	0.80	0.05	0.50	0.05	0.04	0.04	0.05	0.08
4446965	53	1	78	172	26	14	124	77	0	0	0	1	0	0	0	0	1	0	0	0	0	0	1	0	1	11.36	1.68	0.28	0.09	0.40	0.17	0.25	0.10	0.08	0.05	0.05	0.09	0.04	0.06	0.04	0.02	0.83	0.06	0.62	0.04	0.03	0.04	0.03	0.06
4405919	87	1	70	172	24	20	154	58	0	1	0	0	0	0	0	0	1	0	0	0	0	0	1	1	0	18.75	0.96	0.79	0.17	0.55	0.22	0.21	0.22	0.09	0.09	0.14	0.26	0.09	0.07	0.09	0.08	0.90	0.09	0.57	0.12	0.09	0.05	0.03	0.20
4418437	39	1	70	170	24	15	120	64	0	0	0	0	0	0	0	0	0	0	0	0	0	0	0	0	0	12.60	0.37	0.18	0.15	0.57	0.12	0.16	0.13	0.06	0.11	0.35	0.62	0.07	0.06	0.06	0.06	0.71	0.04	0.37	0.04	0.07	0.06	0.02	0.13
4393165	48	1	72	166	26	13	118	78	0	0	0	0	0	0	0	0	1	0	0	0	0	0	0	0	0	19.90	0.96	0.19	0.33	0.60	0.12	0.35	0.09	0.07	0.08	0.17	0.23	0.08	0.06	0.09	0.06	1.04	0.06	0.44	0.07	0.10	0.06	0.08	0.14
4396959	73	1	60	158	24	0	152	84	1	0	0	1	0	0	0	0	1	0	0	0	0	0	0	0	0	14.16	1.61	0.16	0.11	0.34	0.11	0.14	0.08	0.03	0.05	0.11	0.13	0.04	0.06	0.05	0.05	0.87	0.07	0.46	0.04	0.06	0.06	0.06	0.08
4414239	64	1	79	174	26	5	118	68	1	0	1	0	0	1	0	0	1	1	0	0	0	0	0	0	0	14.46	0.78	0.19	0.14	0.59	0.13	0.18	0.07	0.07	0.05	0.07	0.08	0.05	0.05	0.08	0.05	1.03	0.06	0.41	0.08	0.09	0.04	0.03	0.08
4441398	66	1	60	160	23	1	162	94	0	0	0	0	0	0	0	0	1	0	0	0	0	0	0	0	0	13.69	0.71	0.11	0.10	0.45	0.08	0.27	0.04	0.05	0.03	0.03	0.05	0.04	0.06	0.03	0.04	0.86	0.05	0.37	0.05	0.05	0.06	0.03	0.08
4443619	69	1	77	167	28	20	126	78	1	0	0	1	1	0	0	0	1	1	0	0	0	0	1	0	0	11.19	0.88	0.18	0.09	0.57	0.13	0.18	0.03	0.05	0.05	0.04	0.06	0.03	0.08	0.03	0.02	0.78	0.05	0.44	0.07	0.09	0.09	0.04	0.08
4392979	44	1	76	170	26	15	127	89	0	0	0	1	0	0	0	0	1	0	1	0	1	0	0	0	0	10.94	2.43	0.25	0.09	0.60	0.23	0.24	0.04	0.07	0.04	0.04	0.06	0.05	0.07	0.07	0.06	0.95	0.06	0.34	0.06	0.07	0.09	0.08	0.11
4405613	61	1	71	160	28	20	145	72	0	0	0	1	0	0	0	0	1	0	0	0	0	0	0	0	0	13.43	1.08	0.25	0.20	0.81	0.19	0.28	0.11	0.07	0.06	0.06	0.06	0.04	0.04	0.07	0.07	0.84	0.05	0.34	0.05	0.08	0.05	0.03	0.07
4391677	58	1	56	155	23	20	152	104	1	0	0	0	1	0	0	0	1	1	0	0	1	0	0	0	0	16.49	1.47	0.17	0.18	0.68	0.10	0.36	0.22	0.07	0.04	0.09	0.16	0.06	0.07	0.08	0.05	1.15	0.08	0.58	0.05	0.07	0.08	0.04	0.14
4404247	26	1	53	155	22	10	155	96	0	1	0	0	0	0	0	0	1	0	0	0	0	0	0	0	0	12.76	0.80	0.10	0.16	0.56	0.12	0.21	0.03	0.05	0.05	0.03	0.04	0.04	0.06	0.04	0.04	0.75	0.05	0.20	0.03	0.06	0.05	0.03	0.05
4449098	53	1	93	175	30	13	134	81	0	0	0	1	1	1	0	0	1	0	0	0	1	0	1	0	0	13.35	2.30	0.22	0.23	0.60	0.31	0.42	0.10	0.00	0.10	0.12	0.19	0.10	0.07	0.13	0.03	1.49	0.06	0.85	0.09	0.09	0.07	0.05	0.18
4416686	60	1	70	160	27	10	125	51	0	0	0	1	0	0	0	0	1	0	0	0	0	0	0	0	0	28.41	1.04	0.22	0.87	0.45	0.13	0.21	0.07	0.07	0.03	0.04	0.09	0.04	0.05	0.08	0.07	1.05	0.05	0.69	0.06	0.15	0.07	0.04	0.12
4416269	57	1	82	172	28	20	179	104	0	0	0	0	1	1	0	0	1	0	0	0	1	0	1	0	1	20.63	1.03	0.17	0.12	1.12	0.18	0.19	0.17	0.07	0.05	0.07	0.10	0.04	0.06	0.05	0.07	0.68	0.11	0.68	0.04	0.10	0.04	0.04	0.07
4391565	56	1	59	163	22	15	126	62	0	0	0	0	0	0	0	0	1	1	0	0	1	0	0	0	0	11.22	1.38	0.20	0.07	0.36	0.17	0.18	0.09	0.05	0.04	0.07	0.11	0.06	0.07	0.05	0.02	0.81	0.03	0.47	0.04	0.08	0.08	0.05	0.10
4394320	49	1	76	170	26	7	159	119	0	0	0	1	0	1	0	0	1	1	1	0	1	0	0	0	0	11.99	1.74	0.32	0.12	0.69	0.22	0.34	0.13	0.07	0.08	0.12	0.18	0.07	0.06	0.06	0.08	1.11	0.04	0.39	0.08	0.05	0.08	0.06	0.10
4405201	70	1	87	171	30	11	162	92	1	1	0	1	1	0	0	0	1	0	0	0	0	1	1	0	0	8.99	0.72	0.12	0.07	0.34	0.09	0.21	0.07	0.05	0.06	0.07	0.12	0.06	0.05	0.06	0.04	1.10	0.07	0.47	0.13	0.06	0.06	0.03	0.11
4385277	49	1	76	175	25	0	118	78	1	0	0	1	1	0	0	0	1	1	0	0	1	0	0	0	1	5.54	1.21	0.13	0.11	0.55	0.11	0.59	0.06	0.05	0.11	0.15	0.27	0.15	0.11	0.02	0.03	0.83	0.03	0.38	0.02	0.08	0.07	0.03	0.10
4429006	56	1	62	157	25	10	166	94	0	1	0	1	1	1	0	0	1	1	0	0	0	0	0	0	0	9.04	0.70	0.10	0.05	0.73	0.28	0.18	0.06	0.04	0.03	0.05	0.07	0.05	0.07	0.02	0.04	0.58	0.03	0.21	0.04	0.05	0.04	0.02	0.05
4385827	63	1	68	160	27	13	111	72	0	0	0	0	1	0	0	0	1	1	0	0	1	0	0	0	0	10.15	2.18	0.36	0.13	0.48	0.31	0.47	0.13	0.11	0.13	0.07	0.15	0.12	0.17	0.07	0.05	1.28	0.09	0.79	0.06	0.05	0.07	0.05	0.08
4416245	81	1	50	165	18	10	178	80	0	1	0	0	1	1	0	0	1	0	0	0	0	0	1	0	0	16.17	0.87	0.16	0.11	1.00	0.13	0.16	0.14	0.07	0.04	0.10	0.12	0.06	0.07	0.07	0.07	0.84	0.06	0.73	0.04	0.10	0.04	0.04	0.15
4382337	69	1	45	161	17	20	220	110	0	1	0	0	1	1	0	0	1	0	0	0	0	1	1	0	0	7.34	0.63	0.38	0.08	0.63	0.17	0.25	0.07	0.04	0.06	0.08	0.08	0.06	0.05	0.05	0.01	0.41	0.02	0.28	0.02	0.05	0.02	0.01	0.06
4428620	34	1	97	185	28	0	120	70	0	0	0	0	1	0	0	0	1	1	0	0	0	0	0	0	0	15.96	2.93	0.28	0.13	1.05	0.20	0.51	0.07	0.09	0.04	0.06	0.07	0.10	0.09	0.05	0.04	1.61	0.10	0.85	0.08	0.10	0.06	0.04	0.12
4418257	59	1	90	172	30	6	138	75	0	1	0	0	0	0	0	0	1	0	0	0	1	0	1	0	0	15.53	1.73	0.20	0.13	0.86	0.22	0.39	0.14	0.09	0.06	0.16	0.23	0.09	0.07	0.07	0.08	1.15	0.07	0.63	0.06	0.10	0.10	0.07	0.14
4462957	76	1	70	178	22	20	148	77	1	1	0	0	0	0	0	0	1	1	0	0	0	0	1	0	0	11.52	2.33	0.20	0.07	0.41	0.10	0.23	0.07	0.09	0.04	0.05	0.08	0.03	0.06	0.07	0.04	0.68	0.05	0.37	0.04	0.04	0.04	0.03	0.12
4276570	71	1	65	170	22	30	137	78	0	0	0	1	0	0	0	0	1	0	0	0	0	0	0	0	0	8.63	0.96	0.14	0.09	0.52	0.11	0.13	0.13	0.04	0.05	0.08	0.08	0.05	0.06	0.06	0.05	0.69	0.03	0.48	0.05	0.06	0.05	0.03	0.12
4445824	39	1	89	162	34	0	127	99	0	0	0	1	1	0	0	0	1	0	0	0	1	0	0	0	0	12.17	0.91	0.16	0.18	0.50	0.11	0.38	0.04	0.08	0.04	0.04	0.10	0.06	0.06	0.10	0.03	1.09	0.04	0.41	0.03	0.05	0.03	0.02	0.10
4461245	28	1	65	170	22	5	118	89	0	0	0	0	0	0	0	0	1	0	0	0	0	0	0	0	0	4.25	0.65	0.14	0.03	0.22	0.06	0.13	0.04	0.03	0.03	0.02	0.03	0.03	0.06	0.05	0.03	0.61	0.04	0.31	0.03	0.04	0.03	0.01	0.07
4458509	64	1	80	155	33	5	124	74	1	1	0	1	1	0	0	0	1	1	0	0	0	0	0	0	0	3.88	0.37	0.13	0.04	0.40	0.12	0.09	0.00	0.05	0.04	0.03	0.07	0.04	0.06	0.04	0.02	0.45	0.02	0.18	0.02	0.05	0.03	0.01	0.06
4394954	60	1	85	173	28	12	135	68	0	0	0	1	0	0	0	0	1	1	0	0	0	1	0	0	0	20.32	2.63	0.43	0.11	0.73	0.23	0.35	0.25	0.09	0.09	0.14	0.18	0.06	0.06	0.07	0.08	0.80	0.05	0.39	0.06	0.09	0.09	0.08	0.15
4397325	78	1	50	173	17	19	133	51	0	1	0	0	0	0	0	0	1	0	0	0	0	0	0	0	0	4.34	0.50	0.05	0.05	0.28	0.05	0.06	0.07	0.02	0.04	0.03	0.05	0.04	0.05	0.03	0.04	0.66	0.05	0.40	0.04	0.04	0.03	0.03	0.08
4060353	59	1	80	180	25	11	136	80	1	0	0	0	0	0	0	0	1	1	0	0	0	0	1	0	0	17.86	1.69	0.28	0.11	0.53	0.13	0.30	0.11	0.06	0.06	0.12	0.15	0.04	0.05	0.06	0.05	0.94	0.05	0.51	0.06	0.09	0.07	0.06	0.11
4396314	68	1	80	165	29	0	143	85	1	1	0	0	0	0	0	0	1	0	1	0	0	0	0	0	0	14.47	1.99	0.32	0.14	0.64	0.23	0.26	0.24	0.07	0.11	0.19	0.21	0.07	0.07	0.06	0.06	0.60	0.04	0.23	0.04	0.09	0.06	0.07	0.13
4460067	68	1	70	165	26	0	134	95	0	0	心功能III级	0	0	0	0	0	1	0	0	0	0	0	0	0	0	7.93	0.75	0.06	0.10	0.33	0.09	0.16	0.01	0.05	0.03	0.03	0.03	0.08	0.06	0.07	0.02	0.98	0.04	0.39	0.03	0.06	0.06	0.03	0.09
4392699	54	1	71	161	27	18	162	86	0	1	0	1	1	0	0	0	1	1	0	0	1	0	1	0	0	14.30	0.96	0.20	0.14	0.67	0.09	0.26	0.09	0.07	0.08	0.25	0.38	0.12	0.06	0.05	0.06	0.71	0.05	0.46	0.06	0.12	0.11	0.06	0.31
4387506	82	1	50	170	17	1	142	77	0	1	0	0	1	0	0	0	1	0	0	0	0	0	0	0	0	4.71	0.91	0.23	0.09	0.53	0.13	0.30	0.10	0.07	0.05	0.13	0.26	0.18	0.19	0.10	0.04	0.81	0.06	0.48	0.06	0.06	0.07	0.03	0.24
4442056	52	1	84	176	27	10	141	70	0	1	0	0	0	0	0	0	1	0	0	0	1	0	1	0	0	13.78	1.56	0.28	0.09	0.74	0.14	0.17	0.05	0.05	0.04	0.05	0.05	0.03	0.05	0.06	0.04	0.65	0.04	0.56	0.10	0.08	0.09	0.04	0.07
4388553	43	1	75	178	24	4	123	97	0	0	0	0	0	0	0	0	1	1	0	0	1	0	0	0	0	8.00	0.88	0.25	0.07	0.56	0.28	0.39	0.06	0.04	0.07	0.13	0.21	0.10	0.11	0.08	0.06	0.77	0.04	0.42	0.07	0.05	0.10	0.04	0.06
4396146	54	1	60	157	24	10	197	104	0	0	0	0	0	0	0	0	1	0	0	0	1	0	0	0	0	5.33	0.92	0.18	0.06	0.32	0.22	0.17	0.09	0.05	0.05	0.07	0.07	0.03	0.05	0.04	0.05	0.70	0.05	0.39	0.05	0.06	0.09	0.06	0.08
4419486	79	1	50	155	21	20	188	68	0	0	0	0	0	0	0	0	1	0	0	0	0	0	1	0	0	22.77	1.14	0.23	0.28	0.87	0.08	0.15	0.10	0.05	0.14	0.45	0.43	0.10	0.07	0.04	0.06	1.59	0.07	0.65	0.04	0.07	0.04	0.04	0.15
4409666	47	1	85	163	32	15	121	90	1	0	0	0	0	0	0	0	1	1	0	0	0	0	1	0	0	5.85	0.94	0.16	0.06	0.21	0.11	0.14	0.03	0.00	0.03	0.03	0.06	0.05	0.07	0.07	0.02	0.94	0.05	0.39	0.04	0.05	0.05	0.02	0.10
4463659	86	1	75	170	26	10	160	100	1	1	心功能III级	0	0	0	0	0	1	1	0	0	1	0	0	1	1	11.25	1.79	0.21	0.05	0.54	0.09	0.18	0.03	0.00	0.06	0.05	0.04	0.02	0.05	0.04	0.02	1.03	0.07	0.60	0.06	0.06	0.04	0.04	0.08
4456202	60	1	83	170	29	0	125	74	0	0	0	0	1	0	0	0	1	1	0	0	0	0	0	0	0	5.78	0.70	0.12	0.07	0.44	0.15	0.19	0.05	0.02	0.03	0.04	0.06	0.06	0.05	0.04	0.02	0.60	0.02	0.36	0.05	0.06	0.05	0.02	0.06
4387617	67	1	58	162	22	15	132	71	0	0	0	1	1	1	0	0	1	1	0	0	1	0	1	0	0	5.03	0.73	0.14	0.08	0.75	0.15	0.38	0.06	0.07	0.06	0.05	0.09	0.05	0.12	0.05	0.03	0.66	0.03	0.32	0.06	0.06	0.11	0.05	0.06
4424750	56	1	50	160	20	0	87	59	0	0	0	1	0	0	0	0	1	0	0	0	0	0	0	0	0	10.57	0.51	0.13	0.07	0.90	0.29	0.17	0.05	0.06	0.04	0.04	0.11	0.04	0.03	0.03	0.05	0.80	0.05	0.59	0.05	0.07	0.05	0.04	0.07
4381761	62	1	60	167	22	0	117	80	0	1	0	0	0	0	0	0	1	0	0	0	0	0	0	0	0	14.82	2.34	0.45	0.25	0.74	0.16	0.59	0.10	0.04	0.12	0.11	0.31	0.10	0.17	0.10	0.05	1.17	0.08	0.54	0.06	0.05	0.06	0.03	0.14
4444662	59	1	98	165	36	0	158	100	0	0	0	0	0	0	0	0	1	0	0	0	0	1	1	0	0	15.14	2.17	0.21	0.10	0.49	0.13	0.21	0.06	0.06	0.04	0.08	0.09	0.04	0.08	0.04	0.03	0.91	0.04	0.38	0.04	0.05	0.04	0.03	0.09
4393072	45	1	82	170	28	0	150	100	0	0	0	0	0	0	0	0	1	0	0	0	0	0	0	0	0	10.40	2.06	0.28	0.11	0.75	0.17	0.31	0.15	0.04	0.04	0.06	0.08	0.08	0.09	0.12	0.07	1.09	0.07	0.57	0.05	0.14	0.13	0.10	0.11
4376408	68	1	78	166	28	20	118	66	0	0	0	0	0	0	0	0	1	1	0	0	1	1	1	0	0	9.84	1.20	0.38	0.08	0.45	0.15	0.24	0.10	0.05	0.05	0.03	0.05	0.03	0.04	0.05	0.05	0.84	0.07	0.37	0.05	0.08	0.05	0.05	0.08
4395693	19	1	100	180	31	0	136	64	0	0	0	0	1	0	0	0	1	1	0	0	0	0	0	0	0	25.70	1.35	0.41	1.43	0.49	0.22	0.37	0.38	0.20	0.11	0.19	0.25	0.07	0.07	0.09	0.09	1.07	0.08	0.33	0.07	0.08	0.08	0.05	0.14
4431586	77	1	48	154	20	23	124	54	1	0	0	0	0	1	0	0	1	1	0	0	1	0	1	1	0	10.17	1.03	0.18	0.08	0.88	0.12	0.20	0.10	0.06	0.04	0.09	0.10	0.07	0.04	0.04	0.04	0.62	0.05	0.32	0.04	0.07	0.05	0.02	0.13
4434911	38	1	77	170	27	0	111	92	0	0	0	1	1	0	0	0	1	0	0	0	0	0	0	0	0	9.59	2.08	0.22	0.08	0.38	0.21	0.29	0.04	0.10	0.02	0.03	0.03	0.02	0.03	0.02	0.02	0.66	0.04	0.38	0.03	0.07	0.04	0.03	0.03
4459897	55	1	70	180	22	15	168	104	1	0	0	0	0	0	0	0	1	1	0	0	0	1	1	0	0	7.03	0.95	0.16	0.04	1.02	0.11	0.18	0.05	0.06	0.04	0.05	0.05	0.06	0.06	0.03	0.05	0.64	0.05	0.25	0.03	0.03	0.03	0.02	0.07
4381571	71	1	66	170	23	0	165	79	0	1	0	0	1	0	0	0	1	0	0	0	0	0	0	0	0	5.18	1.29	0.15	0.05	0.69	0.09	0.30	0.04	0.03	0.05	0.03	0.07	0.06	0.04	0.05	0.04	0.58	0.03	0.30	0.04	0.03	0.03	0.03	0.06
4396793	72	1	61	160	24	5	150	90	0	0	0	1	0	0	0	0	1	1	0	0	0	1	0	0	0	11.96	1.84	0.14	0.11	0.55	0.13	0.24	0.09	0.05	0.04	0.05	0.06	0.04	0.05	0.05	0.04	1.15	0.05	0.33	0.04	0.06	0.07	0.06	0.07
4433858	58	1	61	173	20	10	158	83	0	1	0	0	1	0	0	0	1	0	0	0	0	0	0	0	0	15.57	1.10	0.15	0.16	0.34	0.08	0.17	0.09	0.06	0.05	0.09	0.15	0.06	0.10	0.07	0.03	1.57	0.08	0.81	0.07	0.05	0.08	0.04	0.13
4429227	63	1	84	162	32	0	190	85	0	0	0	0	1	0	0	0	1	0	0	0	0	1	0	0	0	6.69	1.13	0.21	0.08	0.92	0.15	0.22	0.08	0.05	0.03	0.04	0.07	0.05	0.05	0.03	0.04	0.54	0.03	0.30	0.04	0.07	0.07	0.02	0.13
4386558	64	1	68	163	26	20	145	86	0	0	0	0	1	0	0	0	1	1	0	0	0	1	0	0	0	6.61	0.97	0.27	0.11	0.61	0.12	0.46	0.10	0.05	0.07	0.14	0.25	0.14	0.07	0.06	0.04	0.80	0.04	0.36	0.06	0.05	0.04	0.04	0.13
4390078	79	1	60	162	23	2	166	85	0	0	0	1	0	0	0	0	1	0	0	0	1	0	0	0	0	15.78	1.73	0.36	0.13	1.16	0.23	0.45	0.13	0.09	0.06	0.08	0.07	0.07	0.08	0.04	0.06	1.20	0.05	0.64	0.06	0.08	0.07	0.06	0.11
4444857	61	1	60	152	26	13	130	70	1	0	0	1	1	1	0	0	1	1	0	0	0	0	0	0	0	8.28	1.13	0.20	0.08	0.87	0.08	0.20	0.05	0.00	0.03	0.03	0.00	0.02	0.04	0.05	0.03	0.72	0.05	0.35	0.03	0.06	0.04	0.02	0.04
4175651	84	1	60	167	22	0	138	71	0	0	0	0	0	0	0	0	0	0	0	0	0	0	0	0	0	7.15	1.09	0.14	0.09	0.54	0.09	0.25	0.15	0.05	0.07	0.09	0.14	0.07	0.10	0.04	0.02	0.93	0.06	0.38	0.03	0.10	0.05	0.04	0.12
4135900	62	1	78	169	27	10	136	74	0	0	0	0	1	0	0	0	1	0	0	0	0	0	0	0	0	4.82	1.02	0.17	0.05	0.69	0.10	0.17	0.05	0.04	0.10	0.06	0.19	0.07	0.09	0.04	0.02	0.80	0.05	0.35	0.03	0.06	0.07	0.05	0.10
4393272	50	1	57	152	25	9	138	100	0	0	0	1	0	0	0	0	0	1	0	0	0	0	1	0	0	7.31	1.01	0.11	0.09	0.80	0.18	0.24	0.12	0.05	0.05	0.06	0.08	0.05	0.08	0.06	0.04	0.79	0.04	0.19	0.04	0.13	0.08	0.05	0.08
4386099	72	1	72	172	24	0	130	85	0	0	0	1	1	0	0	0	1	0	0	0	0	0	0	0	0	12.01	2.51	0.31	0.18	0.64	0.22	0.54	0.24	0.13	0.16	0.35	0.57	0.28	0.15	0.11	0.06	1.17	0.13	0.66	0.06	0.08	0.10	0.07	0.21
4405822	71	1	80	165	29	0	164	84	1	0	1	0	0	1	0	0	1	0	0	0	0	1	1	1	0	11.95	1.76	0.28	0.16	0.75	0.27	0.26	0.20	0.05	0.09	0.15	0.25	0.05	0.05	0.06	0.09	1.16	0.07	0.49	0.03	0.14	0.08	0.04	0.07
4412101	49	1	69	162	26	0	130	70	0	0	0	0	1	0	0	0	1	0	0	0	0	0	0	0	0	13.63	2.30	0.24	0.18	1.00	0.20	0.35	0.05	0.06	0.04	0.05	0.05	0.03	0.06	0.04	0.09	1.10	0.04	0.53	0.04	0.14	0.06	0.05	0.06
4446856	75	1	64	156	26	0	134	66	0	1	0	1	0	0	0	0	1	1	0	0	0	0	0	0	0	10.21	1.04	0.12	0.07	0.76	0.13	0.16	0.06	0.06	0.05	0.03	0.05	0.04	0.06	0.07	0.05	0.59	0.08	0.29	0.15	0.05	0.03	0.03	0.09
4409723	68	1	70	165	26	0	140	79	0	0	0	0	1	0	0	0	1	0	0	0	0	0	0	0	0	14.98	0.71	0.42	0.22	0.43	0.19	0.16	0.25	0.05	0.13	0.24	0.22	0.06	0.07	0.08	0.04	0.36	0.04	0.17	0.02	0.10	0.05	0.04	0.11
4426168	33	1	75	160	29	7	143	98	0	0	0	0	1	0	0	0	1	1	0	0	0	0	0	0	0	7.11	0.46	0.32	0.20	0.54	0.12	0.28	0.09	0.09	0.03	0.04	0.06	0.07	0.07	0.05	0.07	1.05	0.12	0.68	0.06	0.10	0.05	0.03	0.10
4451750	62	1	80	158	32	8	186	88	0	0	0	1	1	0	0	0	1	1	0	0	0	1	0	0	0	11.54	1.43	0.24	0.09	0.59	0.21	0.21	0.03	0.05	0.02	0.05	0.08	0.04	0.04	0.10	0.03	1.20	0.05	0.32	0.03	0.05	0.03	0.02	0.06
4391653	75	1	51	152	22	0	172	66	0	0	0	1	0	1	0	0	1	0	1	0	1	0	0	0	0	15.70	1.44	0.27	0.09	0.65	0.20	0.26	0.13	0.06	0.06	0.10	0.12	0.05	0.08	0.06	0.04	0.92	0.07	0.42	0.04	0.06	0.04	0.03	0.12
4460495	85	1	78	173	26	11	130	56	1	1	0	0	0	0	0	0	0	1	0	0	1	0	1	0	0	7.96	0.67	0.46	0.06	0.63	0.11	0.26	0.07	0.06	0.12	0.12	0.14	0.12	0.07	0.11	0.03	0.90	0.05	0.41	0.02	0.06	0.03	0.02	0.28
4424600	62	1	50	153	21	0	138	87	0	0	0	1	0	0	0	0	1	1	0	0	0	0	0	0	0	8.41	1.01	0.20	0.16	0.77	0.11	0.45	0.04	0.03	0.04	0.03	0.07	0.03	0.04	0.04	0.03	0.58	0.03	0.31	0.03	0.05	0.04	0.02	0.05
4406552	59	1	53	153	23	1	193	93	0	0	0	0	0	0	0	0	1	0	0	0	0	0	1	0	0	16.70	1.57	0.22	0.08	0.77	0.11	0.24	0.11	0.04	0.05	0.08	0.13	0.04	0.04	0.06	0.05	0.77	0.05	0.35	0.04	0.08	0.08	0.05	0.13
4464254	22	1	83	168	29	8	144	72	0	0	0	0	1	0	0	0	1	0	0	0	1	0	0	0	0	6.02	1.86	0.18	0.09	0.53	0.10	0.15	0.03	0.02	0.03	0.05	0.04	0.05	0.08	0.04	0.04	0.99	0.04	0.36	0.03	0.06	0.03	0.02	0.10
4404985	48	1	92	176	30	7	160	97	0	0	0	0	1	0	0	0	1	0	0	0	0	1	0	0	0	25.77	2.54	0.54	0.46	0.71	0.32	0.51	0.20	0.10	0.07	0.07	0.11	0.05	0.10	0.08	0.07	1.34	0.14	0.61	0.09	0.18	0.10	0.05	0.13
4090707	48	1	92	168	33	10	160	92	0	0	0	0	0	0	0	0	1	1	0	0	1	0	1	0	0	17.58	1.92	0.34	0.10	0.68	0.21	0.47	0.13	0.07	0.11	0.22	0.41	0.13	0.09	0.07	0.04	1.19	0.06	0.38	0.04	0.06	0.06	0.07	0.27
4408990	76	1	50	160	20	13	138	85	0	0	0	0	0	0	0	0	1	0	0	0	0	0	0	0	0	19.29	1.16	0.40	0.43	0.40	0.29	0.24	0.13	0.05	0.08	0.18	0.21	0.06	0.07	0.06	0.09	1.30	0.09	0.89	0.04	0.10	0.06	0.04	0.13
4437335	57	1	70	172	24	3	133	74	0	0	0	1	1	0	0	0	1	1	0	0	0	1	0	0	0	7.08	0.73	0.08	0.06	0.73	0.08	0.23	0.02	0.03	0.02	0.02	0.03	0.01	0.03	0.03	0.02	0.36	0.02	0.22	0.04	0.07	0.04	0.02	0.04
4403545	36	1	70	165	26	0	130	76	0	0	0	0	1	0	0	0	1	0	0	0	0	0	0	0	0	8.74	2.40	0.17	0.10	0.51	0.11	0.28	0.08	0.07	0.04	0.02	0.04	0.04	0.07	0.05	0.04	1.05	0.09	0.43	0.04	0.08	0.06	0.04	0.06
4414540	47	1	74	164	28	26	150	95	0	0	0	0	0	0	0	0	1	0	0	0	0	0	0	0	0	18.83	1.56	0.08	0.11	0.30	0.04	0.16	0.05	0.05	0.03	0.05	0.06	0.03	0.04	0.05	0.06	0.93	0.05	0.42	0.04	0.07	0.06	0.05	0.06
4382654	51	1	72	166	26	2	126	70	0	1	0	1	1	1	0	0	1	1	0	0	0	0	1	0	0	7.39	0.96	0.22	0.15	0.57	0.19	0.40	0.05	0.08	0.04	0.05	0.05	0.12	0.14	0.06	0.03	1.26	0.07	0.46	0.03	0.08	0.10	0.07	0.08
4142208	53	1	61	162	23	14	162	73	1	0	0	0	1	0	0	0	1	0	0	0	0	0	0	0	0	13.81	1.57	0.31	0.10	0.71	0.14	0.32	0.12	0.07	0.06	0.06	0.06	0.08	0.10	0.05	0.05	1.19	0.05	0.58	0.07	0.08	0.08	0.06	0.10
4403338	44	1	89	164	33	4	113	73	0	0	0	1	1	0	0	0	1	1	0	0	0	1	0	0	0	11.01	1.38	0.19	0.14	1.52	0.16	0.30	0.11	0.07	0.06	0.25	0.34	0.08	0.04	0.06	0.09	0.89	0.08	0.46	0.04	0.17	0.11	0.08	0.12
4417404	45	1	75	178	24	8	133	74	0	0	0	1	1	0	0	0	1	1	0	0	1	0	0	0	0	12.72	1.64	0.24	0.12	0.77	0.15	0.26	0.10	0.09	0.05	0.06	0.07	0.04	0.05	0.07	0.09	1.10	0.10	0.42	0.06	0.13	0.06	0.05	0.09
4393877	51	1	70	175	23	18	160	107	0	0	0	1	1	0	0	1	1	1	0	0	1	0	1	0	1	7.52	1.59	0.21	0.16	0.60	0.14	0.31	0.11	0.06	0.03	0.04	0.05	0.05	0.07	0.03	0.05	0.92	0.03	0.34	0.04	0.05	0.04	0.04	0.11
4391362	66	1	65	165	24	19	128	66	1	1	0	0	0	0	0	0	1	1	0	0	1	0	0	1	1	8.54	0.70	0.16	0.04	0.16	0.15	0.10	0.10	0.05	0.04	0.09	0.14	0.05	0.06	0.04	0.03	1.02	0.07	0.45	0.04	0.10	0.05	0.04	0.09
4413484	52	1	80	168	28	16	131	86	1	0	0	1	1	0	0	0	1	0	0	0	0	1	0	0	0	8.72	0.76	0.15	0.08	0.59	0.13	0.21	0.09	0.06	0.04	0.06	0.08	0.04	0.03	0.05	0.06	0.74	0.05	0.35	0.04	0.12	0.05	0.03	0.10
4404169	70	1	65	165	24	10	126	91	0	1	0	1	0	0	0	0	1	1	0	0	0	0	0	0	0	20.88	2.98	0.41	0.43	0.76	0.26	0.48	0.14	0.10	0.06	0.07	0.09	0.06	0.10	0.07	0.07	1.42	0.11	0.63	0.06	0.13	0.08	0.05	0.11
4448308	60	1	90	168	32	8	111	87	0	0	0	1	1	1	0	0	1	1	0	0	0	0	0	0	0	8.67	0.85	0.15	0.06	0.80	0.10	0.18	0.05	0.06	0.05	0.08	0.09	0.07	0.06	0.10	0.03	0.72	0.04	0.33	0.06	0.07	0.05	0.03	0.12
4444093	65	1	79	178	25	0	142	83	0	0	0	1	0	0	0	0	1	1	0	0	0	0	0	0	0	6.78	1.19	0.19	0.06	0.59	0.09	0.34	0.03	0.09	0.03	0.02	0.07	0.05	0.06	0.04	0.02	1.07	0.03	0.38	0.03	0.06	0.04	0.03	0.07
4391986	50	1	80	160	31	0	98	75	0	0	0	0	0	0	0	0	1	0	0	0	0	0	0	0	0	25.05	3.91	0.32	0.52	0.50	0.17	0.19	0.19	0.05	0.10	0.09	0.10	0.08	0.08	0.09	0.04	0.89	0.03	0.25	0.04	0.07	0.07	0.04	0.21
4420464	51	1	50	158	20	0	67	53	0	1	0	0	0	0	0	0	1	0	0	0	0	0	1	1	1	8.07	0.60	0.16	0.23	0.66	0.09	0.13	0.07	0.03	0.03	0.05	0.06	0.04	0.04	0.04	0.08	1.04	0.06	0.38	0.11	0.08	0.03	0.03	0.07
4132050	61	1	65	170	22	6	128	71	0	0	0	0	0	0	0	0	1	0	0	0	0	0	1	0	0	9.43	1.45	0.14	0.07	0.40	0.07	0.20	0.08	0.04	0.05	0.08	0.14	0.05	0.06	0.04	0.04	0.72	0.06	0.37	0.05	0.08	0.07	0.06	0.08
4448054	50	1	84	165	31	0	115	90	0	0	0	1	1	0	0	0	1	1	0	0	0	0	0	0	0	5.61	0.89	0.10	0.06	0.80	0.12	0.30	0.05	0.09	0.02	0.08	0.09	0.04	0.06	0.06	0.02	0.82	0.04	0.36	0.03	0.09	0.06	0.03	0.08
4447219	69	1	61	154	26	15	153	89	0	1	0	1	1	1	0	1	1	1	0	0	0	0	1	0	0	13.63	1.59	0.15	0.08	0.72	0.10	0.20	0.06	0.08	0.04	0.04	0.07	0.06	0.07	0.05	0.05	0.84	0.07	0.43	0.05	0.10	0.06	0.04	0.07
4398179	67	1	77	176	25	0	125	78	0	0	0	1	0	0	0	1	1	1	0	0	0	0	1	0	0	9.58	1.35	0.18	0.09	0.45	0.10	0.24	0.09	0.04	0.03	0.04	0.05	0.02	0.03	0.04	0.04	0.52	0.04	0.34	0.07	0.09	0.22	0.15	0.06
4461086	46	1	83	170	29	2	120	79	0	0	0	1	1	0	0	0	1	0	0	0	0	0	0	0	0	12.69	2.69	0.18	0.15	0.50	0.14	0.41	0.00	0.05	0.03	0.03	0.07	0.03	0.06	0.08	0.03	0.84	0.05	0.46	0.07	0.08	0.07	0.03	0.08
4048730	67	1	102	167	37	2	150	70	0	0	0	1	1	0	0	0	0	1	0	0	1	0	1	0	0	9.64	0.55	0.13	0.06	0.95	0.12	0.27	0.08	0.05	0.04	0.05	0.07	0.06	0.06	0.06	0.07	0.68	0.04	0.24	0.03	0.07	0.04	0.03	0.10
4388162	79	1	65	170	22	20	114	66	1	1	0	0	0	0	0	0	1	0	0	0	0	0	0	0	0	6.15	0.95	0.16	0.07	1.00	0.19	0.46	0.08	0.02	0.08	0.10	0.26	0.15	0.08	0.07	0.03	0.89	0.05	0.38	0.05	0.11	0.03	0.04	0.12
4393514	62	1	60	167	22	0	149	93	0	0	0	1	1	0	0	0	1	0	0	0	0	0	0	0	0	12.30	0.83	0.52	0.19	5.57	0.36	0.36	0.24	0.12	0.14	0.17	0.32	0.13	0.09	0.12	0.19	0.82	0.08	0.36	0.08	0.11	0.19	0.11	0.46
4455765	55	1	68	160	27	19	166	90	0	0	0	1	1	0	0	0	1	1	0	0	1	0	1	0	0	4.23	0.37	0.11	0.06	0.35	0.09	0.22	0.04	0.03	0.02	0.03	0.03	0.05	0.06	0.05	0.03	0.61	0.04	0.44	0.06	0.07	0.04	0.02	0.05
4433655	75	1	58	160	23	10	142	96	0	0	0	1	1	0	0	0	1	1	0	0	0	0	1	0	0	7.82	0.59	0.14	0.08	0.71	0.06	0.18	0.06	0.06	0.03	0.07	0.10	0.05	0.06	0.04	0.03	0.76	0.05	0.41	0.06	0.06	0.04	0.02	0.09
4404510	30	1	75	168	27	0	136	82	0	0	0	0	1	0	0	0	1	0	0	0	0	0	0	0	0	13.48	0.59	0.16	0.27	0.73	0.08	0.47	0.10	0.05	0.03	0.05	0.07	0.04	0.05	0.06	0.03	1.30	0.07	0.62	0.05	0.10	0.04	0.04	0.08
4403169	69	1	67	160	26	8	141	102	0	0	0	0	0	1	0	0	1	1	0	0	0	0	1	0	0	18.58	1.13	0.22	0.10	0.70	0.09	0.15	0.18	0.06	0.06	0.16	0.28	0.09	0.04	0.06	0.05	0.75	0.12	0.45	0.05	0.10	0.08	0.03	0.15
4453933	57	1	54	158	22	10	115	70	0	0	0	0	1	0	0	0	1	0	0	0	0	0	0	0	0	4.30	0.39	0.05	0.03	0.25	0.04	0.14	0.00	0.00	0.01	0.01	0.02	0.03	0.04	0.04	0.02	0.61	0.04	0.23	0.02	0.02	0.02	0.01	0.02
4429383	61	1	56	156	23	20	175	60	0	0	0	0	1	1	0	0	1	1	0	0	1	0	0	0	0	13.59	1.09	0.16	0.06	0.60	0.16	0.12	0.05	0.06	0.04	0.03	0.05	0.03	0.04	0.03	0.03	0.67	0.03	0.44	0.06	0.08	0.05	0.02	0.04
4404372	70	1	61	150	27	12	181	77	1	1	0	0	0	0	0	0	1	1	0	0	0	1	1	0	0	13.30	1.01	0.24	0.09	0.39	0.07	0.18	0.15	0.06	0.06	0.07	0.13	0.04	0.05	0.04	0.05	0.69	0.05	0.22	0.03	0.06	0.04	0.03	0.09
4387137	18	1	94	183	28	0	118	75	0	0	0	0	1	0	0	0	1	0	0	0	0	0	0	0	0	7.18	1.16	0.23	0.32	0.56	0.27	0.33	0.13	0.07	0.05	0.08	0.18	0.08	0.12	0.07	0.04	1.17	0.02	0.26	0.03	0.04	0.06	0.02	0.10
4449002	64	1	68	175	22	0	140	90	0	1	0	0	0	0	0	0	1	1	0	0	0	0	0	0	0	9.46	1.41	0.21	0.11	0.82	0.23	0.42	0.15	0.23	0.13	0.13	0.34	0.11	0.10	0.08	0.02	0.84	0.04	0.38	0.04	0.07	0.04	0.03	0.20
4392334	86	1	68	180	21	10	144	71	1	1	0	0	0	0	0	0	1	0	0	0	0	0	0	0	0	10.62	0.82	0.14	0.07	0.54	0.12	0.20	0.16	0.05	0.04	0.09	0.16	0.05	0.10	0.06	0.03	0.58	0.04	0.23	0.04	0.09	0.05	0.06	0.17
4331371	68	1	65	165	24	24	85	48	0	1	0	1	1	1	0	0	1	1	0	0	0	0	0	0	0	8.71	2.55	0.26	0.08	0.65	0.46	0.20	0.11	0.06	0.03	0.04	0.06	0.04	0.05	0.06	0.06	0.57	0.06	0.28	0.05	0.09	0.15	0.04	0.09
4384078	64	1	63	173	21	20	140	74	0	1	0	1	1	1	0	0	1	1	0	0	0	0	0	0	0	9.13	0.97	0.21	0.08	0.31	0.12	0.20	0.06	0.04	0.03	0.03	0.05	0.04	0.06	0.06	0.03	0.71	0.05	0.46	0.04	0.07	0.08	0.03	0.08
4452760	26	1	78	170	27	0	166	108	0	0	0	0	0	0	0	0	1	0	0	0	0	0	0	0	0	12.18	1.42	0.10	0.12	0.34	0.16	0.23	0.04	0.00	0.03	0.04	0.09	0.08	0.07	0.06	0.02	2.33	0.06	0.93	0.06	0.09	0.06	0.03	0.10
4452026	69	1	75	162	29	20	113	74	0	0	0	0	1	0	0	0	1	0	0	0	0	0	1	0	0	11.15	1.44	0.51	0.09	0.60	0.26	0.33	0.06	0.09	0.03	0.04	0.04	0.05	0.10	0.07	0.03	0.96	0.06	0.43	0.03	0.04	0.02	0.01	0.06
4427123	50	1	64	154	27	9	151	84	0	0	0	0	0	0	0	0	1	0	0	0	0	0	0	0	1	8.45	1.03	0.11	0.05	0.94	0.09	0.24	0.04	0.08	0.04	0.03	0.03	0.04	0.06	0.06	0.03	0.82	0.04	0.32	0.06	0.08	0.04	0.02	0.08
4410194	58	1	55	154	23	0	180	87	0	0	0	1	0	0	0	0	1	0	0	0	1	0	1	0	0	14.28	2.70	0.22	0.08	0.63	0.17	0.22	0.11	0.07	0.04	0.04	0.04	0.04	0.05	0.05	0.06	1.00	0.05	0.39	0.03	0.13	0.06	0.05	0.04
4390825	31	1	95	182	29	0	107	84	0	0	0	1	1	0	0	0	1	0	0	1	0	0	0	0	0	19.22	1.21	0.25	0.37	0.63	0.15	0.23	0.12	0.11	0.06	0.16	0.30	0.12	0.15	0.09	0.06	1.54	0.06	0.47	0.06	0.05	0.08	0.03	0.30
4465542	50	1	63	164	23	14	99	68	0	1	0	0	1	0	0	0	1	0	0	0	0	0	0	0	0	4.53	0.57	0.11	0.04	0.28	0.09	0.11	0.03	0.06	0.05	0.03	0.00	0.04	0.10	0.07	0.03	0.42	0.03	0.26	0.05	0.06	0.02	0.02	0.09
4382061	70	1	51	158	20	0	126	79	0	0	0	0	0	0	0	0	1	1	0	0	0	0	0	0	0	11.87	2.25	0.28	0.22	0.33	0.19	0.26	0.11	0.06	0.06	0.09	0.12	0.08	0.08	0.06	0.05	0.86	0.06	0.51	0.05	0.11	0.07	0.08	0.11
4389298	57	1	75	170	26	5	141	102	0	0	0	0	1	0	0	0	1	0	0	0	0	0	0	0	0	12.76	1.15	0.15	0.10	0.79	0.16	0.27	0.10	0.09	0.06	0.12	0.19	0.10	0.11	0.05	0.09	0.98	0.07	0.60	0.06	0.10	0.11	0.04	0.19
4458071	71	1	90	170	31	3	150	85	0	0	0	1	0	0	0	0	1	1	0	0	1	0	0	0	0	6.38	0.74	0.10	0.09	0.59	0.21	0.17	0.05	0.08	0.04	0.05	0.07	0.06	0.07	0.10	0.03	0.82	0.05	0.33	0.05	0.08	0.04	0.03	0.10
4411655	40	1	45	155	19	0	74	44	0	0	0	0	0	0	0	0	1	0	0	0	0	0	0	0	0	18.33	0.68	0.22	0.56	0.50	0.17	0.27	0.10	0.06	0.08	0.07	0.08	0.05	0.06	0.05	0.04	0.91	0.05	0.58	0.04	0.06	0.06	0.03	0.10
4390528	56	1	57	159	23	7	140	80	0	0	0	1	1	0	0	0	1	0	0	0	0	0	0	0	0	13.27	1.33	0.24	0.09	1.00	0.18	0.71	0.11	0.05	0.04	0.06	0.09	0.06	0.11	0.05	0.03	0.77	0.04	0.39	0.04	0.06	0.06	0.03	0.08
4395855	70	1	50	158	20	1	149	80	1	0	0	1	0	0	0	0	1	1	0	0	0	0	0	0	1	11.65	1.23	0.12	0.12	0.86	0.09	0.15	0.18	0.04	0.06	0.08	0.14	0.06	0.08	0.07	0.06	0.82	0.05	0.41	0.05	0.11	0.06	0.09	0.15
4456019	60	1	89	165	33	0	155	88	0	1	0	1	1	0	0	0	1	0	0	0	1	0	0	0	0	6.80	1.17	0.12	0.08	0.33	0.12	0.21	0.03	0.07	0.06	0.10	0.12	0.06	0.07	0.07	0.02	0.80	0.04	0.38	0.03	0.06	0.04	0.02	0.17
4413339	55	1	72	165	26	0	146	90	0	0	0	1	1	1	0	0	1	1	0	0	0	0	0	0	0	8.54	0.92	0.18	0.07	0.74	0.10	0.25	0.04	0.05	0.02	0.02	0.02	0.02	0.02	0.04	0.07	0.68	0.05	0.34	0.03	0.07	0.04	0.05	0.03
4395404	74	1	65	170	22	0	166	86	0	0	0	0	0	0	0	0	1	1	0	0	1	0	0	0	0	9.84	1.06	0.14	0.09	0.39	0.09	0.12	0.07	0.05	0.04	0.05	0.10	0.03	0.04	0.03	0.05	0.69	0.05	0.28	0.06	0.08	0.11	0.06	0.09
4398186	51	1	66	163	25	13	121	87	0	0	0	1	1	0	0	0	1	1	0	0	0	0	0	0	0	7.43	0.93	0.12	0.12	0.69	0.08	0.37	0.12	0.05	0.03	0.06	0.08	0.03	0.04	0.05	0.05	0.57	0.05	0.35	0.04	0.06	0.07	0.05	0.07
4412614	57	1	80	169	28	7	132	65	0	0	0	1	1	0	0	0	1	1	0	0	0	0	1	0	0	11.20	1.31	0.23	0.13	0.50	0.15	0.29	0.14	0.06	0.05	0.07	0.06	0.06	0.05	0.03	0.06	0.72	0.07	0.34	0.03	0.11	0.05	0.04	0.08
4393909	59	1	48	156	20	2	115	65	0	0	0	1	0	0	0	0	1	1	0	0	0	0	0	0	0	7.24	1.01	0.12	0.07	0.30	0.12	0.16	0.07	0.02	0.03	0.03	0.03	0.04	0.06	0.04	0.02	0.69	0.04	0.33	0.04	0.05	0.06	0.04	0.07
4405662	82	1	69	163	26	20	133	58	0	1	0	1	0	1	0	0	1	0	0	0	0	1	1	0	0	9.36	1.61	0.20	0.10	0.25	0.12	0.18	0.10	0.04	0.06	0.05	0.10	0.05	0.07	0.03	0.04	0.83	0.06	0.31	0.03	0.08	0.04	0.04	0.10
4425462	43	1	69	168	24	5	111	66	0	0	0	0	1	1	0	0	1	0	0	0	0	0	0	0	0	11.02	1.28	0.19	0.16	0.34	0.13	0.30	0.05	0.06	0.03	0.02	0.04	0.03	0.04	0.04	0.05	0.91	0.04	0.46	0.07	0.07	0.09	0.04	0.04
4445214	56	1	79	170	27	5	171	122	1	0	0	1	0	0	0	0	1	0	0	0	0	0	1	0	0	13.05	2.38	0.26	0.10	0.78	0.20	0.37	0.07	0.08	0.04	0.06	0.09	0.04	0.08	0.05	0.05	0.85	0.10	0.63	0.06	0.06	0.07	0.04	0.08
4430747	59	1	63	168	22	20	142	73	1	0	0	1	0	0	0	0	1	1	1	0	0	0	0	0	0	14.19	1.01	0.16	0.13	0.62	0.13	0.44	0.10	0.06	0.04	0.04	0.04	0.05	0.04	0.04	0.09	1.69	0.07	0.63	0.06	0.16	0.05	0.04	0.04
4411406	59	1	65	165	24	7	169	87	0	0	0	1	1	0	0	1	1	0	0	0	0	1	0	0	0	18.42	1.85	0.26	0.14	0.93	0.30	0.27	0.16	0.07	0.03	0.05	0.06	0.06	0.08	0.05	0.06	0.79	0.06	0.47	0.03	0.09	0.07	0.05	0.10
4409508	62	1	60	160	23	16	140	74	0	1	0	1	1	0	0	0	1	1	0	0	0	0	0	1	0	23.68	3.75	0.50	0.21	2.60	0.28	0.64	0.31	0.08	0.10	0.10	0.09	0.09	0.09	0.06	0.08	1.83	0.09	0.66	0.04	0.16	0.09	0.08	0.11
4412869	80	1	70	155	29	30	150	90	0	0	0	0	1	0	0	0	1	0	0	0	0	1	1	0	0	21.46	1.85	0.27	0.16	0.63	0.13	0.15	0.08	0.06	0.06	0.09	0.17	0.05	0.07	0.05	0.05	1.20	0.05	0.49	0.05	0.08	0.05	0.06	0.14
4416653	50	1	65	160	25	5	164	71	0	0	0	0	1	0	0	0	1	1	0	0	0	1	0	0	0	13.83	1.16	0.17	0.09	0.99	0.20	0.24	0.07	0.07	0.04	0.04	0.05	0.03	0.04	0.04	0.07	0.99	0.06	0.49	0.03	0.07	0.06	0.04	0.07
4448610	59	1	78	167	28	3	162	106	0	1	0	0	0	0	0	0	0	0	0	0	0	0	0	0	0	16.06	1.02	0.34	0.23	0.91	0.28	0.24	0.06	0.06	0.06	0.15	0.24	0.11	0.13	0.07	0.03	3.72	0.11	0.91	0.04	0.09	0.04	0.04	0.23
4388938	70	1	63	155	26	0	154	77	0	1	0	0	0	0	0	0	1	0	0	1	1	0	0	0	0	9.74	1.29	0.22	0.07	0.47	0.13	0.35	0.14	0.06	0.05	0.17	0.35	0.11	0.12	0.08	0.04	1.13	0.03	0.55	0.04	0.09	0.10	0.05	0.11
4426034	55	1	86	174	28	0	157	86	0	0	0	0	1	0	0	0	1	1	0	0	0	0	0	0	0	11.05	2.43	0.30	0.11	0.71	0.21	0.20	0.05	0.08	0.03	0.03	0.03	0.03	0.06	0.07	0.08	0.86	0.11	0.64	0.07	0.11	0.11	0.08	0.04
4420577	47	1	90	183	27	5	154	90	0	0	0	1	1	0	0	0	1	1	0	0	1	0	1	0	0	8.91	0.88	0.23	0.08	0.78	0.15	0.48	0.06	0.06	0.03	0.04	0.05	0.04	0.07	0.05	0.06	0.79	0.08	0.56	0.06	0.08	0.07	0.03	0.09
4465637	29	1	87	178	27	0	189	131	0	0	0	1	0	0	0	0	1	0	0	0	1	0	1	0	0	12.33	1.95	0.14	0.15	0.64	0.12	0.37	0.05	0.00	0.05	0.08	0.16	0.10	0.10	0.07	0.07	1.75	0.08	0.54	0.07	0.07	0.05	0.03	0.19
4403842	80	1	70	167	25	7	140	80	1	0	心功能三级	0	1	1	0	0	0	0	0	0	1	0	0	1	1	15.49	2.46	0.19	0.17	0.69	0.14	0.20	0.26	0.06	0.06	0.08	0.12	0.07	0.08	0.10	0.08	0.61	0.08	0.32	0.06	0.16	0.10	0.05	0.10
4393488	69	1	60	160	23	15	99	62	1	0	0	1	0	0	0	1	1	1	0	0	0	0	0	0	0	7.72	2.04	0.30	0.11	0.30	0.13	0.19	0.06	0.03	0.06	0.05	0.12	0.04	0.06	0.05	0.04	0.95	0.07	0.41	0.05	0.06	0.06	0.06	0.09
4393410	67	1	70	168	25	8	145	89	1	1	1	0	0	0	0	0	1	1	0	0	1	0	0	1	1	8.52	1.27	0.28	0.09	0.58	0.18	0.47	0.08	0.04	0.05	0.06	0.12	0.05	0.09	0.03	0.06	1.31	0.08	0.44	0.06	0.06	0.07	0.06	0.11
4466500	79	1	70	172	24	20	170	91	0	0	0	0	0	0	0	0	1	0	0	0	0	0	0	0	0	7.12	1.21	0.26	0.05	0.31	0.18	0.30	0.04	0.05	0.05	0.09	0.04	0.04	0.08	0.05	0.02	0.51	0.04	0.39	0.04	0.05	0.03	0.03	0.09
4447006	51	1	55	160	21	0	154	92	0	0	0	0	0	0	0	0	0	0	0	0	0	0	0	0	0	11.25	1.07	0.19	0.06	0.41	0.12	0.27	0.06	0.05	0.03	0.04	0.07	0.04	0.05	0.05	0.02	0.75	0.05	0.34	0.04	0.02	0.02	0.01	0.08
4439974	36	1	63	160	25	1	162	112	0	0	0	0	0	0	0	0	0	0	0	0	0	0	0	0	0	11.63	0.88	0.25	0.08	0.47	0.10	0.11	0.05	0.05	0.04	0.05	0.06	0.04	0.07	0.06	0.03	0.58	0.03	0.31	0.05	0.05	0.05	0.02	0.08
4390139	42	1	85	175	28	10	136	112	0	0	0	0	0	0	0	0	1	0	0	0	0	1	1	0	0	9.28	1.46	0.19	0.13	0.47	0.15	0.27	0.12	0.06	0.04	0.05	0.08	0.06	0.09	0.03	0.05	0.94	0.06	0.48	0.04	0.06	0.06	0.06	0.08
4394436	52	1	45	150	20	6	116	86	0	0	0	1	0	0	0	0	1	0	0	0	0	0	0	0	0	19.86	1.51	0.23	0.31	0.83	0.15	0.53	0.10	0.05	0.06	0.06	0.10	0.07	0.04	0.07	0.05	0.99	0.08	0.36	0.04	0.07	0.08	0.06	0.15
4458084	46	1	79	170	27	10	147	99	0	0	0	0	0	0	0	0	1	0	0	0	0	0	1	0	0	9.01	1.26	0.16	0.13	0.77	0.17	0.25	0.04	0.00	0.05	0.18	0.28	0.09	0.07	0.06	0.02	0.80	0.02	0.38	0.03	0.07	0.07	0.03	0.13
4396352	60	1	96	175	31	0	153	94	0	0	0	1	1	0	0	0	1	1	0	0	0	0	0	0	0	12.03	1.49	0.27	0.07	0.47	0.10	0.30	0.06	0.05	0.03	0.08	0.11	0.04	0.04	0.04	0.05	0.68	0.05	0.45	0.05	0.06	0.06	0.03	0.10
4448850	74	1	47	155	20	20	132	60	0	0	0	0	0	0	0	0	1	1	0	0	0	0	0	0	0	6.28	0.88	0.21	0.07	0.44	0.21	0.22	0.04	0.08	0.06	0.04	0.07	0.03	0.05	0.09	0.03	0.60	0.03	0.27	0.03	0.06	0.02	0.02	0.07
4455976	52	1	57	156	23	5	145	89	0	0	0	1	1	0	0	0	1	0	0	0	0	0	0	0	0	3.66	0.40	0.19	0.05	0.33	0.08	0.21	0.02	0.04	0.02	0.03	0.04	0.02	0.06	0.03	0.01	0.45	0.03	0.25	0.03	0.06	0.02	0.02	0.05
4411663	45	1	82	175	27	5	120	80	0	0	0	1	1	0	0	0	1	0	0	0	0	0	0	0	0	14.75	1.22	0.22	0.20	1.10	0.27	0.31	0.19	0.10	0.04	0.07	0.10	0.06	0.07	0.06	0.07	0.82	0.06	0.51	0.06	0.15	0.07	0.05	0.09
4396128	34	1	81	183	24	0	118	82	0	0	0	1	0	0	0	0	1	1	0	0	0	0	0	0	0	15.33	4.07	0.24	0.13	0.90	0.16	0.46	0.16	0.06	0.08	0.23	0.38	0.08	0.08	0.06	0.04	1.30	0.08	0.50	0.05	0.05	0.08	0.09	0.12
4167007	51	1	47	158	19	6	119	65	0	0	0	1	0	0	0	0	1	0	0	0	0	0	0	0	0	12.69	1.78	0.28	0.08	0.52	0.14	0.29	0.13	0.09	0.04	0.06	0.13	0.06	0.05	0.08	0.02	0.55	0.05	0.23	0.06	0.06	0.08	0.05	0.10
4458138	42	1	96	180	30	4	162	114	0	0	0	0	1	0	0	0	1	0	0	0	0	0	1	0	0	4.77	0.77	0.07	0.09	0.46	0.10	0.25	0.03	0.00	0.02	0.02	0.03	0.03	0.09	0.07	0.02	0.98	0.05	0.35	0.04	0.05	0.04	0.03	0.05
4417200	71	1	65	172	22	8	182	82	0	0	0	1	0	0	0	0	1	0	0	0	1	0	0	0	0	29.01	1.04	0.18	0.89	0.58	0.13	0.32	0.10	0.12	0.04	0.04	0.05	0.04	0.06	0.07	0.06	0.99	0.07	0.62	0.04	0.08	0.06	0.04	0.08
4406237	42	1	93	170	32	13	166	98	0	0	0	0	1	0	0	0	1	0	0	0	0	0	0	0	0	19.82	3.03	0.30	0.18	1.26	0.30	0.38	0.25	0.05	0.10	0.24	0.53	0.14	0.08	0.08	0.06	1.74	0.09	0.89	0.08	0.08	0.11	0.09	0.29
4396976	73	1	64	155	27	0	149	71	0	0	0	0	1	0	0	0	0	0	0	0	0	0	0	0	0	8.31	0.81	0.11	0.06	0.36	0.08	0.15	0.07	0.03	0.03	0.05	0.08	0.04	0.06	0.06	0.04	0.58	0.08	0.35	0.04	0.05	0.04	0.04	0.05
4284481	79	1	70	165	26	6	179	75	0	1	0	0	0	0	0	0	1	1	0	0	1	0	0	0	0	6.98	1.15	0.16	0.05	0.24	0.15	0.14	0.07	0.04	0.04	0.04	0.07	0.04	0.08	0.05	0.04	1.15	0.11	0.41	0.03	0.05	0.04	0.04	0.06
4195507	74	1	72	170	25	0	115	73	0	1	0	0	1	0	0	1	0	0	0	0	0	1	1	0	0	9.42	1.96	0.23	0.11	0.76	0.21	0.40	0.05	0.04	0.08	0.07	0.13	0.06	0.10	0.07	0.04	0.88	0.07	0.47	0.05	0.05	0.08	0.02	0.09
4385869	73	1	72	160	28	6	128	86	1	1	0	1	0	0	0	0	1	0	0	0	0	0	0	0	0	10.50	1.92	0.23	0.10	0.66	0.14	0.50	0.15	0.08	0.08	0.12	0.16	0.14	0.13	0.03	0.04	0.86	0.05	0.47	0.06	0.06	0.04	0.01	0.08
4387276	56	1	78	170	27	0	110	70	0	1	0	1	0	0	0	0	1	0	0	0	0	0	0	0	0	7.95	2.52	0.33	0.15	0.76	0.28	0.39	0.10	0.08	0.12	0.11	0.16	0.08	0.13	0.06	0.02	1.25	0.08	0.43	0.05	0.03	0.07	0.03	0.11
4120926	53	1	87	175	28	10	120	83	0	0	0	1	1	0	0	0	1	0	0	0	0	0	0	0	0	17.48	2.34	0.36	0.18	0.45	0.21	0.36	0.10	0.07	0.06	0.07	0.06	0.05	0.06	0.05	0.07	1.05	0.08	0.40	0.06	0.10	0.08	0.08	0.12
4406676	50	1	51	160	20	3	153	101	0	0	0	1	0	1	0	0	0	0	0	0	0	0	0	0	0	17.52	1.62	0.20	0.12	0.84	0.13	0.27	0.27	0.05	0.07	0.25	0.40	0.10	0.06	0.07	0.04	1.25	0.06	0.42	0.04	0.06	0.07	0.04	0.14
4450643	81	1	85	180	26	20	130	89	1	1	心功能Ⅳ级	0	0	0	0	0	1	1	0	0	0	0	0	1	1	11.29	0.85	0.10	0.10	0.34	0.05	0.12	0.04	0.00	0.02	0.05	0.08	0.05	0.12	0.07	0.03	1.28	0.05	0.57	0.07	0.07	0.07	0.05	0.10
4428327	64	1	67	162	26	16	125	52	1	0	0	1	1	0	0	0	1	1	0	0	0	0	0	0	0	13.49	1.19	0.19	0.09	1.12	0.18	0.32	0.06	0.07	0.04	0.04	0.04	0.03	0.03	0.03	0.02	0.95	0.04	0.53	0.07	0.05	0.04	0.02	0.08
4389364	61	1	52	162	20	0	91	63	0	0	0	0	0	0	0	0	1	0	0	0	0	0	0	0	0	7.81	2.12	0.42	0.13	0.70	0.24	0.19	0.20	0.07	0.09	0.07	0.13	0.12	0.09	0.12	0.04	0.50	0.06	0.23	0.06	0.06	0.06	0.03	0.23
4408407	19	1	100	170	35	1	127	97	0	0	0	1	1	0	0	0	1	0	0	0	0	0	0	0	0	15.69	1.11	0.13	0.26	0.64	0.06	0.31	0.08	0.05	0.03	0.06	0.07	0.05	0.04	0.04	0.05	0.88	0.03	0.32	0.04	0.08	0.06	0.04	0.06
4457865	63	1	66	171	23	5	150	80	0	0	0	1	1	0	0	0	1	1	0	0	0	0	0	0	0	8.90	1.49	0.30	0.20	0.53	0.38	0.43	0.08	0.11	0.05	0.09	0.11	0.08	0.11	0.14	0.04	1.17	0.04	0.54	0.09	0.10	0.07	0.03	0.12
4443320	62	1	85	178	27	8	194	90	0	1	0	1	1	0	0	0	1	0	0	0	0	0	1	0	0	9.62	0.87	0.29	0.07	0.46	0.14	0.18	0.05	0.10	0.07	0.11	0.12	0.07	0.05	0.06	0.02	0.62	0.03	0.26	0.03	0.06	0.03	0.02	0.13
4391394	79	1	69	155	29	3	150	76	0	0	0	0	1	0	0	1	0	1	0	0	0	0	0	0	0	14.69	0.99	0.22	0.18	0.50	0.08	0.18	0.14	0.05	0.06	0.11	0.13	0.06	0.08	0.09	0.02	0.74	0.08	0.38	0.06	0.06	0.04	0.03	0.13
4392813	74	1	74	172	25	0	130	75	0	0	0	1	0	0	0	1	1	0	0	0	0	0	0	0	0	30.59	2.45	0.44	0.45	1.09	0.32	0.66	0.30	0.12	0.12	0.34	0.75	0.14	0.13	0.24	0.08	1.64	0.08	0.64	0.08	0.09	0.08	0.04	0.53
4384277	71	1	47	155	20	0	125	63	0	0	0	1	0	0	0	0	1	0	0	0	0	0	0	0	0	5.30	0.98	0.29	0.12	0.71	0.20	0.52	0.07	0.08	0.05	0.04	0.04	0.06	0.09	0.04	0.05	0.84	0.04	0.43	0.05	0.07	0.03	0.02	0.04
4150640	72	1	52	160	20	8	128	67	0	0	0	0	1	1	0	0	1	0	0	0	0	0	0	0	0	7.70	0.87	0.19	0.05	0.63	0.10	0.31	0.08	0.04	0.05	0.08	0.12	0.11	0.09	0.03	0.04	0.86	0.02	0.32	0.04	0.07	0.02	0.03	0.06
4269949	72	1	60	158	24	0	142	90	1	1	0	1	0	0	0	0	1	1	0	0	0	0	0	0	0	16.78	2.61	0.29	0.38	0.72	0.22	0.44	0.14	0.06	0.16	0.23	0.47	0.12	0.10	0.11	0.07	0.82	0.04	0.32	0.05	0.06	0.04	0.03	0.19
4421162	67	1	70	165	26	0	166	80	0	0	0	1	0	0	0	0	1	0	0	0	0	0	1	0	0	7.99	1.39	0.15	0.06	0.41	0.12	0.16	0.08	0.07	0.02	0.03	0.03	0.03	0.04	0.03	0.05	0.63	0.07	0.33	0.03	0.11	0.05	0.03	0.08
4201909	73	1	56	160	22	12	144	63	1	0	0	1	0	0	0	1	1	1	0	0	0	0	1	0	0	14.42	0.91	0.25	0.09	0.68	0.16	0.33	0.08	0.06	0.04	0.02	0.06	0.04	0.09	0.04	0.04	0.96	0.07	0.48	0.06	0.08	0.05	0.05	0.09
4421186	51	1	54	159	21	6	130	81	0	0	0	1	1	1	0	0	1	0	0	0	0	0	0	0	0	7.77	0.54	0.05	0.09	0.83	0.06	0.15	0.06	0.04	0.04	0.08	0.11	0.06	0.04	0.03	0.04	0.42	0.05	0.22	0.04	0.07	0.05	0.02	0.11
4404955	58	1	75	172	25	5	135	82	0	0	0	0	1	1	0	0	1	0	0	0	0	0	0	0	0	10.60	2.05	0.31	0.11	0.58	0.22	0.25	0.16	0.06	0.06	0.16	0.23	0.06	0.05	0.05	0.08	0.71	0.06	0.32	0.05	0.11	0.05	0.05	0.14
4410094	66	1	60	155	25	13	168	80	1	0	0	1	1	1	0	0	1	0	0	0	1	0	1	0	0	8.89	1.45	0.22	0.21	0.52	0.16	0.17	0.16	0.05	0.06	0.06	0.06	0.04	0.05	0.03	0.03	0.52	0.03	0.26	0.02	0.14	0.04	0.04	0.05
4418910	63	1	68	165	25	0	156	97	0	0	0	1	1	0	0	0	1	1	0	0	0	0	0	0	0	8.92	1.17	0.17	0.12	0.62	0.16	0.18	0.10	0.07	0.04	0.05	0.06	0.03	0.05	0.05	0.04	0.79	0.05	0.46	0.05	0.10	0.04	0.04	0.05
4417732	50	1	57	163	21	0	147	92	1	0	0	1	0	0	0	0	1	1	0	0	0	0	0	0	0	10.09	0.72	0.15	0.06	0.96	0.14	0.26	0.07	0.06	0.03	0.03	0.04	0.03	0.04	0.03	0.03	0.60	0.02	0.34	0.04	0.03	0.03	0.02	0.04
4463532	74	1	80	172	27	18	143	80	1	1	0	1	1	1	0	0	1	1	0	0	0	1	0	1	1	9.34	0.67	0.17	0.07	0.49	0.10	0.26	0.05	0.08	0.07	0.04	0.06	0.02	0.06	0.06	0.03	0.79	0.05	0.45	0.03	0.05	0.03	0.02	0.09
4407525	50	1	86	172	29	12	157	81	0	0	0	1	0	1	0	0	1	0	0	0	0	0	0	0	0	19.53	3.33	0.27	0.09	0.80	0.24	0.31	0.10	0.06	0.05	0.06	0.08	0.05	0.10	0.04	0.08	1.56	0.06	0.77	0.05	0.11	0.06	0.04	0.08
4409422	51	1	69	162	26	7	140	71	0	0	0	1	0	0	0	0	1	0	0	0	0	0	1	0	0	10.39	1.11	0.14	0.06	0.90	0.24	0.20	0.09	0.04	0.03	0.03	0.03	0.02	0.03	0.03	0.06	0.36	0.02	0.23	0.03	0.07	0.05	0.04	0.04
4418157	52	1	98	170	34	0	155	102	0	0	0	0	0	0	0	0	1	1	0	0	0	0	0	0	0	15.22	2.03	0.15	0.25	1.11	0.10	0.56	0.11	0.10	0.03	0.07	0.09	0.04	0.05	0.06	0.06	1.02	0.05	0.53	0.05	0.10	0.07	0.04	0.11
4430766	60	1	60	150	27	3	155	90	0	0	0	1	0	0	0	0	1	1	0	0	0	0	0	0	0	13.36	1.86	0.32	0.07	0.82	0.18	0.23	0.03	0.09	0.03	0.03	0.04	0.03	0.07	0.04	0.04	1.55	0.08	0.40	0.21	0.07	0.04	0.01	0.08
4446858	47	1	86	176	28	0	149	100	0	0	0	1	0	0	0	0	1	1	0	0	0	0	0	0	0	10.77	2.06	0.28	0.09	0.69	0.24	0.47	0.05	0.10	0.02	0.06	0.10	0.06	0.06	0.06	0.05	1.39	0.06	0.58	0.04	0.07	0.04	0.03	0.08
4047793	59	1	75	168	27	26	170	84	0	0	0	0	0	0	0	0	1	0	0	0	0	0	1	0	0	10.06	1.44	0.19	0.10	0.63	0.28	0.33	0.10	0.09	0.04	0.05	0.06	0.04	0.05	0.06	0.04	0.66	0.04	0.36	0.04	0.05	0.08	0.05	0.11
4418662	33	1	110	185	32	1	120	80	0	0	0	0	1	0	0	0	1	0	0	0	0	0	0	0	0	18.57	2.55	0.32	0.33	0.95	0.60	0.31	0.09	0.12	0.04	0.05	0.09	0.05	0.09	0.04	0.05	1.48	0.06	0.77	0.10	0.08	0.09	0.07	0.06
4420527	69	1	63	156	26	18	120	63	1	0	0	0	1	1	0	0	1	1	0	0	0	1	1	0	1	9.61	1.01	0.12	0.07	0.70	0.11	0.15	0.04	0.03	0.03	0.04	0.07	0.03	0.06	0.04	0.04	0.71	0.09	0.46	0.04	0.06	0.05	0.03	0.06
4386116	56	1	60	160	23	2	135	85	0	0	0	1	1	0	0	0	1	0	0	0	0	0	0	0	0	8.82	1.14	0.20	0.06	0.36	0.14	0.09	0.03	0.04	0.06	0.05	0.12	0.17	0.14	0.02	0.06	0.89	0.05	0.46	0.06	0.04	0.04	0.01	0.05
4424348	43	1	66	162	25	6	136	86	0	0	0	0	1	0	0	0	1	1	0	0	0	0	0	0	0	9.01	1.34	0.15	0.09	0.60	0.18	0.50	0.07	0.07	0.04	0.05	0.05	0.04	0.04	0.02	0.06	1.13	0.05	0.50	0.05	0.13	0.08	0.02	0.07
4393963	53	1	67	175	22	12	107	85	0	0	0	1	1	0	0	0	1	0	0	0	0	0	0	0	0	9.03	1.36	0.18	0.09	0.68	0.11	0.34	0.06	0.04	0.05	0.04	0.07	0.06	0.12	0.03	0.04	0.95	0.13	0.43	0.08	0.06	0.05	0.06	0.06
4406389	54	1	88	175	29	11	140	90	0	1	0	0	1	0	0	0	1	1	0	0	0	1	1	0	0	21.61	1.74	0.34	0.20	0.79	0.21	0.30	0.12	0.05	0.07	0.08	0.09	0.05	0.07	0.06	0.05	0.91	0.09	0.43	0.04	0.09	0.07	0.07	0.10
4418333	41	1	68	180	21	0	130	85	0	0	0	0	0	0	0	0	1	0	0	0	0	0	0	0	0	20.75	1.27	0.30	0.51	0.83	0.16	0.35	0.05	0.09	0.05	0.06	0.07	0.13	0.08	0.08	0.14	1.86	0.11	1.12	0.10	0.32	0.16	0.13	0.11
4440810	44	1	73	160	29	0	147	86	0	0	0	1	1	1	0	0	1	0	0	0	0	0	0	0	0	8.23	1.31	0.16	0.09	0.56	0.16	0.13	0.03	0.03	0.03	0.02	0.03	0.04	0.05	0.04	0.04	0.35	0.02	0.18	0.03	0.08	0.04	0.02	0.04
4238767	59	1	82	175	27	16	119	75	0	0	0	0	1	0	0	0	1	1	0	0	0	0	0	0	0	10.94	1.26	0.12	0.11	0.65	0.08	0.26	0.12	0.06	0.04	0.06	0.12	0.05	0.05	0.04	0.06	0.76	0.06	0.45	0.05	0.07	0.06	0.04	0.11
4341881	65	1	70	160	27	10	150	70	0	0	0	1	0	0	0	0	1	1	0	0	1	0	1	0	0	11.05	1.16	0.21	0.07	0.89	0.15	0.29	0.13	0.04	0.06	0.08	0.06	0.05	0.06	0.06	0.05	1.01	0.05	0.42	0.03	0.05	0.05	0.04	0.12
4392516	65	1	66	165	24	12	120	58	1	0	0	0	0	0	0	0	1	0	0	0	0	0	0	0	0	8.17	0.53	0.17	0.07	0.65	0.06	0.11	0.13	0.06	0.03	0.04	0.05	0.03	0.04	0.04	0.04	0.49	0.05	0.30	0.05	0.05	0.05	0.02	0.09
4390294	63	1	75	160	29	7	140	80	0	0	0	1	1	1	0	0	1	0	0	0	0	0	0	0	0	11.70	1.42	0.28	0.10	1.13	0.27	0.42	0.20	0.09	0.08	0.08	0.10	0.08	0.09	0.10	0.05	1.06	0.06	0.55	0.04	0.05	0.05	0.03	0.14
4440956	65	1	80	171	27	20	158	100	0	0	0	0	1	0	0	0	1	0	0	0	0	1	1	0	0	12.29	1.59	0.19	0.08	0.53	0.12	0.22	0.05	0.10	0.02	0.00	0.04	0.03	0.05	0.04	0.02	0.53	0.02	0.27	0.06	0.08	0.05	0.03	0.04
4417650	71	1	90	176	29	4	110	63	1	0	心功能Ⅳ级	1	0	1	0	0	0	1	0	0	0	0	0	0	1	9.70	1.52	0.15	0.07	0.69	0.14	0.27	0.05	0.06	0.03	0.04	0.05	0.03	0.05	0.03	0.02	0.52	0.06	0.26	0.02	0.06	0.04	0.03	0.07
4386158	60	1	62	166	22	2	148	85	0	0	0	1	1	0	0	0	1	1	0	0	0	0	0	0	0	4.42	0.68	0.13	0.06	0.54	0.18	0.34	0.02	0.07	0.05	0.04	0.13	0.10	0.13	0.08	0.04	0.83	0.08	0.42	0.08	0.12	0.05	0.06	0.02
4415884	59	1	50	160	20	8	159	69	0	0	0	0	1	0	0	0	1	0	0	0	0	0	0	0	0	17.21	1.50	0.22	0.13	0.50	0.11	0.18	0.10	0.06	0.04	0.07	0.08	0.04	0.04	0.03	0.10	1.18	0.08	0.58	0.04	0.10	0.05	0.03	0.07
4395194	62	1	75	170	26	10	143	76	0	0	0	0	0	0	0	0	1	0	0	0	0	0	0	0	0	8.75	1.65	0.13	0.06	0.49	0.13	0.26	0.10	0.05	0.07	0.17	0.27	0.06	0.07	0.05	0.04	0.96	0.04	0.47	0.06	0.04	0.05	0.05	0.20
4386801	46	1	85	172	29	7	155	95	0	0	0	1	0	0	0	0	1	1	0	0	1	1	0	0	0	10.89	2.83	0.34	0.13	1.40	0.29	0.32	0.14	0.05	0.14	0.14	0.29	0.21	0.14	0.07	0.02	1.34	0.06	0.66	0.12	0.06	0.10	0.06	0.10
4391674	31	1	60	170	21	10	114	76	0	0	0	0	0	0	0	0	1	0	0	0	0	0	0	0	0	10.33	0.61	0.20	0.28	0.40	0.13	0.28	0.11	0.05	0.03	0.06	0.10	0.05	0.07	0.05	0.04	0.93	0.05	0.67	0.06	0.10	0.14	0.03	0.09
4404982	51	1	90	178	28	6	134	90	0	0	0	1	1	0	0	0	1	0	0	0	0	1	0	0	0	20.93	2.55	0.60	0.51	0.92	0.38	0.58	0.16	0.08	0.06	0.06	0.08	0.05	0.08	0.06	0.11	1.55	0.11	0.69	0.09	0.15	0.06	0.04	0.11
4405970	36	1	69	156	28	7	177	86	0	0	0	0	0	0	0	0	1	0	0	0	0	0	0	0	0	15.13	2.58	0.25	0.14	1.37	0.19	0.50	0.22	0.06	0.10	0.17	0.38	0.08	0.06	0.05	0.07	1.08	0.08	0.56	0.06	0.10	0.07	0.05	0.16
4425227	26	1	50	164	19	7	102	75	0	0	0	0	0	0	0	0	1	0	0	0	0	0	0	0	0	7.71	0.89	0.18	0.10	0.78	0.21	0.30	0.05	0.06	0.02	0.03	0.04	0.05	0.04	0.04	0.05	0.61	0.06	0.38	0.03	0.10	0.05	0.04	0.06
4406544	73	1	67	174	22	0	136	81	0	0	0	0	0	0	0	0	1	0	0	0	0	0	0	0	0	15.04	1.67	0.30	0.14	0.78	0.18	0.34	0.22	0.05	0.08	0.29	0.57	0.14	0.06	0.06	0.05	1.04	0.06	0.50	0.07	0.08	0.06	0.05	0.32
4444831	38	1	55	165	20		130	80	0	1	0	1	0	0	0	0	1	1	0	0	1	0	0	0	0	14.54	1.40	0.28	0.10	1.07	0.56	0.29	0.07	0.07	0.06	0.12	0.12	0.05	0.05	0.06	0.04	0.70	0.06	0.47	0.06	0.07	0.09	0.04	0.10
4405124	65	1	86	175	28	19	162	76	1	1	0	1	1	1	0	0	1	1	0	0	0	0	1	0	1	14.32	2.25	0.27	0.14	0.75	0.23	0.39	0.13	0.04	0.07	0.07	0.10	0.06	0.07	0.07	0.08	1.04	0.05	0.62	0.06	0.13	0.07	0.04	0.10
4431842	72	1	58	165	21	4	76	50	0	0	0	1	0	0	0	0	1	1	0	0	0	0	0	0	0	19.03	1.32	0.19	0.09	0.97	0.17	0.26	0.13	0.07	0.05	0.07	0.11	0.07	0.12	0.07	0.05	1.77	0.10	0.67	0.04	0.08	0.03	0.02	0.13
4387605	65	1	81	175	26	7	188	92	0	1	0	1	0	0	0	0	1	1	0	0	0	0	1	1	0	7.60	1.40	0.12	0.12	0.81	0.12	0.20	0.10	0.08	0.09	0.24	0.53	0.20	0.17	0.04	0.04	1.09	0.11	0.59	0.04	0.07	0.05	0.06	0.34
4413782	70	1	92	180	28	3	135	76	0	0	0	0	0	0	0	0	1	0	0	0	0	0	0	0	0	14.90	2.56	0.20	0.11	0.66	0.13	0.34	0.14	0.07	0.05	0.09	0.14	0.06	0.07	0.06	0.09	0.93	0.09	0.53	0.05	0.12	0.06	0.07	0.13
4411911	67	1	88	181	27	26	130	80	0	0	0	1	1	0	0	0	1	0	0	0	0	0	1	0	0	13.71	2.17	0.13	0.11	0.23	0.08	0.14	0.04	0.10	0.04	0.04	0.04	0.05	0.06	0.05	0.02	1.07	0.05	0.55	0.02	0.04	0.03	0.01	0.12
4449670	60	1	72	169	25	0	116	97	1	0	0	1	1	1	0	0	1	1	0	0	0	0	1	0	1	10.17	1.26	0.24	0.11	0.77	0.19	0.34	0.06	0.11	0.04	0.04	0.10	0.08	0.06	0.13	0.05	0.79	0.04	0.45	0.03	0.10	0.08	0.03	0.06
4415059	50	1	76	166	28	8	128	76	0	0	0	0	1	0	0	0	1	0	0	0	0	0	0	0	0	10.90	1.06	0.13	0.09	1.22	0.13	0.16	0.04	0.06	0.03	0.02	0.06	0.02	0.03	0.05	0.06	0.89	0.06	0.48	0.04	0.06	0.04	0.02	0.04
4161839	82	1	60	165	22	5	170	70	0	1	0	1	0	0	0	0	1	0	0	0	0	1	0	0	1	7.70	0.67	0.25	0.04	0.32	0.19	0.09	0.09	0.07	0.04	0.10	0.11	0.03	0.06	0.05	0.05	0.74	0.06	0.44	0.04	0.15	0.05	0.04	0.09
4397721	51	1	65	158	26	0	145	90	0	0	0	1	1	0	0	0	1	0	0	0	0	1	1	0	0	5.04	0.48	0.09	0.07	0.40	0.08	0.10	0.07	0.03	0.03	0.04	0.08	0.04	0.03	0.15	0.04	0.89	0.06	0.30	0.03	0.06	0.06	0.04	0.06
4441830	45	1	46	155	19	16	141	82	0	0	0	0	1	1	0	0	1	0	0	0	0	0	0	0	0	8.66	0.50	0.08	0.05	0.66	0.09	0.16	0.03	0.07	0.03	0.04	0.05	0.03	0.05	0.04	0.04	0.65	0.04	0.35	0.04	0.06	0.04	0.03	0.04
4343007	68	1	70	170	24	20	176	78	0	0	0	1	1	0	0	0	1	1	0	0	0	0	0	0	0	10.56	0.84	0.20	0.14	0.75	0.13	0.35	0.05	0.07	0.05	0.14	0.18	0.07	0.08	0.02	0.05	0.82	0.05	0.44	0.04	0.05	0.06	0.03	0.08
4388360	34	1	75	160	29	2	141	98	0	0	0	0	0	0	0	0	1	0	0	0	0	0	0	0	0	6.74	1.28	0.17	0.10	0.79	0.13	0.32	0.04	0.07	0.07	0.11	0.14	0.19	0.09	0.05	0.02	0.96	0.07	0.37	0.03	0.06	0.05	0.03	0.08
4390413	64	1	80	179	25	17	130	68	0	1	0	1	0	0	0	0	1	1	0	0	0	0	1	0	0	15.74	1.18	0.25	0.09	0.84	0.17	0.51	0.06	0.06	0.06	0.04	0.07	0.05	0.14	0.07	0.04	1.72	0.06	0.68	0.07	0.12	0.06	0.04	0.08
4386031	52	1	78	175	25	0	148	87	0	0	0	1	1	0	0	0	1	1	0	0	0	0	0	0	0	13.89	3.51	0.62	0.24	0.72	0.39	0.54	0.10	0.09	0.16	0.25	0.37	0.18	0.15	0.04	0.05	1.80	0.10	0.80	0.06	0.09	0.04	0.05	0.18
4446020	53	1	61	167	22	20	107	69	1	0	0	0	1	1	0	0	1	0	0	0	0	0	0	0	0	9.93	1.24	0.16	0.16	0.67	0.10	0.42	0.00	0.05	0.03	0.03	0.04	0.04	0.07	0.08	0.01	0.51	0.05	0.38	0.03	0.05	0.04	0.02	0.04
4413052	57	1	80	158	32	0	174	94	0	1	0	1	0	0	0	0	0	0	0	0	0	0	1	0	0	15.31	1.67	0.23	0.10	1.36	0.23	0.45	0.18	0.06	0.05	0.05	0.05	0.04	0.04	0.05	0.09	0.91	0.05	0.34	0.04	0.14	0.06	0.04	0.06
4429758	58	1	80	175	26	1	150	100	0	1	0	0	0	0	0	0	0	1	0	0	0	1	1	0	0	19.18	4.04	0.37	0.13	0.92	0.26	0.36	0.09	0.06	0.09	0.18	0.26	0.07	0.06	0.05	0.04	1.29	0.07	0.79	0.10	0.11	0.05	0.04	0.19
4231265	73	1	50	158	20	27	112	74	0	0	0	0	1	1	0	0	1	1	0	0	0	0	0	0	0	11.20	1.24	0.25	0.12	1.10	0.14	0.45	0.23	0.06	0.05	0.13	0.16	0.05	0.06	0.07	0.08	1.01	0.06	0.44	0.04	0.06	0.07	0.06	0.09
4456292	64	1	86	162	33	0	132	72	0	0	0	1	1	0	0	0	1	0	0	0	0	1	1	0	1	5.15	0.60	0.08	0.07	0.33	0.11	0.17	0.06	0.06	0.02	0.05	0.10	0.06	0.05	0.06	0.02	0.49	0.03	0.24	0.02	0.04	0.03	0.02	0.00
4456516	54	1	58	170	20	4	126	73	0	0	0	0	0	0	0	0	1	1	0	0	0	0	0	0	0	5.37	0.74	0.09	0.07	0.33	0.06	0.29	0.02	0.07	0.02	0.02	0.04	0.02	0.07	0.04	0.02	0.81	0.04	0.34	0.03	0.03	0.03	0.02	0.06
4410262	36	1	71	168	25	1	153	82	0	0	0	1	1	0	0	0	1	0	0	0	0	0	0	0	0	13.83	2.50	0.42	0.16	0.59	0.31	0.31	0.19	0.06	0.04	0.07	0.08	0.05	0.05	0.04	0.06	1.07	0.08	0.57	0.06	0.19	0.10	0.07	0.08
4452773	67	1	52	157	21	3	129	101	1	0	0	0	1	1	0	0	1	1	0	0	0	0	0	0	0	8.23	0.52	0.11	0.10	0.44	0.09	0.10	0.05	0.05	0.02	0.02	0.05	0.04	0.05	0.05	0.02	0.67	0.04	0.39	0.03	0.06	0.03	0.02	0.08
4414858	47	1	80	176	26	8	130	80	0	0	0	1	1	0	0	0	1	1	1	0	0	0	0	0	0	22.93	3.10	0.42	0.19	1.28	0.49	0.33	0.16	0.11	0.08	0.17	0.29	0.08	0.10	0.06	0.06	1.03	0.07	0.45	0.05	0.08	0.06	0.05	0.12
4415916	27	1	80	165	29	0	129	79	0	0	0	1	1	0	0	0	1	0	0	0	0	0	0	0	0	12.83	2.68	0.15	0.18	0.58	0.13	0.25	0.06	0.06	0.04	0.05	0.06	0.03	0.04	0.04	0.09	1.02	0.07	0.55	0.05	0.12	0.06	0.06	0.06
4430323	20	1	51	150	23	0	111	78	0	0	0	0	0	0	0	0	1	0	0	0	0	0	0	0	0	12.55	1.35	0.09	0.12	0.63	0.09	0.19	0.04	0.04	0.03	0.04	0.09	0.03	0.03	0.03	0.06	1.46	0.06	0.57	0.19	0.07	0.03	0.02	0.05
4391095	44	1	55	156	23	9	147	86	0	0	0	1	1	1	0	0	1	0	0	0	0	0	0	0	0	9.01	0.82	0.17	0.09	1.05	0.09	0.24	0.10	0.04	0.04	0.06	0.08	0.06	0.07	0.05	0.03	0.79	0.05	0.35	0.04	0.08	0.05	0.02	0.06
4421272	60	1	64	155	27	0	140	94	0	0	0	1	0	0	0	0	1	1	0	0	0	0	0	0	0	13.84	1.59	0.15	0.16	0.75	0.17	0.25	0.09	0.08	0.05	0.09	0.09	0.06	0.07	0.06	0.06	1.16	0.07	0.47	0.05	0.08	0.07	0.03	0.13
4451304	50	1	63	160	25	13	138	69	0	0	0	0	1	1	0	0	1	1	0	0	0	0	0	0	0	10.05	1.46	0.17	0.10	1.08	0.17	0.32	0.05	0.05	0.05	0.05	0.08	0.04	0.07	0.07	0.02	0.86	0.05	0.53	0.04	0.05	0.03	0.02	0.05
4031913	71	1	83	170	29	28	128	70	1	0	0	1	1	1	0	0	1	1	0	0	0	0	0	0	1	12.85	1.05	0.20	0.13	0.54	0.09	0.18	0.13	0.04	0.03	0.07	0.10	0.05	0.05	0.07	0.05	1.07	0.05	0.57	0.05	0.08	0.07	0.08	0.14
4431992	21	1	102	176	33	0	147	98	0	0	0	0	1	0	0	0	1	0	0	0	0	0	0	0	0	13.89	2.66	0.33	0.17	1.16	0.20	0.40	0.07	0.08	0.06	0.12	0.15	0.05	0.06	0.03	0.02	1.63	0.06	0.43	0.02	0.07	0.04	0.03	0.08
4385783	50	1	75	180	23	9	109	79	0	0	0	1	0	0	0	0	1	0	0	0	0	0	0	0	0	9.90	1.45	0.37	0.18	0.50	0.27	0.32	0.13	0.05	0.12	0.18	0.37	0.10	0.14	0.04	0.07	0.98	0.07	0.63	0.15	0.08	0.12	0.03	0.09
4431312	64	1	77	170	27	10	117	87	1	0	0	1	0	0	0	0	0	1	0	0	0	0	0	0	0	15.76	1.40	0.22	0.13	0.69	0.12	0.21	0.05	0.11	0.03	0.03	0.04	0.02	0.06	0.04	0.04	0.89	0.06	0.63	0.07	0.08	0.05	0.03	0.05
4431541	54	1	63	175	21	0	106	68	0	0	0	0	0	0	0	0	1	1	0	0	0	0	0	0	0	12.87	1.25	0.23	0.19	0.54	0.15	0.30	0.06	0.07	0.05	0.06	0.04	0.03	0.06	0.03	0.05	1.36	0.05	0.81	0.09	0.08	0.04	0.03	0.06
4425275	42	1	85	178	27	12	114	66	1	0	0	1	0	0	0	0	1	0	0	0	0	0	0	0	0	9.28	1.74	0.18	0.06	0.39	0.16	0.18	0.05	0.04	0.03	0.04	0.05	0.03	0.04	0.03	0.05	0.86	0.06	0.38	0.03	0.09	0.04	0.03	0.06
4392605	70	1	36	165	13	9	101	70	0	0	0	0	0	0	0	0	1	0	0	0	0	0	0	0	1	12.69	0.63	0.13	0.15	0.78	0.13	0.36	0.12	0.08	0.07	0.10	0.17	0.07	0.09	0.09	0.05	0.82	0.12	0.36	0.04	0.12	0.06	0.03	0.19
4415129	66	1	72	167	26	7	140	79	0	0	0	0	1	0	0	0	1	1	0	0	0	0	0	0	0	6.16	0.78	0.12	0.06	0.45	0.10	0.22	0.00	0.04	0.04	0.04	0.03	0.03	0.03	0.06	0.02	0.49	0.02	0.25	0.02	0.04	0.03	0.02	0.04
4413006	68	1	70	155	29	0	182	92	0	0	0	1	0	0	0	0	1	1	0	0	0	0	0	0	0	11.30	1.18	0.17	0.07	1.13	0.10	0.14	0.05	0.07	0.03	0.04	0.05	0.04	0.05	0.04	0.06	0.74	0.05	0.38	0.04	0.08	0.04	0.05	0.07
4424606	54	1	80	178	25	7	132	92	0	0	0	1	1	0	0	0	1	0	0	0	0	0	0	0	0	8.81	1.88	0.32	0.12	1.13	0.23	0.40	0.07	0.08	0.03	0.03	0.04	0.03	0.05	0.03	0.05	1.37	0.07	0.58	0.05	0.09	0.06	0.05	0.07
4412886	64	1	70	170	24	0	118	56	0	0	0	1	0	0	0	0	1	1	0	0	0	0	0	0	0	10.46	1.24	0.15	0.11	0.69	0.14	0.32	0.04	0.05	0.03	0.06	0.07	0.03	0.05	0.04	0.06	1.42	0.06	0.51	0.09	0.11	0.06	0.04	0.09
4438432	76	1	57	160	22	7	163	75	0	1	0	0	1	1	0	0	1	1	0	0	0	1	1	0	0	7.01	0.42	0.12	0.06	0.34	0.11	0.12	0.05	0.05	0.04	0.04	0.09	0.04	0.07	0.05	0.03	0.70	0.05	0.44	0.03	0.05	0.05	0.03	0.06
4454617	63	1	58	155	24	0	138	76	0	0	0	1	0	0	0	0	1	1	0	0	0	0	0	0	0	6.61	0.77	0.10	0.05	0.55	0.05	0.20	0.02	0.03	0.01	0.02	0.05	0.03	0.08	0.05	0.04	0.81	0.03	0.25	0.02	0.04	0.02	0.01	0.04
4396287	60	1	58	155	24	0	166	88	0	0	0	0	1	0	0	1	1	0	0	0	0	0	1	0	0	12.11	1.08	0.13	0.10	0.28	0.22	0.28	0.09	0.06	0.03	0.05	0.10	0.05	0.05	0.03	0.04	1.38	0.05	0.46	0.04	0.07	0.06	0.05	0.08
4417818	75	1	83	170	29	0	100	71	0	1	0	1	0	0	0	0	0	0	0	0	1	0	0	0	0	7.74	1.05	0.10	0.05	0.56	0.07	0.18	0.04	0.04	0.02	0.02	0.03	0.02	0.04	0.02	0.01	0.56	0.03	0.25	0.02	0.04	0.03	0.02	0.03
4406413	63	1	75	168	27	0	154	74	0	0	0	0	0	0	0	0	1	0	0	0	1	0	0	0	0	17.21	2.11	0.24	0.12	0.88	0.17	0.32	0.11	0.05	0.04	0.07	0.09	0.05	0.07	0.08	0.08	1.39	0.08	0.53	0.05	0.11	0.08	0.05	0.11
4356570	52	1	70	163	26	23	122	66	0	0	0	1	1	0	0	0	1	0	0	0	0	0	1	0	0	10.37	1.77	0.15	0.12	0.23	0.07	0.20	0.05	0.04	0.04	0.05	0.09	0.03	0.05	0.05	0.05	0.96	0.09	0.43	0.04	0.06	0.06	0.04	0.08
4381983	42	1	84	180	26	1	120	90	0	0	0	1	1	0	0	0	1	1	0	0	0	0	0	0	0	11.82	3.31	0.27	0.09	0.76	0.24	0.41	0.04	0.08	0.09	0.14	0.22	0.12	0.09	0.05	0.02	1.18	0.08	0.54	0.02	0.05	0.06	0.03	0.12
4440757	45	1	71	169	25	9	121	97	0	0	0	1	0	0	0	0	1	1	0	0	0	0	0	0	0	9.41	0.78	0.14	0.07	0.85	0.11	0.25	0.03	0.07	0.02	0.02	0.03	0.04	0.09	0.04	0.02	0.65	0.04	0.45	0.05	0.08	0.03	0.02	0.04
4447928	61	1	52	154	22	2	144	78	0	0	0	0	0	0	0	0	1	0	0	0	0	0	0	0	0	13.76	2.35	0.29	0.08	0.59	0.16	0.43	0.07	0.07	0.05	0.04	0.05	0.05	0.07	0.05	0.02	1.42	0.12	0.85	0.03	0.02	0.03	0.02	0.08
4403927	30	1	76	168	27	0	115	83	0	0	0	0	0	0	0	0	1	0	0	0	0	0	0	0	0	11.24	0.62	0.29	0.34	0.38	0.14	0.23	0.10	0.05	0.03	0.05	0.09	0.04	0.05	0.06	0.06	1.09	0.05	0.50	0.04	0.12	0.06	0.03	0.10
4458289	46	1	61	164	23	8	102	70	0	0	0	0	1	0	0	1	1	0	0	0	0	0	0	0	0	3.58	0.67	0.10	0.06	0.34	0.11	0.40	0.03	0.07	0.02	0.02	0.03	0.03	0.03	0.03	0.02	0.69	0.03	0.34	0.04	0.06	0.04	0.02	0.03
4412229	28	1	89	174	29	2	130	90	0	0	0	0	0	0	0	0	1	0	0	0	0	0	0	0	0	26.13	1.16	0.25	0.14	0.27	0.16	0.20	0.12	0.06	0.06	0.07	0.12	0.13	0.24	0.09	0.06	3.44	0.09	0.90	0.05	0.08	0.07	0.03	0.28
4456529	82	1	75	165	28	4	175	81	1	1	0	0	0	0	0	0	0	1	0	0	0	0	0	0	0	9.62	1.09	0.23	0.10	0.43	0.14	0.32	0.03	0.00	0.02	0.03	0.06	0.07	0.06	0.06	0.05	1.25	0.06	0.53	0.06	0.04	0.04	0.02	0.09
4446482	65	1	69	165	25	3	149	81	0	0	0	0	1	0	0	0	1	0	0	0	0	0	0	0	1	7.60	1.31	0.22	0.12	0.72	0.17	0.40	0.11	0.06	0.06	0.15	0.20	0.09	0.07	0.10	0.03	0.89	0.04	0.38	0.03	0.07	0.04	0.02	0.19
4454291	68	1	65	158	26	17	121	74	1	1	0	0	1	0	0	0	1	0	0	0	0	1	0	0	0	3.28	0.49	0.03	0.03	0.21	0.03	0.09	0.02	0.00	0.02	0.02	0.02	0.02	0.05	0.02	0.03	0.29	0.02	0.12	0.02	0.03	0.02	0.01	0.00
4404057	66	1	63	160	25	3	158	100	0	1	0	0	1	0	0	0	1	0	0	0	0	0	0	0	0	9.17	0.85	0.11	0.06	0.90	0.06	0.26	0.12	0.06	0.05	0.08	0.14	0.04	0.05	0.06	0.07	0.65	0.05	0.26	0.06	0.10	0.10	0.06	0.10
4408855	59	1	71	172	24	0	145	62	0	0	0	1	0	0	0	0	1	0	0	0	0	0	0	0	0	12.86	2.86	0.28	0.18	0.67	0.25	0.51	0.12	0.08	0.08	0.07	0.05	0.03	0.05	0.04	0.09	1.20	0.07	0.63	0.05	0.11	0.05	0.05	0.06
4463223	42	1	70	170	24	0	130	90	0	0	0	0	1	0	0	0	1	0	0	0	0	0	0	0	0	10.17	2.94	0.35	0.09	0.28	0.16	0.26	0.03	0.11	0.03	0.03	0.06	0.03	0.06	0.05	0.02	1.51	0.07	0.67	0.05	0.06	0.06	0.04	0.13
4454608	55	1	55	150	24	0	159	90	0	1	0	1	1	0	0	0	1	1	0	0	0	1	0	0	0	6.48	0.81	0.13	0.07	0.86	0.08	0.25	0.00	0.00	0.02	0.03	0.07	0.07	0.04	0.04	0.04	1.47	0.05	0.47	0.04	0.04	0.03	0.03	0.07
4221790	75	1	70	155	29	10	98	74	1	0	0	0	0	0	0	0	1	0	0	0	0	0	0	0	0	10.48	0.74	0.15	0.05	0.47	0.09	0.14	0.07	0.03	0.04	0.04	0.07	0.05	0.07	0.04	0.03	0.95	0.03	0.32	0.04	0.07	0.03	0.02	0.11
4410935	29	1	100	172	34	0	120	80	0	0	0	0	0	0	0	0	0	0	0	0	0	0	0	0	0	14.49	2.45	0.19	0.14	0.83	0.19	0.28	0.11	0.06	0.05	0.08	0.11	0.06	0.08	0.06	0.06	1.03	0.08	0.52	0.03	0.10	0.05	0.05	0.08
4397132	55	1	83	182	25	11	118	78	0	0	0	0	0	0	0	0	1	0	0	0	0	0	0	0	0	5.68	1.34	0.11	0.08	0.69	0.09	0.28	0.10	0.04	0.06	0.07	0.07	0.04	0.05	0.03	0.05	0.56	0.05	0.28	0.06	0.06	0.06	0.05	0.08
4352413	45	1	70	160	27	6	131	76	0	0	0	1	1	0	0	0	1	0	0	0	0	0	0	0	0	18.04	2.17	0.37	0.12	1.08	0.28	0.47	0.16	0.07	0.07	0.09	0.13	0.05	0.05	0.08	0.07	0.83	0.06	0.45	0.04	0.07	0.06	0.04	0.15
4452027	69	1	80	172	27	7	124	81	0	0	0	0	1	0	0	0	1	1	0	0	0	0	0	0	0	6.44	1.33	0.17	0.05	0.88	0.14	0.19	0.06	0.06	0.04	0.04	0.10	0.03	0.06	0.06	0.03	0.64	0.06	0.31	0.04	0.06	0.04	0.02	0.05
4404821	68	1	76	172	26	0	154	90	0	1	0	1	1	0	1	0	1	1	0	0	0	1	1	0	0	11.30	1.74	0.31	0.12	1.11	0.17	0.47	0.12	0.09	0.08	0.13	0.26	0.06	0.06	0.05	0.07	0.77	0.07	0.35	0.06	0.08	0.07	0.05	0.10
4415293	35	1	50	158	20	2	143	110	0	0	0	1	0	0	0	0	1	0	0	0	0	0	0	0	0	10.71	0.34	0.18	0.69	0.22	0.08	0.17	0.06	0.04	0.03	0.02	0.03	0.03	0.04	0.04	0.03	0.80	0.06	0.89	0.04	0.05	0.05	0.02	0.05
4397639	36	1	57	170	20	3	107	74	0	0	0	0	1	1	0	0	1	1	0	0	0	0	0	0	0	9.49	0.56	0.15	0.19	0.30	0.09	0.28	0.08	0.04	0.04	0.08	0.08	0.03	0.04	0.05	0.04	0.43	0.04	0.32	0.05	0.08	0.13	0.04	0.06
4405003	75	1	50	160	20	10	140	60	0	0	0	0	1	1	0	0	1	0	0	0	0	0	0	0	0	22.61	2.67	0.22	0.11	0.62	0.20	0.22	0.07	0.06	0.05	0.05	0.04	0.04	0.08	0.07	0.07	1.71	0.11	0.73	0.09	0.12	0.09	0.06	0.08
4446216	52	1	70	163	26	4	120	80	0	1	0	0	1	0	0	0	0	1	0	0	0	1	0	0	0	16.18	1.58	0.29	0.13	0.79	0.17	0.47	0.07	0.07	0.06	0.12	0.18	0.07	0.08	0.08	0.02	0.88	0.06	0.36	0.05	0.08	0.07	0.03	0.08
4386941	65	1	61	150	27	3	107	74	0	1	0	1	0	0	0	0	1	1	0	0	0	0	0	0	0	5.46	0.61	0.12	0.08	0.72	0.08	0.35	0.06	0.08	0.04	0.05	0.11	0.10	0.10	0.02	0.04	1.01	0.05	0.80	0.05	0.07	0.08	0.03	0.10
4416520	46	1	70	173	23	0	118	86	0	0	0	1	0	0	0	0	1	0	0	0	0	0	1	0	0	27.95	1.80	0.29	0.60	0.77	0.15	0.31	0.06	0.07	0.04	0.06	0.07	0.04	0.05	0.04	0.04	1.63	0.09	0.65	0.05	0.06	0.07	0.05	0.08
4454570	46	1	83	172	28	0	161	113	0	0	0	1	1	1	0	0	1	1	0	0	0	0	0	0	0	7.37	1.29	0.13	0.09	0.40	0.12	0.37	0.03	0.05	0.02	0.02	0.03	0.03	0.05	0.06	0.04	0.82	0.05	0.37	0.04	0.06	0.05	0.02	0.07
4444068	25	1	92	180	28	0	144	89	0	0	0	0	0	0	0	0	1	0	0	0	0	0	0	0	0	12.12	2.50	0.27	0.34	0.81	0.18	0.30	0.04	0.00	0.00	0.05	0.07	0.00	0.08	0.04	0.04	1.00	0.03	0.21	0.02	0.05	0.05	0.03	0.06
4447249	51	1	76	177	24	2	123	74	1	0	0	1	0	0	0	0	0	1	0	0	0	0	0	0	0	15.95	4.08	0.46	0.13	0.71	0.17	0.38	0.05	0.08	0.06	0.04	0.06	0.06	0.11	0.06	0.04	1.10	0.07	0.53	0.07	0.09	0.07	0.03	0.10
4387612	56	1	58	165	21	0	117	75	0	0	0	0	1	0	0	0	1	1	0	0	0	0	0	0	0	6.02	1.06	0.19	0.11	0.62	0.16	0.28	0.05	0.05	0.06	0.05	0.03	0.08	0.11	0.04	0.02	1.25	0.05	0.49	0.05	0.04	0.08	0.07	0.07
4176827	40	1	67	174	22	0	129	79	0	0	0	1	1	0	0	0	1	0	0	0	0	0	0	0	0	5.87	1.64	0.28	0.21	0.39	0.22	0.30	0.08	0.05	0.06	0.06	0.11	0.12	0.17	0.04	0.03	1.42	0.08	0.62	0.08	0.09	0.08	0.09	0.08
4396510	62	1	55	162	21	11	150	87	0	0	0	1	1	1	1	0	1	0	0	0	0	1	1	0	0	10.12	0.87	0.12	0.06	1.01	0.16	0.24	0.06	0.04	0.03	0.03	0.05	0.03	0.08	0.06	0.05	0.61	0.05	0.29	0.03	0.07	0.05	0.05	0.05
4415035	62	1	70	173	23	10	100	60	0	0	0	0	1	0	0	0	1	0	0	0	0	0	0	0	0	17.26	2.10	0.20	0.12	1.17	0.12	0.38	0.10	0.07	0.03	0.05	0.06	0.05	0.06	0.06	0.06	1.11	0.11	0.90	0.05	0.12	0.08	0.04	0.07
4279727	34	1	60	162	23	2	133	89	0	0	0	0	0	0	0	0	1	0	0	0	0	1	0	0	0	11.38	1.54	0.17	0.13	0.38	0.08	0.25	0.09	0.04	0.05	0.19	0.30	0.05	0.06	0.04	0.06	1.01	0.08	0.61	0.06	0.12	0.06	0.05	0.10
4451168	69	1	59	156	24	7	130	90	0	0	0	0	1	0	0	0	1	0	0	0	0	1	0	0	0	7.57	0.97	0.13	0.08	0.83	0.13	0.41	0.08	0.11	0.02	0.05	0.09	0.07	0.08	0.10	0.04	0.72	0.05	0.35	0.03	0.08	0.05	0.03	0.12
4446056	45	1	67	170	23	15	123	78	0	0	0	0	0	0	0	0	1	0	0	0	0	0	0	0	0	14.05	1.61	0.16	0.12	0.87	0.11	0.54	0.00	0.00	0.03	0.06	0.15	0.05	0.11	0.13	0.02	1.26	0.05	0.52	0.06	0.09	0.03	0.02	0.11
4395030	34	1	59	165	22	0	135	92	0	0	0	0	0	0	0	0	1	0	0	0	0	0	0	0	0	13.72	2.11	0.31	0.12	1.85	0.29	0.40	0.15	0.06	0.07	0.11	0.16	0.06	0.08	0.06	0.07	1.20	0.08	0.47	0.05	0.07	0.09	0.10	0.13
4385227	52	1	72	170	25	10	120	71	0	0	0	0	0	0	0	0	1	0	1	1	0	0	0	0	0	12.79	1.56	0.16	0.09	0.45	0.30	0.40	0.08	0.05	0.06	0.09	0.24	0.16	0.19	0.06	0.07	1.38	0.07	0.47	0.05	0.16	0.10	0.06	0.13
4394766	49	1	63	176	20	6	144	87	0	0	0	1	0	0	0	0	1	1	0	0	0	0	0	0	0	10.81	1.79	0.39	0.12	0.83	0.33	0.31	0.06	0.06	0.05	0.06	0.09	0.05	0.07	0.05	0.05	0.72	0.07	0.32	0.03	0.08	0.05	0.06	0.10
4406272	60	1	60	160	23	0	94	66	1	0	0	0	0	0	0	0	0	1	0	0	0	0	0	0	0	16.00	1.70	0.22	0.14	0.55	0.13	0.16	0.12	0.05	0.09	0.13	0.23	0.06	0.06	0.06	0.06	1.03	0.06	0.52	0.05	0.06	0.08	0.05	0.11
4454996	88	1	60	150	27	0	90	60	1	1	心功能Ⅳ级	1	0	0	0	0	1	1	0	0	0	0	0	1	0	11.92	1.43	0.29	0.09	0.93	0.18	0.20	0.04	0.02	0.07	0.05	0.09	0.06	0.11	0.06	0.03	1.50	0.06	0.73	0.04	0.06	0.02	0.02	0.08
4396057	59	1	73	166	26	6	119	75	0	0	0	1	1	1	0	0	1	1	0	0	0	1	1	0	0	13.43	0.96	0.27	0.09	1.02	0.17	0.28	0.08	0.05	0.05	0.06	0.08	0.03	0.06	0.04	0.07	0.78	0.05	0.28	0.04	0.05	0.06	0.04	0.05
4427313	58	1	51	168	18	8	122	74	1	0	0	0	1	1	0	0	0	1	0	0	0	0	0	0	0	8.36	0.45	0.08	0.05	0.72	0.05	0.11	0.04	0.06	0.02	0.06	0.09	0.04	0.04	0.03	0.03	0.61	0.06	0.38	0.04	0.06	0.03	0.03	0.09
4454504	52	1	84	175	27	1	155	84	0	0	0	1	0	0	0	0	1	1	0	0	0	0	0	0	0	10.71	1.74	0.38	0.12	0.76	0.20	0.44	0.04	0.06	0.03	0.05	0.06	0.05	0.13	0.06	0.04	1.49	0.07	0.61	0.06	0.06	0.02	0.02	0.08
4391354	52	1	54	164	20	20	102	65	0	0	0	0	0	0	0	0	1	0	0	0	0	0	0	0	0	14.34	0.69	0.55	0.06	0.33	0.09	0.09	0.10	0.03	0.04	0.05	0.07	0.04	0.08	0.02	0.03	1.03	0.04	0.37	0.02	0.06	0.03	0.02	0.09
4429046	46	1	70	170	24	0	121	78	0	0	0	1	1	1	0	0	0	1	1	0	0	0	0	0	0	8.80	1.06	0.19	0.05	0.60	0.14	0.26	0.07	0.07	0.04	0.07	0.09	0.03	0.02	0.04	0.03	0.65	0.04	0.25	0.03	0.04	0.02	0.02	0.06
4429687	33	1	77	170	27	0	107	71	0	0	0	1	1	0	0	0	1	1	0	0	0	1	0	0	0	5.46	1.37	0.25	0.06	0.46	0.19	0.23	0.08	0.07	0.04	0.08	0.10	0.05	0.04	0.07	0.04	1.28	0.07	0.37	0.06	0.07	0.03	0.02	0.09
4391895	32	1	51	175	17	2	118	70	0	0	0	1	0	0	0	0	1	1	0	0	0	0	0	0	0	12.44	1.86	0.37	0.38	0.52	0.21	0.27	0.13	0.05	0.03	0.03	0.04	0.04	0.13	0.07	0.06	1.15	0.05	0.54	0.06	0.10	0.08	0.05	0.09
4436192	57	1	69	169	24	4	152	75	0	0	0	1	0	0	0	0	1	0	0	0	0	0	0	0	0	16.60	2.79	0.28	0.15	0.47	0.32	0.50	0.05	0.10	0.02	0.03	0.06	0.04	0.07	0.04	0.03	0.86	0.05	0.37	0.05	0.10	0.05	0.04	0.05
4165083	49	1	79	182	24	10	110	66	0	0	0	0	0	0	0	0	1	1	0	0	0	1	0	0	0	9.82	1.63	0.19	0.09	0.81	0.10	0.47	0.06	0.09	0.10	0.09	0.15	0.22	0.17	0.04	0.02	1.58	0.08	0.68	0.04	0.09	0.08	0.04	0.10
4445867	26	1	100	185	29	0	130	90	0	0	0	0	0	0	0	0	1	0	0	0	0	0	0	0	0	12.70	2.69	0.40	0.19	0.67	0.24	0.37	0.09	0.08	0.05	0.06	0.11	0.06	0.11	0.05	0.05	1.00	0.07	0.29	0.05	0.08	0.06	0.03	0.10
4419011	51	1	72	162	27	0	135	65	0	0	0	0	1	1	0	0	1	0	0	0	0	0	0	0	0	18.92	2.30	0.21	0.21	1.00	0.20	0.58	0.07	0.11	0.06	0.10	0.15	0.06	0.10	0.03	0.07	1.92	0.06	0.57	0.04	0.07	0.07	0.05	0.16
4388207	75	1	90	175	29	5	161	77	0	1	0	0	0	0	0	0	0	0	0	0	0	0	1	0	1	6.69	1.06	0.11	0.09	0.54	0.09	0.52	0.06	0.06	0.06	0.05	0.10	0.09	0.08	0.04	0.03	1.00	0.06	0.40	0.03	0.06	0.06	0.03	0.05
4429325	82	1	60	163	23	6	160	80	0	1	0	1	0	0	0	0	0	0	0	0	0	0	0	0	0	10.48	0.82	0.16	0.04	0.45	0.12	0.15	0.06	0.04	0.04	0.04	0.06	0.04	0.06	0.06	0.04	0.58	0.05	0.52	0.05	0.08	0.04	0.03	0.07
4432141	60	1	71	175	23	8	140	85	1	0	0	0	0	1	0	0	1	0	0	0	0	0	0	0	0	18.39	2.84	0.27	0.12	1.51	0.16	0.40	0.08	0.09	0.06	0.12	0.13	0.06	0.06	0.05	0.05	1.21	0.07	0.66	0.07	0.07	0.06	0.07	0.14
4416377	57	1	63	165	23	12	110	66	0	0	0	0	0	0	0	0	1	0	0	0	0	0	0	0	0	13.41	1.58	0.15	0.10	1.09	0.15	0.23	0.06	0.06	0.03	0.04	0.03	0.02	0.03	0.04	0.09	0.88	0.07	0.64	0.04	0.13	0.05	0.05	0.04
4390664	62	1	68	178	21	0	118	78	0	0	0	1	1	0	0	0	1	1	0	0	0	0	0	0	0	9.51	0.82	0.20	0.06	0.51	0.13	0.24	0.12	0.05	0.06	0.12	0.18	0.06	0.10	0.05	0.05	0.71	0.08	0.39	0.05	0.08	0.10	0.04	0.14
4352839	69	1	59	162	22	19	138	74	1	0	0	1	0	0	0	0	1	1	0	0	0	1	1	0	1	12.83	1.08	0.18	0.06	0.48	0.09	0.13	0.08	0.05	0.04	0.08	0.20	0.14	0.10	0.05	0.04	0.89	0.06	0.49	0.05	0.06	0.07	0.05	0.18
4457963	30	1	54	165	20	0	114	85	0	0	0	1	0	0	0	0	1	0	0	0	0	0	0	0	0	6.13	0.58	0.06	0.06	0.40	0.07	0.23	0.00	0.04	0.03	0.03	0.02	0.04	0.05	0.04	0.02	0.92	0.02	0.38	0.03	0.10	0.04	0.03	0.06
4413797	53	1	67	168	24	4	154	100	0	0	0	1	0	0	0	0	1	0	0	0	0	0	0	0	0	12.85	1.40	0.27	0.08	0.74	0.16	0.26	0.13	0.08	0.03	0.06	0.07	0.04	0.06	0.05	0.06	0.74	0.06	0.35	0.05	0.15	0.07	0.05	0.06
4417530	40	1	67	168	24	0	122	84	0	0	0	1	1	0	0	0	1	1	0	0	0	0	0	0	0	10.57	1.25	0.33	0.12	1.45	0.18	0.34	0.09	0.08	0.04	0.06	0.09	0.05	0.05	0.07	0.08	0.84	0.07	0.44	0.05	0.08	0.06	0.05	0.10
4453313	55	1	67	172	23	10	124	86	0	0	0	0	0	1	0	0	1	1	0	0	0	0	0	0	0	5.54	0.85	0.12	0.09	0.58	0.12	0.33	0.04	0.06	0.03	0.05	0.07	0.04	0.04	0.06	0.02	0.70	0.04	0.40	0.04	0.04	0.05	0.03	0.04
4386120	49	1	82	162	31	5	148	93	0	0	0	1	1	0	0	0	1	1	0	0	1	0	1	0	0	5.53	1.48	0.21	0.07	0.38	0.21	0.36	0.03	0.09	0.09	0.05	0.14	0.09	0.06	0.08	0.03	1.11	0.06	0.49	0.06	0.06	0.05	0.03	0.06
4451790	70	1	59	172	20	0	74	50	0	0	0	0	0	0	0	0	1	1	0	0	0	0	0	0	0	10.31	1.00	0.18	0.09	0.76	0.13	0.22	0.10	0.04	0.04	0.10	0.22	0.11	0.08	0.14	0.02	1.05	0.07	0.37	0.04	0.04	0.02	0.02	0.14
4389607	33	1	74	172	25	8	124	88	0	0	0	1	1	0	0	1	1	0	0	0	0	0	0	0	0	13.16	1.38	0.15	0.12	0.49	0.10	0.15	0.11	0.05	0.05	0.07	0.09	0.08	0.08	0.06	0.03	1.01	0.03	0.58	0.06	0.07	0.11	0.06	0.16
4415920	38	1	77	173	26	5	158	96	0	0	0	0	1	0	0	0	1	1	0	0	0	0	0	0	0	15.43	2.65	0.17	0.11	1.06	0.13	0.24	0.10	0.07	0.05	0.06	0.07	0.05	0.05	0.05	0.07	0.89	0.06	0.54	0.05	0.12	0.05	0.05	0.08
4394053	51	1	55	155	23	2	133	86	0	0	0	1	1	1	0	0	1	0	0	0	0	0	0	0	0	7.23	1.31	0.27	0.06	0.73	0.25	0.20	0.10	0.07	0.02	0.04	0.04	0.04	0.06	0.04	0.05	0.80	0.06	0.30	0.04	0.09	0.08	0.05	0.09
4411574	67	1	58	160	23	1	165	90	0	0	0	0	0	0	0	0	1	0	0	0	0	0	0	0	0	18.68	2.08	0.29	0.15	0.55	0.17	0.19	0.10	0.08	0.06	0.06	0.08	0.05	0.10	0.03	0.07	1.13	0.07	0.62	0.03	0.11	0.07	0.06	0.07
4447158	54	1	92	178	29	15	155	112	0	0	0	1	1	0	0	0	1	1	0	0	0	1	1	0	0	10.47	1.86	0.25	0.35	0.82	0.19	0.38	0.07	0.10	0.05	0.05	0.07	0.05	0.08	0.06	0.04	0.72	0.10	0.45	0.07	0.08	0.08	0.05	0.10
4388605	67	1	70	160	27	0	125	78	0	0	0	0	1	1	0	1	0	1	0	0	0	1	0	0	0	8.65	1.12	0.17	0.06	0.89	0.13	0.27	0.09	0.03	0.08	0.11	0.19	0.07	0.10	0.02	0.02	0.81	0.04	0.26	0.03	0.04	0.04	0.02	0.08
4393473	53	1	60	163	23	0	162	80	1	1	0	1	0	0	0	0	1	0	0	0	0	1	1	0	0	8.46	1.23	0.26	0.07	0.26	0.13	0.23	0.06	0.05	0.05	0.03	0.09	0.04	0.04	0.04	0.03	0.55	0.03	0.21	0.05	0.04	0.04	0.04	0.06
4386923	76	1	60	157	24	8	194	69	0	0	0	1	1	0	0	0	1	0	0	0	0	1	0	0	0	8.82	1.17	0.19	0.06	0.54	0.07	0.20	0.11	0.09	0.08	0.10	0.22	0.09	0.11	0.03	0.03	1.07	0.10	0.37	0.03	0.06	0.02	0.03	0.08
4444142	26	1	57	178	18	3	99	83	0	0	0	0	1	0	0	0	1	0	0	0	0	0	0	0	0	10.96	1.10	0.18	0.28	0.33	0.13	0.27	0.02	0.07	0.01	0.04	0.05	0.03	0.05	0.05	0.03	0.81	0.04	0.58	0.08	0.08	0.05	0.03	0.04
4283711	72	1	64	163	24	2	149	99	0	0	0	0	1	0	0	0	0	1	0	0	0	0	0	0	0	9.58	0.95	0.09	0.13	0.42	0.08	0.28	0.12	0.06	0.05	0.12	0.21	0.12	0.07	0.07	0.05	0.63	0.04	0.37	0.05	0.07	0.04	0.03	0.13
4396344	57	1	50	158	20	14	130	70	0	0	0	1	0	0	0	0	1	1	0	0	0	0	0	0	0	8.95	1.25	0.13	0.06	0.66	0.16	0.38	0.07	0.04	0.04	0.04	0.04	0.04	0.06	0.05	0.06	1.05	0.06	0.35	0.04	0.07	0.07	0.08	0.07
4410526	51	1	80	175	26	10	100	60	0	0	0	1	0	0	0	0	1	1	0	0	1	0	0	0	0	11.36	1.51	0.33	0.09	0.39	0.19	0.17	0.16	0.04	0.04	0.06	0.07	0.05	0.05	0.03	0.05	0.74	0.05	0.55	0.04	0.14	0.08	0.05	0.06
4407545	60	1	60	166	22	21	157	81	0	0	0	1	1	0	0	0	1	1	0	0	0	1	0	0	0	16.41	2.15	0.18	0.09	0.75	0.16	0.18	0.11	0.06	0.04	0.06	0.07	0.05	0.04	0.04	0.06	0.79	0.06	0.41	0.03	0.10	0.05	0.04	0.07
4397336	36	1	84	168	30	0	153	95	0	0	0	1	1	0	0	0	1	1	0	0	0	0	0	0	0	11.35	2.74	0.25	0.10	0.65	0.23	0.27	0.10	0.05	0.05	0.07	0.09	0.04	0.08	0.07	0.08	1.31	0.06	0.40	0.04	0.09	0.06	0.05	0.09
4452893	58	1	76	170	26	0	111	69	0	0	0	1	0	0	0	0	1	1	0	0	0	0	0	0	0	9.82	1.23	0.16	0.11	0.95	0.17	0.32	0.06	0.09	0.04	0.05	0.08	0.07	0.07	0.08	0.02	1.15	0.05	0.47	0.03	0.08	0.05	0.03	0.10
4315641	63	1	74	170	26	1	158	90	0	0	0	0	1	0	0	1	1	1	0	0	0	0	0	0	0	10.39	1.53	0.19	0.06	0.60	0.13	0.23	0.16	0.05	0.06	0.14	0.18	0.06	0.05	0.05	0.05	0.75	0.06	0.36	0.04	0.10	0.06	0.05	0.13
4459058	66	1	95	186	27	0	134	70	0	0	0	1	0	0	0	0	1	1	0	0	0	0	0	0	0	5.89	1.37	0.17	0.09	0.24	0.15	0.31	0.06	0.08	0.02	0.06	0.08	0.06	0.07	0.11	0.03	1.28	0.05	0.56	0.05	0.06	0.04	0.04	0.14
4411920	56	1	54	154	23	0	170	80	0	0	0	0	0	0	0	0	0	0	0	0	0	0	0	0	0	9.19	1.09	0.20	0.10	0.57	0.19	0.40	0.11	0.08	0.04	0.06	0.05	0.04	0.05	0.04	0.03	0.74	0.05	0.34	0.03	0.08	0.06	0.04	0.05
4406709	52	1	78	172	26	0	146	86	0	0	0	0	0	0	0	0	1	0	0	0	0	0	0	0	0	13.30	2.11	0.34	0.13	0.97	0.39	0.40	0.08	0.07	0.06	0.05	0.05	0.03	0.05	0.06	0.09	0.97	0.08	0.43	0.05	0.12	0.06	0.06	0.06
4398165	76	1	54	160	21	12	127	71	1	0	0	1	0	1	0	0	1	1	0	0	0	0	0	0	0	9.01	1.18	0.17	0.08	0.57	0.09	0.17	0.15	0.05	0.06	0.12	0.24	0.06	0.05	0.04	0.03	0.67	0.07	0.36	0.03	0.08	0.06	0.04	0.17
4446813	65	1	57	163	21	17	103	93	1	0	0	0	0	0	0	0	1	1	0	0	0	0	0	0	0	13.41	2.00	0.20	0.07	0.82	0.16	0.22	0.06	0.07	0.04	0.04	0.05	0.04	0.07	0.04	0.06	0.68	0.07	0.48	0.06	0.07	0.08	0.04	0.07
4404071	60	1	90	165	33	0	164	77	0	0	0	0	0	0	0	0	1	0	0	0	0	0	0	0	0	15.39	1.73	0.22	0.12	0.84	0.11	0.39	0.27	0.07	0.09	0.17	0.27	0.09	0.05	0.07	0.07	0.80	0.06	0.38	0.09	0.11	0.09	0.06	0.18
4389738	51	1	68	168	24	1	124	72	0	0	0	1	1	1	0	0	1	0	0	0	0	0	0	0	0	8.10	1.42	0.25	0.06	0.39	0.33	0.22	0.07	0.05	0.04	0.04	0.06	0.07	0.09	0.06	0.03	0.89	0.06	0.36	0.04	0.08	0.07	0.04	0.08
4397769	62	1	58	164	22	0	132	94	0	0	0	1	0	0	0	0	1	1	0	0	0	0	0	0	0	17.26	3.66	0.37	0.17	1.01	0.17	0.44	0.21	0.10	0.03	0.08	0.09	0.05	0.07	0.05	0.06	1.21	0.06	0.57	0.06	0.05	0.14	0.09	0.11
4381502	46	1	76	155	32	3	121	83	0	0	0	1	0	0	0	0	1	0	0	0	0	0	0	0	0	8.76	1.69	0.25	0.11	0.83	0.20	0.46	0.12	0.06	0.14	0.24	0.50	0.17	0.07	0.04	0.02	0.90	0.04	0.41	0.04	0.05	0.06	0.03	0.16
4446165	60	1	72	174	24	13	125	87	0	0	0	1	0	0	0	1	1	1	0	0	0	0	0	0	0	11.54	1.50	0.19	0.06	0.51	0.14	0.18	0.07	0.11	0.04	0.04	0.06	0.04	0.05	0.04	0.04	0.37	0.05	0.38	0.06	0.08	0.08	0.04	0.06
4390532	47	1	80	176	26	0	121	82	0	0	0	1	1	1	0	0	1	1	0	0	0	0	0	0	0	10.91	1.58	0.23	0.10	0.50	0.13	0.34	0.12	0.06	0.06	0.15	0.28	0.11	0.09	0.04	0.05	1.21	0.04	0.53	0.08	0.11	0.07	0.05	0.13
4385304	28	1	69	166	25	0	130	82	0	0	0	1	1	0	0	0	1	1	1	1	0	0	0	0	0	6.60	1.28	0.16	0.15	0.36	0.26	0.27	0.09	0.07	0.06	0.11	0.22	0.15	0.10	0.04	0.05	0.92	0.03	0.27	0.04	0.05	0.08	0.03	0.09
4417781	63	1	60	165	22	0	160	78	1	0	0	0	0	0	0	0	0	1	0	0	0	1	0	0	1	14.75	1.57	0.22	0.08	0.96	0.18	0.26	0.04	0.07	0.03	0.04	0.06	0.02	0.06	0.03	0.03	1.04	0.05	0.48	0.05	0.06	0.07	0.03	0.04
4395252	33	1	85	177	27	6	119	75	0	0	0	0	1	1	0	0	1	0	1	0	0	0	0	0	0	12.15	1.76	0.20	0.10	0.58	0.12	0.26	0.16	0.04	0.07	0.17	0.28	0.06	0.06	0.05	0.04	0.93	0.05	0.32	0.07	0.06	0.14	0.10	0.13
4440767	63	1	56	150	25	15	158	100	0	0	0	1	0	0	0	0	1	1	0	0	0	0	0	0	0	16.07	1.74	0.13	0.12	0.55	0.08	0.18	0.05	0.00	0.03	0.04	0.07	0.08	0.13	0.06	0.06	0.89	0.06	0.34	0.03	0.10	0.05	0.02	0.12
4459319	62	1	63	163	24	20	116	68	0	0	0	1	1	1	0	0	1	0	0	0	0	0	0	0	0	4.52	0.55	0.09	0.07	0.53	0.15	0.21	0.00	0.05	0.01	0.04	0.04	0.06	0.04	0.07	0.04	0.54	0.03	0.29	0.02	0.05	0.04	0.02	0.08
4113789	61	1	64	170	22	20	148	93	0	0	0	1	0	0	0	0	1	0	0	0	0	0	0	0	0	7.14	1.16	0.23	0.06	0.40	0.10	0.32	0.09	0.06	0.12	0.11	0.24	0.08	0.15	0.08	0.07	1.00	0.10	0.69	0.13	0.09	0.04	0.03	0.07
4428302	53	1	64	160	25	0	134	86	0	0	0	0	0	0	0	0	1	0	0	0	0	0	0	0	0	9.13	1.28	0.13	0.09	1.69	0.09	0.18	0.03	0.07	0.04	0.03	0.02	0.03	0.04	0.03	0.03	0.57	0.05	0.38	0.12	0.07	0.04	0.02	0.05
4354465	53	1	60	155	25	13	128	82	1	0	0	0	0	0	0	0	1	0	0	0	0	1	0	0	0	8.15	1.00	0.17	0.09	0.79	0.10	0.18	0.10	0.05	0.07	0.14	0.18	0.11	0.06	0.03	0.03	0.90	0.04	0.51	0.06	0.05	0.12	0.03	0.09
4180485	58	1	66	161	25	5	122	77	0	0	0	1	0	0	0	0	0	0	0	0	0	0	0	0	0	13.09	1.18	0.20	0.12	2.19	0.19	0.24	0.16	0.08	0.09	0.10	0.12	0.07	0.07	0.12	0.07	0.87	0.07	0.44	0.07	0.08	0.09	0.05	0.19
4418599	50	1	60	165	22	0	138	92	0	0	0	0	1	0	0	0	1	0	0	0	0	0	1	0	0	7.42	2.40	0.09	0.08	0.64	0.12	0.14	0.05	0.05	0.03	0.03	0.07	0.04	0.06	0.07	0.06	0.97	0.06	0.48	0.03	0.05	0.06	0.03	0.06
4321204	78	1	48	170	17	10	151	82	0	1	0	0	0	0	0	0	1	0	0	0	0	1	0	0	0	15.78	2.21	0.25	0.10	0.44	0.19	0.27	0.19	0.06	0.06	0.15	0.25	0.07	0.12	0.07	0.05	1.31	0.10	0.56	0.05	0.10	0.07	0.07	0.16
4430931	65	1	82	165	30	8	192	92	0	0	0	0	0	0	0	0	0	1	0	0	0	1	0	0	0	10.55	1.34	0.17	0.06	0.82	0.09	0.16	0.06	0.11	0.05	0.04	0.06	0.04	0.05	0.03	0.04	0.84	0.04	0.27	0.05	0.04	0.04	0.03	0.07
4429711	57	1	70	175	23	15	120	80	1	0	心功能III级	0	0	0	0	0	1	1	0	0	1	0	0	1	1	22.21	1.88	0.25	0.10	1.23	0.12	0.36	0.06	0.10	0.06	0.11	0.09	0.05	0.09	0.03	0.04	1.32	0.06	0.66	0.06	0.13	0.07	0.05	0.11
4130110	70	1	67	160	26	20	184	89	0	0	0	0	0	0	0	0	1	0	0	0	0	1	0	0	0	7.35	1.34	0.14	0.08	0.52	0.14	0.21	0.03	0.06	0.04	0.02	0.06	0.02	0.05	0.03	0.01	0.97	0.03	0.55	0.05	0.04	0.03	0.02	0.04
4407619	50	1	76	173	25	4	163	63	0	0	0	1	1	1	0	0	1	0	0	0	0	0	0	0	0	16.22	2.35	0.25	0.14	1.40	0.21	0.29	0.10	0.06	0.05	0.05	0.08	0.04	0.05	0.03	0.08	1.06	0.08	0.52	0.04	0.10	0.06	0.08	0.06
4042663	47	1	82	179	26	10	110	75	0	0	0	0	1	0	0	0	1	0	0	0	0	0	0	0	0	11.84	1.31	0.15	0.09	0.54	0.09	0.27	0.08	0.05	0.03	0.04	0.04	0.04	0.04	0.03	0.04	0.75	0.04	0.41	0.05	0.06	0.06	0.08	0.07
4440164	28	1	67	178	21	0	94	60	0	0	0	1	1	0	0	0	1	0	0	0	0	0	0	0	0	11.22	0.85	0.17	0.07	0.66	0.20	0.42	0.06	0.09	0.02	0.04	0.05	0.03	0.06	0.05	0.03	1.30	0.08	0.83	0.06	0.09	0.06	0.04	0.05
4393128	31	1	63	160	25	0	124	89	0	0	0	0	0	0	0	0	1	0	0	0	0	0	0	0	0	4.44	0.57	0.08	0.05	0.50	0.06	0.14	0.09	0.04	0.04	0.06	0.06	0.05	0.05	0.08	0.04	0.61	0.07	0.21	0.02	0.06	0.07	0.04	0.08
4465464	54	1	105	178	33	3	132	82	0	0	0	1	1	0	0	0	1	0	0	0	0	1	0	0	0	7.52	1.58	0.20	0.18	0.34	0.19	0.58	0.00	0.11	0.07	0.04	0.03	0.05	0.11	0.07	0.02	0.85	0.12	0.59	0.04	0.07	0.06	0.03	0.11
4429995	55	1	80	170	28	0	125	80	0	0	0	0	0	0	0	0	0	1	0	0	0	0	0	0	0	12.09	2.23	0.34	0.08	0.70	0.18	0.27	0.07	0.09	0.04	0.04	0.04	0.02	0.05	0.05	0.04	0.67	0.06	0.40	0.06	0.08	0.05	0.04	0.10
4461840	42	1	62	162	24	9	114	77	0	0	0	1	1	0	0	0	1	1	0	0	0	0	0	0	0	7.01	1.18	0.14	0.09	0.44	0.12	0.48	0.03	0.05	0.03	0.03	0.04	0.04	0.06	0.06	0.03	0.67	0.03	0.44	0.04	0.08	0.03	0.02	0.06
4384997	58	1	76	175	25	0	144	89	0	0	0	1	1	0	0	0	1	0	1	1	0	0	1	0	0	4.93	1.23	0.18	0.07	0.51	0.14	0.28	0.08	0.06	0.08	0.06	0.07	0.24	0.15	0.03	0.07	1.26	0.05	0.51	0.06	0.05	0.06	0.04	0.09
4465593	51	1	85	175	28	9	144	64	1	0	0	0	0	0	0	0	0	1	0	0	0	0	1	0	1	10.18	1.95	0.28	0.08	0.64	0.16	0.44	0.04	0.13	0.08	0.06	0.07	0.00	0.08	0.10	0.03	1.10	0.09	0.70	0.05	0.07	0.05	0.03	0.14
4405223	45	1	89	173	30	0	111	71	0	0	0	0	0	0	0	0	1	0	0	0	0	0	0	0	0	16.90	4.40	0.43	0.22	0.78	0.25	0.46	0.10	0.09	0.05	0.06	0.09	0.05	0.06	0.07	0.10	1.39	0.13	0.49	0.06	0.11	0.07	0.05	0.13
4385770	55	1	73	170	25	3	150	100	0	1	0	1	1	0	0	0	1	1	0	0	1	0	0	0	0	9.29	2.78	0.32	0.11	0.68	0.27	0.47	0.10	0.04	0.08	0.08	0.10	0.09	0.09	0.05	0.07	1.22	0.10	0.54	0.08	0.07	0.09	0.02	0.07
4411853	35	1	87	168	31	0	148	102	0	0	0	0	1	0	0	0	1	0	0	0	0	0	0	0	0	18.67	3.89	0.43	0.31	1.26	0.37	0.38	0.24	0.15	0.06	0.08	0.13	0.10	0.08	0.06	0.08	0.90	0.09	0.34	0.05	0.13	0.07	0.07	0.14
4397934	36	1	68	170	24	0	106	71	0	0	0	1	0	1	0	0	1	0	1	0	0	0	0	0	0	8.74	1.83	0.31	0.15	0.29	0.15	0.20	0.09	0.05	0.04	0.06	0.07	0.04	0.05	0.05	0.05	0.69	0.10	0.40	0.07	0.08	0.13	0.08	0.07
4403410	38	1	72	177	23	0	148	94	0	0	0	1	1	0	0	0	1	1	0	0	0	1	0	0	0	14.53	2.25	0.22	0.18	0.61	0.15	0.34	0.10	0.05	0.04	0.04	0.05	0.04	0.03	0.07	0.07	0.79	0.06	0.34	0.05	0.12	0.11	0.07	0.11
4424878	48	1	81	173	27	1	130	102	0	0	0	0	0	0	0	0	1	0	0	0	0	0	0	0	0	11.98	2.23	0.28	0.09	0.81	0.17	0.30	0.06	0.08	0.06	0.04	0.06	0.05	0.07	0.04	0.05	0.70	0.07	0.57	0.23	0.10	0.05	0.03	0.10
4451755	58	1	50	160	20	0	185	82	1	0	0	0	1	1	0	0	0	0	0	0	0	0	1	0	0	6.81	0.61	0.08	0.05	0.49	0.06	0.10	0.03	0.03	0.02	0.02	0.05	0.04	0.04	0.08	0.02	0.75	0.03	0.29	0.03	0.04	0.02	0.01	0.03
4387920	32	1	74	174	24	5	139	87	0	0	0	1	1	0	0	0	1	0	0	0	0	0	0	0	0	9.89	3.08	0.25	0.23	0.26	0.21	0.35	0.07	0.11	0.06	0.06	0.18	0.09	0.14	0.05	0.06	1.00	0.05	0.52	0.05	0.05	0.08	0.04	0.09
4350784	56	1	59	174	19	1	88	62	0	0	0	0	0	0	0	0	1	0	0	0	0	0	0	0	0	6.28	0.86	0.35	0.09	0.51	0.09	0.55	0.06	0.05	0.06	0.06	0.15	0.07	0.10	0.04	0.05	0.93	0.06	0.44	0.08	0.08	0.09	0.06	0.05
4416313	50	1	69	163	26	0	122	78	0	0	0	1	1	0	0	0	0	0	0	0	1	1	0	0	0	14.21	1.01	0.13	0.12	0.83	0.18	0.19	0.05	0.07	0.04	0.05	0.04	0.03	0.06	0.05	0.05	0.83	0.04	0.45	0.05	0.08	0.06	0.05	0.06
4081675	52	1	82	175	27	2	146	90	0	0	0	1	1	0	0	0	1	1	0	0	0	0	0	0	0	11.34	1.00	0.21	0.14	0.38	0.12	0.23	0.11	0.05	0.04	0.09	0.14	0.05	0.04	0.04	0.06	0.98	0.06	0.50	0.06	0.07	0.09	0.09	0.13
4397416	52	1	86	168	30	10	128	90	0	0	0	1	1	0	0	0	1	1	0	0	0	0	0	0	0	14.19	2.57	0.23	0.08	1.14	0.22	0.32	0.08	0.07	0.05	0.07	0.05	0.05	0.04	0.03	0.06	0.88	0.07	0.56	0.06	0.10	0.08	0.06	0.09
4396817	68	1	63	160	25	9	183	87	0	0	0	1	0	0	0	0	1	0	0	0	0	0	0	0	0	16.11	0.80	0.13	0.09	0.33	0.17	0.23	0.07	0.04	0.03	0.03	0.04	0.04	0.08	0.08	0.06	1.02	0.06	0.55	0.05	0.09	0.05	0.05	0.08
4363410	70	1	65	162	25	8	90	69	1	0	0	0	0	0	0	0	1	0	0	0	0	0	0	0	0	5.04	0.60	0.13	0.05	0.78	0.10	0.15	0.05	0.04	0.03	0.04	0.04	0.03	0.03	0.03	0.02	0.55	0.03	0.21	0.04	0.05	0.05	0.03	0.06
4365279	61	1	82	175	27	5	114	62	1	1	0	1	0	0	0	0	0	1	0	0	0	0	1	0	0	8.71	0.92	0.19	0.07	0.27	0.10	0.15	0.11	0.05	0.04	0.05	0.11	0.04	0.04	0.03	0.03	0.63	0.06	0.27	0.04	0.06	0.04	0.03	0.06
4454417	63	1	76	171	26	8	147	87	0	0	0	0	1	0	0	0	1	1	0	0	0	0	0	0	0	7.74	1.17	0.15	0.07	0.45	0.14	0.31	0.04	0.07	0.04	0.06	0.06	0.05	0.06	0.06	0.03	0.78	0.05	0.48	0.07	0.08	0.06	0.03	0.09
4441708	58	1	57	170	20	15	115	76	0	0	0	0	0	0	0	0	0	0	0	0	0	0	0	0	0	12.88	1.43	0.28	0.15	0.40	0.14	0.41	0.07	0.12	0.05	0.09	0.07	0.03	0.05	0.07	0.02	0.61	0.02	0.38	0.04	0.06	0.04	0.02	0.12
4416057	50	1	80	177	26	0	130	80	0	0	0	1	1	0	0	0	0	1	0	0	0	0	1	0	0	16.19	2.63	0.29	0.13	0.74	0.18	0.31	0.12	0.09	0.06	0.08	0.06	0.05	0.05	0.04	0.06	1.04	0.09	0.60	0.06	0.09	0.05	0.06	0.08
4410447	60	1	72	150	32	0	157	84	0	1	0	1	1	1	0	0	1	1	0	0	0	1	0	0	0	17.41	2.10	0.32	0.10	0.89	0.24	0.22	0.09	0.06	0.06	0.07	0.11	0.04	0.05	0.04	0.06	1.02	0.04	0.47	0.04	0.08	0.05	0.04	0.12
4430938	41	1	74	172	25	0	123	83	0	0	0	0	0	0	0	0	1	0	0	0	0	0	0	0	0	9.32	2.31	0.19	0.08	1.01	0.13	0.24	0.08	0.07	0.05	0.12	0.07	0.04	0.05	0.05	0.05	1.31	0.06	0.57	0.05	0.07	0.07	0.05	0.12
4116849	75	1	83	182	25	10	162	100	0	1	0	1	0	0	0	0	1	1	0	0	0	0	0	0	0	18.09	1.94	0.29	0.10	0.64	0.15	0.21	0.06	0.07	0.05	0.09	0.08	0.04	0.09	0.05	0.06	1.35	0.11	0.44	0.05	0.06	0.07	0.05	0.10
4457394	54	1	88	173	30	10	157	80	0	0	0	1	1	0	0	0	1	0	0	0	1	0	0	0	0	5.21	0.90	0.12	0.07	0.45	0.12	0.43	0.04	0.06	0.00	0.02	0.04	0.06	0.10	0.06	0.03	0.98	0.03	0.42	0.03	0.05	0.03	0.03	0.06
4450656	46	1	68	168	24	1	118	83	0	0	0	0	1	1	0	0	0	0	0	0	0	0	0	0	0	6.08	0.77	0.07	0.03	0.38	0.09	0.14	0.02	0.04	0.02	0.03	0.03	0.02	0.05	0.05	0.03	0.63	0.03	0.25	0.04	0.06	0.03	0.02	0.04
4146232	75	1	57	155	24	20	153	73	0	0	0	0	0	0	0	0	1	0	0	0	0	0	0	0	0	6.27	0.54	0.10	0.04	0.39	0.06	0.10	0.06	0.05	0.03	0.04	0.08	0.05	0.06	0.03	0.03	0.77	0.04	0.35	0.03	0.05	0.06	0.03	0.07
4457302	63	1	90	178	28	17	130	80	1	0	0	1	1	1	0	0	1	0	0	0	0	1	1	0	0	4.85	0.53	0.10	0.05	0.68	0.09	0.17	0.03	0.05	0.03	0.03	0.07	0.06	0.05	0.02	0.01	0.45	0.02	0.18	0.02	0.06	0.05	0.02	0.07
4421340	56	1	75	167	27	12	116	78	0	0	0	1	1	1	0	0	1	1	0	0	0	0	0	0	0	9.04	1.38	0.12	0.09	0.95	0.09	0.32	0.05	0.07	0.02	0.03	0.03	0.04	0.04	0.04	0.05	1.05	0.07	0.62	0.06	0.08	0.07	0.04	0.08
4388273	63	1	64	156	26	16	144	66	0	0	0	1	0	0	0	0	1	1	0	0	0	0	1	0	0	7.44	0.82	0.17	0.07	1.32	0.11	0.57	0.08	0.08	0.12	0.16	0.32	0.20	0.13	0.06	0.03	0.88	0.04	0.43	0.05	0.09	0.08	0.04	0.18
4388857	44	1	80	170	28	9	128	83	0	0	0	1	1	0	0	0	1	1	0	0	0	0	0	0	0	9.10	1.68	0.28	0.16	0.64	0.28	0.48	0.06	0.07	0.09	0.09	0.15	0.16	0.11	0.08	0.01	1.00	0.05	0.57	0.06	0.10	0.07	0.06	0.09
4414571	56	1	65	155	27	10	153	85	0	1	0	1	1	0	0	0	1	1	0	0	0	1	0	1	0	17.79	1.72	0.19	0.12	1.42	0.14	0.19	0.23	0.12	0.05	0.17	0.28	0.12	0.10	0.11	0.11	1.11	0.12	0.47	0.07	0.14	0.07	0.06	0.17
4409239	53	1	74	170	26	0	149	78	0	0	0	0	0	0	0	0	0	0	0	0	0	0	1	0	0	15.58	1.65	0.17	0.17	0.82	0.17	0.41	0.14	0.05	0.05	0.06	0.07	0.08	0.07	0.06	0.05	0.81	0.05	0.43	0.04	0.14	0.08	0.07	0.07
4411978	59	1	60	166	22	3	154	75	1	0	0	0	0	0	0	0	1	1	0	0	0	0	1	0	0	13.88	1.82	0.28	0.10	1.50	0.22	0.31	0.07	0.05	0.04	0.04	0.04	0.03	0.05	0.02	0.04	0.83	0.05	0.47	0.04	0.10	0.05	0.04	0.05
4393370	60	1	58	155	24	0	89	59	1	0	0	1	0	0	0	0	0	1	0	0	0	0	0	0	0	8.56	0.96	0.20	0.08	0.55	0.09	0.14	0.13	0.05	0.04	0.05	0.10	0.06	0.08	0.05	0.04	0.90	0.08	0.39	0.02	0.09	0.09	0.08	0.06
4445630	66	1	81	175	26	8	147	82	1	0	0	0	0	0	0	0	1	1	0	0	1	0	0	0	0	9.57	1.54	0.19	0.09	0.52	0.12	0.21	0.08	0.04	0.04	0.08	0.12	0.09	0.11	0.05	0.04	1.25	0.05	0.52	0.05	0.06	0.03	0.02	0.13
4344047	66	1	65	163	24	0	130	80	1	0	0	0	1	0	0	0	0	1	0	0	0	0	0	0	0	17.44	1.19	0.19	0.15	0.46	0.11	0.24	0.19	0.06	0.16	0.42	0.82	0.28	0.17	0.06	0.06	1.47	0.09	0.48	0.04	0.09	0.09	0.05	0.45
4244861	52	1	100	175	33	3	99	62	0	0	0	0	1	0	0	0	0	0	1	0	0	0	0	0	0	12.41	2.97	0.31	0.13	0.51	0.22	0.42	0.12	0.06	0.14	0.11	0.25	0.26	0.11	0.06	0.05	1.09	0.22	0.62	0.04	0.10	0.06	0.06	0.12
4463941	22	1	94	180	29	4	126	77	0	0	0	0	0	0	0	0	1	0	0	0	0	0	0	0	0	10.29	0.95	0.16	0.24	0.38	0.13	0.75	0.05	0.10	0.00	0.03	0.05	0.05	0.05	0.05	0.03	0.97	0.06	0.33	0.05	0.05	0.05	0.03	0.09
4393446	49	1	68	170	24	17	122	66	0	0	0	1	1	0	0	0	1	0	0	0	0	0	0	0	0	11.27	1.37	0.18	0.08	0.89	0.16	0.40	0.07	0.03	0.08	0.07	0.14	0.05	0.08	0.05	0.04	0.68	0.06	0.37	0.05	0.06	0.08	0.07	0.09
4390386	52	1	74	165	27	0	106	82	0	0	0	0	1	1	0	0	1	1	0	0	0	0	0	0	0	10.96	1.45	0.25	0.10	1.71	0.14	0.57	0.13	0.10	0.07	0.08	0.14	0.08	0.07	0.10	0.05	0.78	0.06	0.47	0.06	0.11	0.07	0.06	0.15
4417670	34	1	105	183	31	3	141	94	0	0	0	1	1	1	0	0	1	0	0	0	0	0	0	0	0	15.97	1.58	0.17	0.12	0.88	0.14	0.32	0.07	0.09	0.05	0.06	0.11	0.04	0.05	0.04	0.06	1.39	0.09	0.63	0.04	0.08	0.05	0.05	0.12
4396354	64	1	63	170	22	2	90	57	0	0	0	0	0	1	1	0	1	1	0	0	0	0	0	0	0	5.72	0.64	0.06	0.05	0.25	0.06	0.12	0.05	0.02	0.02	0.04	0.07	0.02	0.04	0.04	0.03	0.58	0.02	0.31	0.02	0.06	0.04	0.04	0.05
4453025	45	1	74	160	29	1	140	89	0	0	0	1	1	0	0	0	1	0	0	0	1	1	0	0	0	7.79	1.21	0.11	0.06	0.94	0.10	0.25	0.02	0.03	0.03	0.03	0.04	0.03	0.04	0.06	0.03	0.63	0.03	0.28	0.02	0.04	0.03	0.02	0.05
4464223	56	1	105	175	34	4	129	88	0	0	0	1	1	1	1	0	1	0	0	0	0	0	1	0	0	6.52	1.80	0.10	0.06	0.28	0.09	0.35	0.04	0.08	0.02	0.05	0.05	0.05	0.07	0.04	0.02	0.82	0.03	0.38	0.05	0.05	0.03	0.02	0.08
4387659	27	1	80	171	27	6	105	74	0	0	0	1	1	0	0	0	1	1	0	0	0	0	1	0	0	6.20	2.12	0.17	0.11	1.06	0.16	0.32	0.03	0.07	0.11	0.12	0.12	0.09	0.09	0.04	0.04	0.65	0.05	0.41	0.03	0.05	0.06	0.03	0.09
4333713	50	1	75	174	25	9	119	75	1	0	0	1	0	0	0	0	1	0	0	0	0	0	0	0	1	5.18	1.32	0.39	0.09	0.35	0.16	0.24	0.05	0.09	0.07	0.05	0.06	0.09	0.15	0.06	0.06	0.94	0.08	0.55	0.06	0.07	0.05	0.02	0.05
4390563	32	1	107	183	32	1	130	90	0	0	0	1	1	0	0	0	1	0	0	0	0	0	0	0	0	9.13	2.00	0.30	0.07	0.92	0.26	0.37	0.08	0.06	0.05	0.06	0.07	0.05	0.07	0.09	0.06	0.83	0.05	0.48	0.05	0.06	0.08	0.04	0.09
4404727	67	1	56	164	21	0	126	73	0	0	0	0	0	0	0	0	0	0	0	0	0	1	0	0	0	10.03	0.84	0.16	0.07	0.82	0.08	0.19	0.13	0.04	0.05	0.09	0.12	0.03	0.04	0.05	0.06	0.44	0.04	0.32	0.07	0.10	0.13	0.05	0.08
4387810	55	1	69	163	26	16	139	80	0	0	0	1	0	0	0	0	1	0	0	0	0	0	0	0	0	6.37	0.66	0.20	0.10	0.87	0.11	0.39	0.07	0.05	0.08	0.13	0.28	0.06	0.07	0.05	0.03	0.81	0.03	0.50	0.10	0.10	0.09	0.03	0.15
4386015	62	1	84	170	29	0	180	90	0	0	0	1	1	0	0	0	1	1	0	0	1	0	1	0	0	6.30	1.49	0.17	0.04	0.55	0.18	0.24	0.13	0.08	0.10	0.20	0.19	0.13	0.14	0.06	0.09	1.02	0.07	0.55	0.09	0.11	0.05	0.04	0.14
4446062	51	1	77	170	27	3	148	79	0	0	0	0	0	0	0	0	1	0	0	0	0	0	0	0	0	14.97	2.57	0.35	0.21	0.62	0.20	0.47	0.06	0.11	0.03	0.05	0.06	0.04	0.10	0.09	0.04	1.14	0.05	0.59	0.09	0.12	0.10	0.04	0.11
4420998	37	1	110	170	38	0	149	84	0	0	0	0	1	0	0	0	1	0	0	0	0	0	0	0	0	9.90	1.23	0.18	0.09	0.92	0.13	0.27	0.05	0.05	0.03	0.04	0.05	0.03	0.03	0.03	0.02	0.67	0.05	0.32	0.03	0.07	0.04	0.02	0.08
4385819	28	1	63	163	24	1	126	80	0	0	0	0	0	0	0	0	1	0	0	0	0	0	0	0	0	13.83	3.32	0.24	0.14	0.88	0.30	0.44	0.09	0.09	0.10	0.22	0.37	0.15	0.17	0.08	0.05	1.23	0.07	0.74	0.06	0.07	0.09	0.06	0.13
4385524	28	1	63	186	18	1	111	67	0	0	0	1	1	1	0	0	1	0	0	0	0	0	0	0	0	7.65	1.44	0.19	0.12	1.08	0.19	0.64	0.06	0.06	0.05	0.08	0.09	0.09	0.20	0.06	0.04	0.96	0.08	0.64	0.13	0.13	0.14	0.08	0.10
4444161	45	1	73	160	29	0	102	74	0	0	0	1	0	1	0	0	0	0	0	0	0	0	0	0	0	15.65	2.13	0.20	0.15	0.84	0.16	0.37	0.04	0.11	0.04	0.03	0.08	0.05	0.11	0.04	0.05	1.68	0.05	0.47	0.03	0.05	0.03	0.03	0.06
4464416	48	1	83	173	28	0	113	80	0	0	0	0	1	0	0	0	1	0	0	0	0	0	1	0	0	6.98	2.93	0.14	0.10	0.47	0.15	0.46	0.03	0.14	0.02	0.04	0.06	0.06	0.04	0.04	0.04	0.90	0.05	0.55	0.06	0.06	0.05	0.03	0.10
4462159	54	1	71	168	25	18	135	70	0	0	0	0	1	1	0	0	1	0	0	0	0	0	0	0	0	7.63	1.03	0.18	0.06	0.32	0.14	0.22	0.03	0.07	0.04	0.03	0.04	0.04	0.04	0.04	0.03	0.71	0.03	0.41	0.04	0.08	0.04	0.03	0.09
4466917	52	1	88	178	28	10	113	77	0	0	0	1	1	0	0	0	1	0	1	0	0	0	0	0	0	8.91	1.44	0.19	0.07	0.38	0.14	0.24	0.03	0.07	0.05	0.04	0.05	0.07	0.03	0.04	0.03	0.83	0.03	0.42	0.04	0.06	0.05	0.03	0.13
4182101	54	1	61	160	24	4	138	71	0	0	0	1	1	0	0	1	1	1	0	0	0	0	0	0	0	11.99	2.27	0.33	0.09	0.85	0.18	0.47	0.15	0.08	0.13	0.26	0.54	0.19	0.09	0.04	0.09	1.40	0.04	0.52	0.04	0.09	0.06	0.04	0.20
4217491	47	1	80	175	26	11	180	90	0	0	0	0	1	0	0	0	1	1	0	0	0	0	0	0	0	9.53	1.38	0.33	0.18	0.26	0.25	0.30	0.12	0.12	0.07	0.06	0.12	0.10	0.14	0.12	0.10	0.90	0.10	0.61	0.08	0.08	0.12	0.07	0.15
4387720	47	1	80	160	31	0	143	90	0	0	0	1	1	0	0	0	1	0	0	0	0	0	0	1	1	7.78	1.80	0.22	0.07	0.72	0.13	0.49	0.07	0.05	0.06	0.08	0.12	0.06	0.19	0.03	0.05	1.72	0.07	0.62	0.08	0.08	0.03	0.03	0.08
4387450	51	1	73	166	26	0	104	60	1	0	0	1	0	0	0	0	0	0	0	0	0	0	0	0	0	4.18	1.00	0.12	0.08	0.43	0.15	0.24	0.03	0.06	0.08	0.08	0.14	0.07	0.12	0.04	0.04	0.97	0.08	0.49	0.03	0.05	0.05	0.03	0.06
4383034	67	1	67	168	24	0	142	78	0	1	0	0	1	0	0	0	1	1	0	0	0	0	0	0	0	9.02	1.70	0.28	0.07	0.81	0.13	0.51	0.16	0.04	0.07	0.13	0.29	0.12	0.12	0.07	0.05	1.04	0.06	0.57	0.03	0.08	0.05	0.04	0.09
4458134	41	1	82	182	25	4	126	81	0	0	0	0	0	1	0	0	1	0	0	0	0	0	0	0	0	4.19	0.62	0.09	0.06	0.45	0.12	0.35	0.02	0.03	0.02	0.02	0.02	0.03	0.07	0.05	0.02	0.52	0.03	0.31	0.04	0.05	0.04	0.02	0.04
4383424	52	1	72	170	25	10	147	90	0	0	0	1	0	1	0	0	1	0	0	0	0	0	1	0	1	9.98	2.35	0.33	0.19	0.47	0.31	0.49	0.06	0.08	0.07	0.08	0.11	0.12	0.16	0.08	0.04	1.60	0.06	0.75	0.05	0.08	0.06	0.03	0.12
4173966	60	1	77	165	28	0	158	94	0	1	0	0	0	1	0	0	0	1	0	0	0	1	0	0	0	14.68	3.71	0.21	0.11	1.36	0.23	0.48	0.14	0.05	0.09	0.24	0.44	0.25	0.12	0.15	0.02	1.65	0.08	0.77	0.06	0.03	0.06	0.04	0.22
4377116	61	1	71	160	28	9	126	63	0	1	0	0	1	0	0	0	1	1	0	0	0	0	0	0	0	6.91	0.60	0.07	0.05	0.59	0.11	0.39	0.05	0.04	0.05	0.07	0.09	0.07	0.08	0.04	0.03	0.64	0.05	0.43	0.02	0.06	0.02	0.02	0.08
4419116	52	1	60	162	23	0	126	78	0	0	0	1	1	0	0	0	1	0	0	0	0	0	0	0	0	20.56	1.51	0.25	0.10	1.04	0.34	0.48	0.12	0.08	0.04	0.09	0.13	0.08	0.07	0.04	0.07	1.11	0.07	0.52	0.07	0.08	0.05	0.04	0.10
4438558	53	1	85	180	26	4	170	87	0	0	心功能Ⅳ级	0	0	0	0	0	1	1	0	0	0	0	1	1	1	20.55	0.77	0.30	0.34	0.47	0.12	0.15	0.42	0.00	0.12	0.25	0.35	0.13	0.07	0.10	0.05	0.70	0.05	0.38	0.05	0.07	0.03	0.02	0.33
4437973	49	1	65	165	24	10	175	93	0	0	1	0	0	0	0	0	0	0	0	0	0	1	1	0	0	58.64	0.78	0.79	0.70	0.66	0.30	0.33	1.40	0.30	0.24	0.50	0.55	0.23	0.23	0.35	0.09	1.99	0.12	1.00	0.15	0.12	0.09	0.03	0.31
4454311	71	1	74	162	28	10	164	80	1	1	1	0	0	0	0	0	1	0	0	0	0	1	1	0	1	11.12	0.44	0.39	0.16	0.47	0.14	0.13	0.79	0.10	0.06	0.24	0.48	0.21	0.10	0.13	0.03	0.66	0.04	0.23	0.03	0.04	0.02	0.01	0.17
4408921	84	1	55	172	19	20	140	60	0	1	0	0	0	0	0	0	1	0	0	0	0	0	0	0	0	9.74	1.38	0.23	0.06	0.48	0.26	0.22	0.05	0.05	0.05	0.05	0.09	0.03	0.03	0.04	0.03	0.55	0.04	0.33	0.03	0.06	0.04	0.03	0.05
4434430	52	1	70	173	23	15	173	70	1	0	0	0	0	0	0	0	0	0	0	0	0	0	1	0	0	24.81	0.70	0.58	0.39	0.75	0.28	0.20	0.55	0.19	0.18	0.33	0.42	0.16	0.18	0.21	0.05	0.48	0.03	0.67	0.08	0.08	0.07	0.03	0.21
4445356	72	1	85	172	29	5	158	68	1	0	心功能Ⅳ级	0	0	0	0	0	1	1	0	0	0	0	1	1	1	9.21	0.55	0.48	0.05	1.07	0.24	0.13	0.18	0.07	0.04	0.09	0.08	0.05	0.04	0.05	0.03	0.57	0.06	0.33	0.04	0.04	0.03	0.02	0.08
4411039	83	1	65	176	21	20	130	80	1	0	心功能IV	0	0	0	0	0	1	0	0	0	0	0	1	1	0	185.60	5.75	4.15	2.39	1.43	1.01	0.69	2.01	0.36	1.44	1.80	1.64	0.49	0.38	0.21	0.52	4.39	0.16	1.74	0.15	0.14	0.08	0.06	1.12
4440610	66	1	55	155	23	4	184	86	1	1	心功能不全	1	0	0	0	0	0	0	0	0	0	0	1	1	0	28.46	1.46	1.03	0.22	0.65	0.44	0.20	0.20	0.13	0.07	0.13	0.16	0.09	0.12	0.06	0.04	1.13	0.05	0.52	0.06	0.07	0.06	0.03	0.07
4454350	81	1	77	163	29	10	152	56	0	0	0	0	0	0	0	0	1	0	0	0	0	0	1	1	0	22.38	0.64	0.23	0.08	0.61	0.09	0.16	0.22	0.00	0.11	0.10	0.12	0.06	0.10	0.07	0.03	1.16	0.05	0.39	0.04	0.06	0.03	0.02	0.14
4387613	55	1	75	174	25	20	150	70	0	0	0	0	0	1	0	0	1	0	0	0	0	0	1	1	1	6.73	0.38	0.21	0.07	0.52	0.19	0.26	0.28	0.05	0.16	0.17	0.57	0.17	0.10	0.05	0.03	0.90	0.09	0.38	0.06	0.05	0.05	0.03	0.12
4412054	68	1	56	155	23	10	170	93	1	0	心功能3级	0	0	0	0	0	0	1	0	0	0	0	0	1	1	11.02	0.63	0.26	0.06	0.38	0.19	0.16	0.29	0.08	0.05	0.11	0.21	0.10	0.06	0.08	0.05	0.45	0.05	0.16	0.03	0.07	0.04	0.03	0.15
4415852	76	1	63	170	22	10	210	90	1	0	0	0	0	0	0	0	1	1	0	0	0	0	1	1	1	16.48	0.44	0.15	0.19	0.73	0.12	0.12	0.59	0.08	0.07	0.28	0.56	0.18	0.11	0.08	0.06	1.00	0.09	0.64	0.06	0.08	0.06	0.04	0.35
4416325	60	1	46	156	19	20	160	90	0	0	0	0	0	0	0	0	1	0	0	0	0	0	1	0	0	10.23	0.39	0.20	0.07	0.60	0.09	0.14	0.17	0.08	0.05	0.08	0.10	0.05	0.07	0.06	0.04	0.49	0.05	0.27	0.03	0.07	0.04	0.03	0.11
4440594	55	1	75	175	24	10	124	70	0	0	0	0	0	0	0	0	1	0	0	0	0	0	0	0	0	25.20	1.86	0.92	0.27	1.32	0.28	0.35	0.16	0.36	0.11	0.12	0.21	0.13	0.17	0.06	0.03	0.64	0.05	0.42	0.07	0.07	0.05	0.04	0.12
4405130	76	1	78	180	24	10	136	73	1	1	0	1	0	0	0	0	0	1	0	0	1	0	0	0	1	28.55	2.21	0.38	0.21	0.80	0.20	0.29	0.26	0.07	0.09	0.14	0.28	0.09	0.10	0.08	0.06	1.47	0.09	0.69	0.07	0.11	0.05	0.03	0.25
4446725	75	1	75	165	28	10	130	80	1	1	心功能Ⅳ级	0	0	0	0	0	1	0	0	0	1	0	1	1	1	36.37	3.36	0.26	0.32	1.10	0.22	0.36	0.27	0.14	0.11	0.18	0.30	0.18	0.17	0.13	0.08	1.49	0.08	1.14	0.09	0.09	0.11	0.10	0.50
4449500	48	1	70	167	25	9	173	139	0	1	0	0	0	0	0	0	1	0	0	0	0	0	0	0	0	21.66	1.81	0.59	0.17	2.68	0.29	0.33	0.21	0.09	0.22	0.21	0.41	0.20	0.14	0.15	0.04	1.78	0.08	0.99	0.06	0.09	0.07	0.03	0.27
4462795	61	1	70	170	24	8	147	77	0	1	0	0	0	0	0	0	1	0	0	0	0	0	1	0	0	23.54	2.36	0.38	0.13	0.55	0.21	0.23	0.25	0.09	0.12	0.16	0.14	0.12	0.13	0.12	0.06	1.17	0.05	0.68	0.08	0.09	0.04	0.03	0.26
4408538	66	1	70	166	25	8	153	101	1	1	心功能III级	0	0	0	0	0	1	0	0	0	0	0	0	1	0	18.10	1.79	0.27	0.14	0.59	0.15	0.29	0.18	0.07	0.10	0.12	0.10	0.06	0.06	0.06	0.10	1.31	0.07	0.44	0.04	0.09	0.06	0.05	0.10
4461126	59	1	70	174	23	20	120	67	0	0	0	0	0	0	0	0	1	1	0	0	0	0	1	1	0	6.09	0.47	0.12	0.03	0.40	0.09	0.08	0.10	0.04	0.04	0.06	0.06	0.04	0.06	0.04	0.06	0.50	0.04	0.26	0.03	0.04	0.03	0.02	0.05
4451746	69	1	60	168	21	20	143	84	1	0	心功能Ⅲ级	0	0	0	0	0	1	0	0	0	0	0	0	0	0	12.98	1.04	0.21	0.12	0.68	0.12	0.43	0.09	0.07	0.07	0.12	0.24	0.14	0.10	0.04	0.02	0.90	0.03	0.50	0.05	0.08	0.07	0.04	0.25
4448406	82	1	70	170	24	10	137	61	0	1	0	0	0	0	0	0	1	1	0	0	0	0	1	0	1	6.91	0.73	0.29	0.08	0.50	0.16	0.37	0.16	0.06	0.07	0.14	0.27	0.11	0.09	0.13	0.04	0.91	0.05	0.37	0.03	0.08	0.07	0.03	0.24
4387515	42	1	55	168	19	3	175	87	0	0	0	0	0	0	0	0	1	0	0	0	0	0	0	0	0	12.50	0.94	0.17	0.39	0.99	0.31	0.50	0.10	0.09	0.10	0.06	0.14	0.09	0.23	0.11	0.03	1.20	0.07	1.00	0.05	0.10	0.11	0.02	0.11
4408801	73	1	65	160	25	2	133	85	0	0	0	0	0	0	0	0	0	0	0	0	0	1	0	0	0	19.75	1.99	0.35	0.32	0.49	0.28	0.40	0.12	0.11	0.09	0.09	0.09	0.05	0.06	0.03	0.07	0.95	0.06	0.57	0.13	0.11	0.08	0.06	0.17
4442430	85	1	50	168	18	1	185	94	0	1	0	0	1	0	0	0	1	0	0	0	0	0	0	0	0	30.98	1.46	0.52	0.64	0.55	0.17	0.30	0.16	0.14	0.14	0.15	0.16	0.08	0.13	0.10	0.04	0.78	0.11	0.56	0.07	0.06	0.07	0.02	0.23
4433586	79	1	52	157	21	5	89	66	0	0	0	0	0	0	0	0	1	0	0	0	0	0	1	0	0	10.78	0.83	0.11	0.14	0.50	0.09	0.18	0.12	0.07	0.04	0.06	0.11	0.07	0.08	0.06	0.04	0.80	0.06	0.39	0.03	0.06	0.05	0.02	0.14
4443127	71	1	60	156	25	17	130	80	1	0	1	0	1	0	0	0	1	1	0	0	1	0	1	1	1	12.15	0.78	0.22	0.24	0.49	0.13	0.21	0.06	0.00	0.03	0.06	0.05	0.05	0.08	0.08	0.07	0.78	0.05	0.33	0.08	0.04	0.04	0.02	0.10
4442294	63	1	102	182	31	2	146	80	1	0	1	0	0	0	0	0	0	1	0	0	1	1	0	1	1	26.65	1.25	0.42	0.18	0.77	0.43	0.29	0.10	0.10	0.11	0.13	0.18	0.10	0.13	0.06	0.05	1.16	0.07	0.64	0.06	0.08	0.08	0.06	0.22
4458815	66	1	70	170	24	2	142	92	1	0	0	0	0	0	0	0	0	0	0	0	0	0	0	0	0	4.70	0.45	0.11	0.05	0.47	0.09	0.22	0.02	0.07	0.03	0.03	0.06	0.06	0.03	0.05	0.03	0.60	0.03	0.31	0.04	0.05	0.04	0.02	0.07
4425756	60	1	80	170	28	4	114	79	0	0	0	0	0	0	0	0	1	0	0	0	0	0	1	0	0	15.87	1.41	0.26	0.13	0.66	0.28	0.29	0.28	0.13	0.07	0.20	0.22	0.07	0.07	0.08	0.05	1.09	0.06	0.44	0.07	0.07	0.06	0.02	0.17
4423649	56	1	75	175	24	3	151	104	0	1	0	0	1	0	0	0	0	0	0	0	0	0	1	0	0	10.63	2.21	0.29	0.13	0.74	0.21	0.29	0.13	0.08	0.03	0.07	0.10	0.07	0.05	0.06	0.05	0.89	0.05	0.40	0.08	0.07	0.09	0.04	0.14
4444349	69	1	84	171	29	33	142	78	1	0	0	1	0	0	0	0	1	0	0	0	0	0	1	0	0	9.99	1.65	0.30	0.09	0.51	0.15	0.28	0.07	0.12	0.07	0.25	0.30	0.06	0.11	0.05	0.03	0.80	0.04	0.39	0.03	0.05	0.03	0.02	0.11
4446132	68	1	60	158	24	19	126	78	1	0	心功能Ⅳ级	0	0	0	0	0	1	1	0	0	0	0	0	1	0	42.04	1.98	0.23	0.21	0.69	0.09	0.19	0.11	0.09	0.07	0.13	0.19	0.09	0.13	0.08	0.05	1.54	0.05	0.88	0.09	0.14	0.13	0.05	0.23
4421355	73	1	65	165	24	18	144	82	1	0	心功能4级	0	0	0	0	0	1	1	0	0	1	1	0	1	1	23.63	1.78	0.34	0.17	0.64	0.13	0.19	0.11	0.05	0.09	0.08	0.11	0.06	0.05	0.06	0.04	1.02	0.07	0.54	0.05	0.05	0.05	0.03	0.25
4441287	61	1	70	162	27	14	180	90	1	0	心功能Ⅲ级	1	0	0	0	0	1	1	0	0	1	0	1	1	1	14.26	1.29	0.12	0.10	0.83	0.12	0.18	0.00	0.10	0.03	0.05	0.04	0.05	0.10	0.04	0.03	0.61	0.06	0.54	0.08	0.13	0.07	0.04	0.04
4440281	58	1	65	170	22	1	188	110	0	1	0	0	0	0	0	0	1	0	0	0	0	0	0	0	0	28.74	1.55	0.60	0.34	0.94	0.25	0.51	0.11	0.13	0.08	0.08	0.10	0.06	0.09	0.09	0.04	1.64	0.05	0.70	0.08	0.06	0.07	0.04	0.14
4442097	73	1	80	172	27	15	130	70	1	0	心功能Ⅳ级	0	0	0	0	0	1	1	0	0	1	0	1	1	0	12.40	1.40	0.25	0.05	0.86	0.22	0.29	0.08	0.06	0.06	0.08	0.12	0.06	0.07	0.07	0.05	0.63	0.04	0.26	0.03	0.06	0.04	0.05	0.10
4431018	71	1	65	175	21	20	104	70	1	1	心功能Ⅲ级	0	0	0	0	0	1	0	0	0	0	0	0	1	1	19.22	1.87	0.28	0.18	1.13	0.19	0.30	0.21	0.09	0.14	0.23	0.39	0.10	0.07	0.10	0.09	1.57	0.10	0.96	0.06	0.11	0.08	0.03	0.23
4457748	59	1	70	170	24	7	138	78	1	0	心功能III级	1	0	1	0	0	1	1	0	0	1	0	0	0	1	5.99	0.54	0.11	0.04	0.62	0.08	0.30	0.04	0.07	0.03	0.05	0.06	0.06	0.10	0.03	0.03	1.16	0.05	0.44	0.04	0.03	0.02	0.02	0.08
4434553	58	1	69	160	27	10	140	73	0	0	0	0	0	0	0	0	1	0	0	0	0	0	0	0	0	16.25	1.98	0.42	0.09	0.87	0.21	0.19	0.10	0.10	0.06	0.12	0.14	0.11	0.06	0.06	0.03	0.85	0.07	0.54	0.07	0.07	0.05	0.03	0.08
4429660	80	1	75	175	24	10	170	100	1	0	1	0	0	0	0	0	1	0	0	0	0	1	1	1	1	13.62	1.65	0.22	0.11	0.86	0.14	0.23	0.09	0.09	0.05	0.08	0.07	0.04	0.09	0.04	0.08	1.96	0.14	0.96	0.21	0.12	0.04	0.04	0.16
4451445	47	1	70	170	24	0	139	86	0	1	0	0	0	0	0	0	0	1	0	0	0	0	0	0	0	11.04	1.53	0.27	0.20	0.40	0.19	0.28	0.04	0.00	0.05	0.06	0.09	0.07	0.04	0.03	0.02	0.80	0.04	0.48	0.05	0.07	0.04	0.02	0.12
4442646	71	1	70	170	24	0	154	104	0	0	0	0	0	0	0	0	0	0	0	0	0	0	0	0	0	27.17	8.23	0.40	0.17	0.68	0.13	0.24	0.10	0.29	0.09	0.14	0.18	0.09	0.14	0.11	0.04	0.98	0.03	0.41	0.06	0.07	0.08	0.06	0.25
4448754	36	1	83	170	29	1	107	68	0	0	0	0	0	0	0	1	0	0	0	0	0	0	0	0	0	8.07	1.88	0.39	0.17	1.20	0.14	0.66	0.09	0.10	0.07	0.20	0.31	0.08	0.06	0.06	0.01	1.10	0.04	0.42	0.04	0.08	0.07	0.03	0.18
4415167	84	1	55	162	21	15	146	50	1	0	心功能4级	0	0	0	0	0	1	1	0	0	0	1	0	1	0	44.48	4.36	1.50	0.30	0.89	0.44	0.24	0.20	0.11	0.15	0.12	0.12	0.08	0.08	0.11	0.06	1.30	0.09	0.88	0.07	0.09	0.07	0.05	0.15
4446714	63	1	82	173	27	1	119	90	0	0	0	0	0	1	0	0	0	0	0	0	0	0	0	0	1	11.06	1.17	0.23	0.05	0.72	0.12	0.12	0.10	0.05	0.07	0.12	0.17	0.07	0.07	0.06	0.03	0.55	0.04	0.31	0.05	0.06	0.04	0.03	0.17
4416897	68	1	75	175	24	10	130	80	1	0	1	0	0	0	0	0	1	1	0	0	1	0	0	1	1	32.51	2.00	0.34	0.26	0.74	0.21	0.31	0.25	0.10	0.11	0.18	0.25	0.13	0.11	0.10	0.07	1.56	0.08	0.78	0.04	0.09	0.06	0.04	0.29
4415576	82	1	60	154	25		190	90	0	1	0	0	1	0	0	0	0	0	0	0	0	1	1	1	0	17.73	1.76	0.20	0.13	1.34	0.18	0.35	0.17	0.08	0.04	0.07	0.08	0.03	0.07	0.07	0.12	1.10	0.10	0.63	0.24	0.11	0.05	0.04	0.10
4384625	46	1	78	170	27	5	117	80	0	0	0	0	0	0	0	0	0	0	0	0	1	0	0	0	0	7.48	1.03	0.24	0.09	0.82	0.17	0.27	0.05	0.06	0.11	0.06	0.14	0.17	0.20	0.06	0.03	1.27	0.09	0.69	0.07	0.14	0.11	0.04	0.09
4425369	26	1	94	180	29	3	120	80	0	0	0	0	1	0	0	0	1	1	0	0	0	1	0	0	0	15.08	1.81	0.32	0.10	0.65	0.26	0.31	0.12	0.09	0.07	0.12	0.22	0.10	0.06	0.07	0.08	1.08	0.07	0.50	0.05	0.08	0.06	0.05	0.17
4421822	79	1	60	150	27	10	170	100	0	1	0	0	0	1	0	0	0	1	0	0	0	0	0	1	0	28.15	0.92	0.19	0.33	0.92	0.19	0.38	0.14	0.12	0.07	0.07	0.12	0.06	0.05	0.07	0.06	1.19	0.06	0.44	0.04	0.10	0.05	0.04	0.14
4437758	45	1	85	173	28	10	143	91	0	0	0	0	0	0	0	0	1	1	0	0	1	1	0	1	0	13.29	0.89	0.14	0.15	1.01	0.12	0.21	0.08	0.07	0.04	0.06	0.09	0.04	0.05	0.04	0.04	0.83	0.06	0.54	0.08	0.11	0.08	0.04	0.09
4428287	48	1	80	170	28	4	162	119	1	0	0	0	1	0	0	0	0	1	0	0	0	0	1	0	0	12.57	1.36	0.16	0.07	1.17	0.11	0.26	0.08	0.08	0.06	0.12	0.15	0.05	0.04	0.03	0.03	0.63	0.05	0.36	0.05	0.06	0.04	0.03	0.12
4429512	52	1	90	184	27	10	164	94	0	0	0	0	0	0	0	0	1	0	0	0	0	0	0	0	0	15.45	2.54	0.31	0.09	0.83	0.16	0.35	0.06	0.15	0.05	0.07	0.11	0.05	0.06	0.06	0.04	1.39	0.10	0.97	0.05	0.06	0.05	0.03	0.13
4460721	81	1	75	175	24	5	161	78	1	1	0	0	0	0	0	1	0	0	0	0	0	0	1	0	0	9.86	1.83	0.28	0.10	0.35	0.24	0.44	0.09	0.11	0.07	0.10	0.10	0.09	0.11	0.05	0.02	1.20	0.05	0.46	0.03	0.05	0.03	0.04	0.19
4437955	31	1	80	168	28	0	145	88	0	0	0	0	0	0	0	0	0	0	0	0	0	0	0	0	0	16.50	3.55	0.29	0.10	0.42	0.23	0.27	0.07	0.09	0.07	0.06	0.10	0.06	0.13	0.08	0.03	2.77	0.11	1.00	0.06	0.08	0.05	0.06	0.09
4432160	75	1	80	175	26	3	140	85	1	0	心功能III级	0	1	0	0	0	0	1	0	0	0	1	0	1	1	16.93	1.38	0.54	0.09	1.40	0.14	0.28	0.11	0.06	0.14	0.38	0.37	0.10	0.09	0.07	0.04	1.26	0.07	0.67	0.06	0.08	0.09	0.03	0.22
4456131	47	1	80	175	26	4	151	105	0	0	0	0	0	0	0	0	0	0	0	0	0	0	0	0	0	7.05	1.30	0.14	0.17	0.34	0.36	0.75	0.03	0.08	0.02	0.04	0.06	0.03	0.05	0.05	0.02	1.05	0.07	0.59	0.03	0.03	0.03	0.03	0.14
4433115	67	1	70	170	24	0	150	78	0	1	0	0	0	0	0	0	0	1	0	0	0	0	0	0	0	7.86	1.00	0.12	0.07	0.60	0.12	0.36	0.09	0.06	0.05	0.07	0.13	0.08	0.09	0.06	0.03	0.78	0.04	0.38	0.04	0.06	0.04	0.04	0.11
4416296	69	1	60	160	23	8	150	75	1	0	0	0	0	0	0	0	0	0	0	0	0	0	0	0	0	10.91	0.74	0.13	0.10	0.63	0.10	0.15	0.10	0.05	0.04	0.06	0.10	0.03	0.03	0.05	0.07	0.83	0.05	0.37	0.03	0.11	0.04	0.04	0.09
4421901	83	1	60	160	23	20	76	63	0	1	0	0	0	0	0	0	1	0	0	0	0	0	0	0	0	9.04	0.55	0.09	0.10	0.48	0.04	0.08	0.05	0.03	0.04	0.09	0.13	0.04	0.04	0.05	0.03	0.70	0.02	0.37	0.04	0.10	0.03	0.03	0.08
4459480	69	1	70	175	23	3	155	80	1	1	心功能III级	0	0	1	0	0	1	0	0	0	0	1	1	0	0	8.37	0.96	0.13	0.08	0.55	0.10	0.27	0.04	0.00	0.03	0.04	0.07	0.05	0.07	0.05	0.04	1.56	0.06	0.53	0.05	0.05	0.04	0.02	0.07
4410420	86	1	61	155	25	4	135	71	1	1	心功能III级	0	0	1	0	0	0	1	0	0	1	0	0	0	1	18.31	2.46	0.19	0.12	0.82	0.06	0.11	0.17	0.03	0.08	0.12	0.12	0.06	0.09	0.04	0.04	1.12	0.09	0.48	0.03	0.18	0.07	0.04	0.13
4431834	65	1	75	174	25	2	140	100	1	1	心功能Ⅲ级	0	0	0	0	0	0	1	0	0	0	0	0	1	0	12.77	1.67	0.19	0.09	1.16	0.06	0.23	0.09	0.05	0.07	0.12	0.19	0.06	0.07	0.06	0.06	1.77	0.06	0.73	0.06	0.08	0.05	0.05	0.14
4427111	57	1	82	170	28	0	139	104	1	0	心功能4级	0	0	0	0	0	1	1	0	0	1	0	0	1	1	24.97	2.09	0.31	0.26	0.73	0.27	0.37	0.08	0.08	0.09	0.27	0.44	0.13	0.09	0.07	0.03	1.59	0.09	0.76	0.05	0.05	0.06	0.06	0.38
4412878	62	1	70	180	22	10	158	92	0	1	0	0	0	0	0	0	0	0	0	0	0	0	0	0	0	16.70	1.78	0.19	0.09	1.66	0.10	0.28	0.11	0.08	0.05	0.10	0.12	0.04	0.07	0.04	0.05	0.84	0.06	0.48	0.04	0.12	0.06	0.03	0.07
4444997	72	1	65	175	21	0	140	70	0	1	0	0	0	0	0	0	1	0	0	0	0	0	0	0	0	11.69	0.80	0.18	0.08	0.52	0.23	0.33	0.08	0.00	0.06	0.16	0.27	0.10	0.06	0.04	0.04	0.93	0.04	0.40	0.02	0.09	0.05	0.02	0.19
4308974	21	1	74	170	26	2	134	96	0	0	0	1	1	0	0	0	1	0	0	0	0	0	0	0	0	15.58	0.82	0.34	0.74	0.52	0.19	0.30	0.05	0.06	0.05	0.08	0.08	0.07	0.06	0.10	0.03	1.69	0.06	0.31	0.04	0.08	0.08	0.03	0.14
4416101	53	1	65	165	24		138	100	1	0	0	0	1	0	0	0	0	0	0	0	0	0	0	0	0	17.17	1.55	0.30	0.10	0.74	0.12	0.17	0.09	0.07	0.03	0.07	0.08	0.05	0.07	0.04	0.06	1.07	0.08	0.73	0.04	0.08	0.05	0.04	0.09
4458117	87	1	62	162	24	10	140	60	1	1	0	0	0	0	0	0	0	0	0	0	0	1	1	0	0	9.21	0.87	0.29	0.08	0.78	0.14	0.22	0.04	0.00	0.05	0.11	0.08	0.06	0.07	0.05	0.04	0.51	0.03	0.30	0.04	0.06	0.05	0.02	0.08
4428441	67	1	65	160	25	10	144	74	1	0	0	1	0	1	0	0	1	0	0	0	1	0	0	1	1	22.91	2.73	0.46	0.19	0.62	0.34	0.22	0.08	0.06	0.06	0.09	0.10	0.06	0.08	0.07	0.09	2.62	0.11	1.04	0.07	0.09	0.06	0.07	0.16
4430430	56	1	70	167	25	2	165	110	1	0	0	0	0	0	0	0	0	1	0	0	1	0	0	0	1	16.78	5.88	0.21	0.08	1.17	0.19	0.37	0.18	0.10	0.06	0.06	0.13	0.12	0.14	0.11	0.12	3.07	0.14	1.64	0.22	0.31	0.24	0.04	0.17
4447671	79	1	70	167	25	0	152	80	0	0	0	0	0	0	0	0	1	0	0	0	0	0	0	0	0	17.80	3.23	0.24	0.14	1.20	0.17	0.37	0.09	0.11	0.05	0.06	0.07	0.06	0.05	0.08	0.05	1.01	0.06	0.50	0.07	0.08	0.08	0.05	0.09
4431384	52	1	82	175	27	0	131	74	0	0	0	0	0	0	0	0	0	0	0	0	0	0	0	0	0	12.93	1.91	0.24	0.07	0.68	0.17	0.30	0.11	0.08	0.08	0.18	0.32	0.07	0.06	0.05	0.03	0.98	0.05	0.42	0.06	0.07	0.08	0.03	0.21
4436813	69	1	75	172	25	8	135	86	0	0	0	0	0	0	0	0	1	0	0	0	0	1	1	0	0	11.32	1.44	0.17	0.06	1.11	0.08	0.21	0.10	0.06	0.07	0.14	0.21	0.06	0.04	0.05	0.00	0.84	0.05	0.47	0.03	0.05	0.04	0.03	0.12
4410042	77	1	70	170	24	10	154	80	0	1	0	0	0	0	0	0	1	1	0	0	0	0	1	0	1	12.51	1.47	0.21	0.12	0.67	0.17	0.32	0.07	0.08	0.05	0.11	0.13	0.07	0.06	0.07	0.02	0.80	0.06	0.43	0.06	0.06	0.05	0.04	0.14
4422917	64	1	75	165	28	12	156	112	1	0	0	1	0	0	0	0	1	1	0	0	0	1	1	1	1	15.08	2.31	0.27	0.14	0.94	0.17	0.44	0.09	0.04	0.03	0.07	0.09	0.05	0.06	0.05	0.05	1.09	0.05	0.62	0.04	0.06	0.06	0.05	0.05
4447107	67	1	73	174	24	10	148	103	0	1	0	0	0	0	0	0	0	0	0	0	0	0	0	0	0	12.88	1.48	0.16	0.08	0.56	0.09	0.34	0.11	0.06	0.05	0.09	0.19	0.09	0.10	0.05	0.05	1.08	0.07	0.88	0.06	0.07	0.07	0.04	0.16
4414407	50	1	75	176	24	0	111	83	0	0	0	0	0	0	0	0	0	0	0	0	0	0	0	0	0	11.94	1.08	0.17	0.07	0.70	0.14	0.16	0.12	0.06	0.05	0.06	0.11	0.06	0.06	0.07	0.03	0.70	0.05	0.64	0.04	0.11	0.09	0.03	0.15
4448176	73	1	70	170	24	6	143	107	1	0	1	0	0	0	0	0	0	0	0	0	0	0	0	0	0	15.34	1.38	0.12	0.08	0.52	0.10	0.19	0.10	0.06	0.04	0.05	0.11	0.04	0.06	0.06	0.03	0.91	0.06	0.43	0.04	0.07	0.04	0.04	0.10
4436236	67	1	80	183	24	19	164	78	1	1	0	0	0	0	0	0	0	0	0	0	0	0	0	0	0	15.65	1.62	0.20	0.11	0.65	0.12	0.34	0.04	0.10	0.03	0.05	0.05	0.06	0.04	0.04	0.02	0.86	0.03	0.47	0.07	0.08	0.08	0.04	0.10
4425013	59	1	72	168	26	6	180	104	0	0	0	0	0	0	0	0	0	0	0	0	0	0	0	0	0	10.38	1.50	0.18	0.10	0.98	0.14	0.34	0.05	0.06	0.04	0.04	0.07	0.03	0.05	0.04	0.03	0.81	0.04	0.41	0.07	0.06	0.05	0.04	0.07
4409498	67	1	46	157	19		144	78	0	1	0	0	1	0	0	0	0	0	0	0	0	0	1	0	0	15.72	1.46	0.24	0.16	0.76	0.15	0.39	0.13	0.05	0.09	0.14	0.21	0.05	0.05	0.03	0.05	0.77	0.04	0.43	0.04	0.17	0.07	0.05	0.16
4409766	26	1	84	175	27	0	137	97	0	0	0	1	1	0	0	0	1	0	0	0	0	0	0	0	0	7.20	1.54	0.14	0.09	0.98	0.10	0.27	0.08	0.05	0.03	0.04	0.04	0.03	0.04	0.03	0.03	0.64	0.03	0.21	0.02	0.06	0.05	0.03	0.04
4460157	72	1	50	162	19	8	133	74	1	0	0	0	0	0	0	0	0	1	0	0	0	0	0	0	1	8.15	1.24	0.18	0.05	0.30	0.06	0.17	0.03	0.07	0.06	0.03	0.04	0.04	0.05	0.02	0.02	0.66	0.04	0.31	0.03	0.04	0.03	0.02	0.15
4406928	70	1	55	165	20	0	121	81	1	1	0	1	0	0	0	0	0	0	0	0	0	0	0	0	0	8.43	1.11	0.31	0.03	0.21	0.13	0.13	0.12	0.04	0.05	0.06	0.07	0.04	0.03	0.02	0.04	0.43	0.04	0.21	0.03	0.07	0.03	0.02	0.06
4442598	74	1	90	178	28	0	143	87	1	0	0	0	0	0	0	0	0	1	0	0	1	0	0	0	1	12.73	1.22	0.47	0.09	0.88	0.17	0.34	0.07	0.10	0.09	0.11	0.15	0.06	0.10	0.10	0.03	0.84	0.07	0.51	0.05	0.07	0.05	0.03	0.20
4408013	64	1	70	178	22	20	138	94	0	0	1	0	0	1	0	0	1	0	0	0	0	0	0	1	0	28.99	1.72	0.32	0.25	0.95	0.33	0.46	0.22	0.05	0.08	0.10	0.14	0.06	0.15	0.09	0.06	1.67	0.11	1.12	0.06	0.16	0.06	0.05	0.13
4426348	72	1	75	160	29	10	160	90	1	0	心功能Ⅳ级	1	0	0	0	0	1	1	0	0	0	1	1	1	1	22.02	1.20	0.25	0.21	0.52	0.15	0.27	0.11	0.09	0.07	0.11	0.17	0.09	0.10	0.08	0.04	1.44	0.05	0.68	0.05	0.07	0.07	0.05	0.16
4462323	55	1	81	172	27	0	150	100	1	0	0	0	0	0	0	0	0	1	0	0	0	0	1	0	0	14.44	3.04	0.26	0.13	0.52	0.33	0.33	0.06	0.08	0.06	0.09	0.08	0.06	0.06	0.12	0.02	1.02	0.07	0.45	0.06	0.07	0.05	0.04	0.17
4439087	58	1	80	180	25	0	133	88	0	1	0	0	0	0	0	0	0	1	0	0	0	0	0	0	0	22.54	2.18	0.27	0.15	0.95	0.22	0.33	0.10	0.09	0.10	0.08	0.07	0.04	0.07	0.03	0.04	0.86	0.03	0.52	0.05	0.11	0.04	0.03	0.10
4408870	46	1	69	158	28	0	120	80	0	0	0	0	0	0	0	0	0	0	0	0	0	0	0	0	0	12.96	0.85	0.13	0.08	0.86	0.06	0.18	0.10	0.05	0.05	0.07	0.06	0.04	0.05	0.04	0.06	0.85	0.05	0.15	0.03	0.08	0.06	0.04	0.07
4425415	64	1	90	180	28	5	154	100	1	1	心功能Ⅳ级	0	0	1	0	0	0	1	0	0	0	1	1	0	1	16.37	2.04	0.31	0.08	1.05	0.27	0.44	0.10	0.10	0.06	0.08	0.11	0.05	0.09	0.05	0.09	1.55	0.07	0.73	0.13	0.10	0.06	0.06	0.06
4435604	36	1	80	180	25	1	129	84	0	0	0	0	0	0	0	0	0	0	0	0	0	0	0	0	0	6.65	1.56	0.20	0.08	0.29	0.15	0.20	0.05	0.04	0.02	0.03	0.04	0.04	0.05	0.06	0.05	0.69	0.05	0.39	0.05	0.08	0.04	0.04	0.09
4412665	65	1	75	165	28	10	118	70	0	0	心功能4级	0	0	0	0	0	1	0	0	0	0	0	0	1	0	35.46	3.08	0.21	0.12	0.60	0.07	0.19	0.12	0.06	0.06	0.08	0.09	0.08	0.09	0.04	0.03	1.64	0.07	0.70	0.04	0.06	0.06	0.05	0.14
4425967	57	1	70	174	23	0	120	81	0	0	0	0	0	0	0	0	0	0	0	0	0	0	0	0	0	18.27	1.48	0.18	0.12	0.63	0.13	0.28	0.14	0.06	0.07	0.16	0.29	0.11	0.08	0.04	0.05	0.77	0.04	0.38	0.06	0.07	0.05	0.03	0.26
4447375	53	1	60	170	21	6	134	95	1	0	心功能Ⅲ级	0	0	0	0	0	0	0	0	0	0	0	0	0	0	9.44	1.20	0.17	0.07	1.11	0.30	0.37	0.09	0.12	0.05	0.07	0.05	0.05	0.06	0.05	0.06	0.49	0.03	0.34	0.06	0.12	0.06	0.03	0.07
4414611	63	1	100	175	33	1	140	80	1	1	心功能3级	0	0	0	0	0	1	1	0	0	0	0	1	0	0	21.37	2.69	0.37	0.19	1.14	0.24	0.48	0.15	0.09	0.09	0.18	0.22	0.08	0.07	0.05	0.05	1.00	0.07	0.75	0.07	0.08	0.08	0.06	0.16
4426562	58	1	80	168	28	5	183	102	0	0	0	0	0	0	0	0	0	0	0	0	0	0	0	0	0	20.47	2.13	0.82	0.21	0.75	0.40	0.33	0.11	0.07	0.08	0.11	0.15	0.07	0.06	0.05	0.03	1.29	0.05	0.51	0.10	0.07	0.04	0.03	0.15
4450521	59	1	60	160	23	5	153	100	1	0	0	0	0	0	0	0	0	0	0	0	0	0	0	0	0	35.15	1.32	0.50	0.78	0.70	0.24	0.30	0.15	0.07	0.10	0.16	0.18	0.10	0.15	0.15	0.09	2.20	0.10	0.79	0.08	0.09	0.02	0.02	0.16
4408020	70	1	60	172	20	10	156	83	0	1	0	0	0	0	0	0	1	0	0	0	0	0	1	0	0	22.47	2.54	0.29	0.18	1.03	0.24	0.41	0.14	0.08	0.14	0.25	0.33	0.09	0.13	0.06	0.09	1.76	0.12	1.55	0.13	0.16	0.11	0.09	0.14
4462652	76	1	70	162	27	3	120	80	0	0	0	0	0	0	0	0	0	0	0	0	0	0	0	0	0	16.33	1.30	0.19	0.26	0.42	0.13	0.22	0.09	0.06	0.05	0.09	0.13	0.11	0.07	0.09	0.03	0.86	0.04	0.52	0.03	0.06	0.05	0.03	0.28
4449213	61	1	78	170	27	0	157	109	0	0	0	0	0	0	0	0	0	0	0	0	0	0	0	0	0	11.32	0.80	0.08	0.11	0.37	0.08	0.21	0.06	0.10	0.03	0.07	0.12	0.06	0.08	0.06	0.04	1.24	0.07	0.50	0.05	0.08	0.05	0.04	0.15
4409801	60	1	70	174	23	2	159	97	0	1	0	0	0	0	0	0	0	1	0	0	0	0	0	0	0	22.89	2.06	0.38	0.14	0.97	0.31	0.50	0.13	0.05	0.07	0.09	0.11	0.06	0.08	0.04	0.04	1.37	0.06	0.68	0.04	0.09	0.06	0.04	0.10
4434077	43	1	100	175	33	13	192	123	0	1	0	0	1	0	0	0	1	0	0	0	0	0	0	0	0	11.80	1.80	0.41	0.20	0.61	0.20	0.55	0.03	0.09	0.03	0.06	0.08	0.04	0.05	0.05	0.03	1.40	0.06	0.82	0.05	0.09	0.07	0.05	0.04
4447662	66	1	78	171	27	13	178	86	1	0	0	0	1	0	0	0	1	1	0	0	1	0	1	0	0	13.88	2.07	0.18	0.16	0.77	0.16	0.29	0.06	0.07	0.05	0.05	0.10	0.06	0.06	0.06	0.04	1.20	0.07	0.66	0.05	0.03	0.05	0.02	0.11
4462195	64	1	80	170	28	20	128	82	0	1	0	0	0	0	0	0	1	0	0	0	0	0	0	0	0	13.14	1.29	0.12	0.16	0.26	0.12	0.31	0.02	0.04	0.03	0.03	0.03	0.06	0.06	0.05	0.02	1.26	0.05	0.69	0.03	0.03	0.03	0.02	0.08
4446973	52	1	76	174	25	7	126	85	0	0	0	0	0	0	0	0	1	0	0	0	0	0	0	0	0	12.51	1.74	0.19	0.15	0.52	0.11	0.22	0.10	0.07	0.04	0.04	0.06	0.05	0.08	0.06	0.04	0.93	0.07	0.60	0.11	0.07	0.06	0.03	0.07
4405099	84	1	55	165	20	10	155	80	1	1	1	0	0	0	0	0	1	0	0	0	0	0	0	0	0	15.78	1.32	0.20	0.24	0.49	0.09	0.18	0.18	0.05	0.10	0.11	0.16	0.07	0.09	0.11	0.10	1.29	0.13	0.49	0.06	0.18	0.07	0.04	0.14
4416814	68	1	60	160	23	5	147	82	0	0	0	0	0	1	0	0	0	0	0	0	0	1	0	0	0	23.71	2.57	0.31	0.13	0.98	0.15	0.30	0.09	0.11	0.04	0.06	0.08	0.04	0.05	0.05	0.09	1.23	0.10	0.77	0.05	0.15	0.06	0.07	0.08
4431916	63	1	70	170	24	2	136	86	0	1	0	0	1	0	0	0	1	1	0	0	0	0	1	0	0	8.00	1.33	0.20	0.23	0.64	0.19	0.46	0.03	0.05	0.06	0.03	0.06	0.05	0.08	0.07	0.03	1.15	0.06	0.43	0.04	0.04	0.03	0.03	0.08
4432691	57	1	90	175	29	2	142	84	0	0	0	0	0	0	0	0	0	0	0	0	0	0	0	0	0	20.31	2.07	0.45	0.13	1.24	0.34	0.30	0.08	0.06	0.07	0.09	0.13	0.07	0.08	0.04	0.03	1.49	0.11	0.93	0.08	0.08	0.06	0.03	0.10
4464520	69	1	80	168	28	3	130	78	1	0	心功能IV级	0	0	0	0	0	1	0	0	0	0	0	0	0	0	13.69	1.46	0.13	0.09	0.36	0.13	0.31	0.04	0.09	0.06	0.04	0.05	0.04	0.10	0.03	0.04	1.33	0.06	0.60	0.06	0.07	0.02	0.03	0.09
4408891	53	1	85	170	29	0	134	81	0	0	0	0	0	0	0	1	1	1	0	0	0	0	0	1	0	11.77	1.02	0.23	0.08	0.51	0.19	0.26	0.08	0.05	0.03	0.06	0.05	0.04	0.07	0.03	0.05	0.84	0.06	0.43	0.03	0.08	0.04	0.03	0.06
4450293	63	1	75	165	28	2	116	75	0	0	0	0	0	0	0	0	0	0	0	0	0	0	0	0	0	11.22	0.81	0.09	0.26	0.68	0.15	0.26	0.06	0.10	0.03	0.05	0.06	0.06	0.11	0.06	0.02	1.02	0.03	0.38	0.04	0.08	0.06	0.02	0.14
4421453	57	1	70	164	26	12	134	81	1	0	0	0	0	0	0	0	1	1	0	0	0	0	0	0	1	16.10	1.97	0.17	0.09	0.56	0.11	0.22	0.12	0.06	0.06	0.10	0.13	0.06	0.06	0.04	0.05	1.00	0.04	0.57	0.05	0.08	0.05	0.03	0.10
4450179	61	1	61	165	22	0	156	86	0	0	0	0	1	1	0	0	1	1	0	0	1	0	1	0	0	9.62	1.35	0.25	0.12	0.69	0.18	0.27	0.04	0.04	0.04	0.07	0.07	0.03	0.03	0.05	0.02	0.77	0.03	0.35	0.05	0.04	0.06	0.04	0.05
4458944	69	1	50	152	22	4	129	86	0	0	0	0	0	1	0	0	0	0	0	0	0	0	0	0	0	4.93	1.11	0.15	0.06	0.30	0.07	0.30	0.04	0.00	0.03	0.04	0.06	0.07	0.06	0.03	0.02	0.92	0.03	0.39	0.04	0.06	0.05	0.02	0.06
4457738	50	1	75	175	24	7	115	80	1	1	0	0	0	0	0	0	0	1	0	0	0	0	0	0	0	4.40	0.32	0.08	0.05	0.76	0.05	0.22	0.02	0.02	0.03	0.03	0.04	0.03	0.05	0.03	0.03	0.62	0.02	0.23	0.02	0.05	0.03	0.02	0.05
4452171	70	1	70	170	24	6	145	80	0	0	0	0	0	0	0	0	0	0	0	0	0	0	1	0	0	12.30	2.08	0.23	0.06	0.33	0.18	0.22	0.03	0.05	0.02	0.05	0.10	0.04	0.06	0.05	0.04	1.06	0.06	0.56	0.08	0.10	0.05	0.03	0.05
4433629	83	1	60	152	26	5	148	80	0	0	0	0	0	0	0	0	0	0	0	0	0	0	0	0	0	21.73	2.06	0.40	0.10	0.71	0.13	0.25	0.09	0.08	0.06	0.09	0.11	0.05	0.08	0.05	0.04	1.11	0.07	0.57	0.06	0.10	0.07	0.04	0.13
4442366	68	1	55	165	20	10	126	77	1	0	心功能Ⅳ级	0	0	0	0	0	1	1	0	0	1	0	1	0	1	12.51	1.00	0.21	0.06	0.64	0.14	0.25	0.07	0.07	0.05	0.05	0.09	0.05	0.05	0.05	0.05	0.52	0.05	0.32	0.04	0.07	0.07	0.04	0.08
4461934	78	1	63	169	22	5	125	73	1	0	0	0	0	1	0	0	0	0	0	0	0	0	0	0	0	7.73	1.06	0.17	0.06	0.47	0.12	0.24	0.09	0.17	0.07	0.07	0.08	0.04	0.08	0.06	0.03	0.67	0.04	0.39	0.04	0.05	0.03	0.02	0.11
4465556	47	1	75	161	29	0	134	104	0	0	0	0	0	0	0	0	0	0	0	0	0	0	0	0	0	18.35	7.71	0.14	0.21	0.30	0.18	0.15	0.04	0.04	0.08	0.07	0.06	0.08	0.13	0.08	0.04	2.09	0.09	0.96	0.07	0.07	0.07	0.08	0.13
4442854	57	1	63	165	23	0	105	74	0	0	0	0	0	0	0	0	0	0	0	0	0	0	0	0	0	11.93	3.27	0.22	0.11	0.71	0.11	0.19	0.03	0.12	0.06	0.09	0.08	0.06	0.11	0.10	0.02	0.65	0.04	0.39	0.04	0.05	0.04	0.03	0.12
4425504	71	1	85	157	34	10	220	130	1	1	0	0	0	0	0	0	1	0	0	0	0	1	1	0	0	14.63	1.32	0.29	0.09	1.24	0.18	0.31	0.13	0.07	0.08	0.07	0.08	0.05	0.06	0.03	0.06	0.55	0.06	0.45	0.25	0.11	0.06	0.06	0.13
4394796	43	1	60	160	23	0	111	78	0	0	0	0	0	0	0	0	1	1	0	0	0	0	0	0	0	18.60	1.63	0.34	0.48	0.88	0.24	0.36	0.08	0.06	0.06	0.05	0.11	0.08	0.09	0.05	0.06	1.39	0.10	0.64	0.04	0.07	0.09	0.03	0.18
4415615	77	1	55	155	23	30	145	60	1	1	心功能3级	0	0	0	0	0	1	0	0	0	0	0	1	0	0	20.00	1.95	0.30	0.18	1.90	0.20	0.23	0.17	0.08	0.06	0.08	0.14	0.07	0.09	0.07	0.09	1.51	0.08	0.90	0.06	0.14	0.07	0.04	0.15
4410351	67	1	64	150	28	7	135	90	1	0	心功能III级	0	0	0	0	0	1	1	0	0	1	0	0	0	1	10.53	0.97	0.20	0.08	0.69	0.11	0.11	0.07	0.04	0.04	0.04	0.04	0.03	0.03	0.03	0.05	0.55	0.04	0.42	0.03	0.08	0.08	0.05	0.07
4409849	60	1	85	160	33	3	181	103	0	0	0	0	0	0	0	0	0	0	0	0	0	0	1	0	0	12.62	1.01	0.33	0.14	0.29	0.12	0.19	0.12	0.03	0.05	0.05	0.06	0.04	0.06	0.03	0.03	1.29	0.05	0.52	0.04	0.07	0.04	0.05	0.07
4442313	50	1	70	166	25	1	171	100	0	1	0	0	0	0	0	0	1	0	0	0	0	0	1	0	0	19.22	1.50	0.17	0.10	0.76	0.17	0.28	0.06	0.08	0.07	0.07	0.09	0.05	0.07	0.09	0.05	1.10	0.09	0.93	0.08	0.11	0.10	0.06	0.14
4413927	67	1	60	150	27	19	146	74	0	0	0	1	0	0	0	0	1	0	0	0	0	0	0	0	0	11.46	0.81	0.21	0.08	0.25	0.09	0.13	0.04	0.05	0.03	0.05	0.07	0.04	0.04	0.03	0.03	0.57	0.06	0.38	0.04	0.06	0.05	0.04	0.06
4414110	61	1	55	163	21	3	140	82	1	1	0	0	0	0	0	0	0	0	0	0	1	0	0	0	0	12.64	2.93	0.32	0.12	1.09	0.27	0.16	0.07	0.07	0.04	0.03	0.04	0.03	0.04	0.03	0.04	0.92	0.05	0.36	0.03	0.07	0.04	0.03	0.05
4464692	63	1	58	160	23	0	115	69	0	0	0	0	0	0	0	0	0	0	0	0	0	0	0	0	0	5.18	0.65	0.07	0.04	0.45	0.05	0.18	0.05	0.02	0.02	0.08	0.08	0.03	0.04	0.03	0.02	0.37	0.02	0.22	0.02	0.02	0.03	0.01	0.05
4413449	53	1	80	174	26	2	144	103	1	0	0	0	1	0	0	0	0	1	0	0	0	0	1	0	0	10.35	1.25	0.21	0.11	0.56	0.34	0.20	0.08	0.07	0.07	0.10	0.17	0.07	0.05	0.05	0.02	0.68	0.03	0.46	0.05	0.10	0.06	0.03	0.15
4445323	57	1	80	176	26	10	170	110	1	0	0	0	0	0	0	0	1	1	0	0	0	0	0	0	0	17.80	1.43	0.20	0.11	0.54	0.13	0.20	0.07	0.07	0.05	0.06	0.07	0.05	0.05	0.04	0.04	0.61	0.07	0.54	0.08	0.07	0.08	0.04	0.11
4406056	71	1	55	158	22	13	175	95	0	1	0	0	0	0	0	0	1	0	0	0	0	1	0	0	0	23.53	4.46	0.32	0.40	1.35	0.18	0.40	0.20	0.08	0.08	0.10	0.24	0.08	0.11	0.06	0.08	1.73	0.15	0.76	0.06	0.14	0.07	0.05	0.14
4454573	57	1	70	170	24	0	149	80	0	1	0	0	0	0	0	0	0	1	0	0	0	0	0	0	0	9.92	1.37	0.17	0.07	0.95	0.20	0.33	0.04	0.00	0.03	0.05	0.13	0.06	0.08	0.05	0.03	1.49	0.05	0.63	0.06	0.05	0.03	0.03	0.11
4431088	69	1	65	160	25	0	130	85	0	0	0	0	0	0	0	0	1	0	0	0	0	0	0	0	0	12.02	1.15	0.25	0.06	0.78	0.32	0.20	0.16	0.07	0.09	0.19	0.21	0.07	0.07	0.05	0.03	1.07	0.05	0.61	0.05	0.09	0.05	0.04	0.21
4424386	69	1	90	160	35	1	179	101	0	0	0	0	1	0	0	0	1	0	0	0	0	1	1	1	1	9.73	1.21	0.16	0.09	0.46	0.17	0.24	0.05	0.06	0.03	0.05	0.06	0.04	0.07	0.03	0.04	0.94	0.08	0.47	0.05	0.06	0.06	0.02	0.05
4414939	52	1	80	160	31	0	185	123	1	0	1	0	0	0	0	0	0	1	0	0	1	1	1	0	0	23.55	1.84	0.47	0.24	0.83	0.19	0.21	0.22	0.09	0.46	0.98	1.32	0.22	0.13	0.08	0.06	1.28	0.06	0.60	0.05	0.08	0.08	0.04	0.37
4446512	61	1	53	156	22	0	131	67	0	0	0	0	0	0	0	0	0	0	0	0	0	0	0	0	0	12.27	0.91	0.09	0.11	0.62	0.17	0.28	0.03	0.09	0.02	0.04	0.05	0.06	0.10	0.06	0.03	0.77	0.06	0.47	0.06	0.07	0.04	0.02	0.09
4409095	56	1	60	167	22	3	129	57	0	0	0	0	0	0	0	0	1	0	0	0	0	0	0	0	0	31.01	1.25	0.39	0.22	0.60	0.16	0.33	0.10	0.10	0.06	0.10	0.20	0.05	0.06	0.05	0.05	1.69	0.08	0.85	0.05	0.10	0.05	0.04	0.13
4384013	18	1	100	185	29	0	130	87	0	0	0	0	0	0	0	0	1	0	0	0	0	0	0	0	0	9.83	0.29	0.21	0.47	0.35	0.18	0.30	0.12	0.07	0.07	0.09	0.19	0.15	0.10	0.06	0.03	1.10	0.06	0.42	0.06	0.11	0.04	0.01	0.12
4420028	87	1	60	160	23	7	111	52	0	0	0	1	1	0	0	0	1	0	0	0	0	0	1	1	0	27.52	2.91	0.17	0.12	0.51	0.15	0.16	0.08	0.05	0.10	0.10	0.15	0.06	0.10	0.06	0.05	1.44	0.05	0.48	0.04	0.05	0.02	0.02	0.13
4425153	52	1	70	164	26	3	126	95	0	1	0	0	0	0	0	0	0	1	0	0	0	0	0	0	0	8.38	1.58	0.20	0.08	0.64	0.14	0.25	0.05	0.05	0.04	0.04	0.04	0.05	0.05	0.03	0.04	0.75	0.04	0.29	0.05	0.06	0.04	0.04	0.04
4404380	82	1	50	150	22	20	140	73	0	1	0	1	0	1	0	0	0	0	0	0	0	0	0	0	0	24.67	1.59	0.26	0.09	2.07	0.09	0.20	0.07	0.07	0.07	0.08	0.11	0.04	0.06	0.03	0.07	0.88	0.05	0.43	0.03	0.13	0.04	0.03	0.14
4455888	67	1	79	168	28	3	160	100	1	0	心功能Ⅲ级	0	0	0	0	0	0	1	0	0	1	0	1	1	1	10.61	1.36	0.19	0.10	0.53	0.17	0.34	0.08	0.06	0.07	0.14	0.26	0.17	0.11	0.12	0.03	1.46	0.06	0.63	0.04	0.08	0.06	0.04	0.23
4438273	58	1	95	169	33	13	170	90	0	0	0	0	0	0	0	0	1	0	0	0	0	1	0	0	0	9.25	0.73	0.11	0.06	0.60	0.11	0.28	0.03	0.06	0.04	0.06	0.08	0.04	0.04	0.04	0.03	0.88	0.06	0.46	0.08	0.06	0.06	0.03	0.09
4434321	77	1	60	168	21	0	140	90	1	0	0	0	0	0	0	0	1	0	0	0	1	0	0	0	0	12.96	0.70	0.20	0.10	0.55	0.12	0.19	0.10	0.06	0.08	0.13	0.27	0.08	0.07	0.05	0.04	1.01	0.07	0.43	0.04	0.09	0.04	0.03	0.17
4436172	66	1	75	165	28	11	170	86	1	1	0	0	0	0	0	0	1	1	0	0	1	0	1	0	1	12.45	2.63	0.25	0.07	0.51	0.19	0.19	0.03	0.04	0.03	0.02	0.04	0.02	0.04	0.03	0.03	0.88	0.07	0.48	0.03	0.06	0.03	0.02	0.04
4444334	77	1	50	160	20	9	169	85	1	0	0	0	1	0	0	0	0	1	0	0	0	0	0	0	1	9.90	0.96	0.18	0.08	0.52	0.11	0.24	0.06	0.08	0.04	0.06	0.08	0.04	0.04	0.06	0.02	0.53	0.03	0.32	0.08	0.11	0.09	0.03	0.08
4446385	75	1	60	175	20	6	158	88	0	1	0	0	0	0	0	0	0	0	0	0	0	0	0	0	0	11.23	2.90	0.49	0.15	0.96	0.34	0.42	0.09	0.17	0.06	0.12	0.15	0.06	0.07	0.07	0.03	1.26	0.04	0.51	0.04	0.09	0.05	0.03	0.11
4414117	65	1	66	162	25	0	170	100	0	0	0	0	0	0	0	0	0	0	0	0	0	0	0	0	0	11.16	1.19	0.14	0.08	0.72	0.08	0.16	0.08	0.06	0.02	0.04	0.05	0.04	0.06	0.07	0.05	0.89	0.05	0.51	0.05	0.11	0.07	0.06	0.06
4449909	55	1	50	173	17	0	115	71	0	0	0	0	0	0	0	0	0	0	0	0	0	0	0	0	0	14.39	1.95	0.23	0.22	0.92	0.16	0.33	0.09	0.08	0.05	0.09	0.13	0.12	0.09	0.22	0.07	1.46	0.04	0.91	0.10	0.13	0.09	0.04	0.27
4441951	65	1	60	155	25	10	160	90	1	0	心功能Ⅲ级	0	0	0	0	0	1	1	0	0	1	0	0	0	1	14.84	1.58	0.25	0.14	0.76	0.19	0.37	0.00	0.14	0.10	0.21	0.18	0.05	0.08	0.06	0.05	1.01	0.05	0.52	0.05	0.08	0.04	0.03	0.14
4443885	53	1	85	176	27	10	140	90	0	0	0	0	0	0	0	0	1	0	0	0	0	0	0	0	0	15.60	3.35	0.23	0.13	1.03	0.33	0.58	0.03	0.15	0.05	0.10	0.11	0.05	0.10	0.09	0.03	1.41	0.07	0.61	0.06	0.07	0.05	0.06	0.10
4438272	83	1	48	165	17	10	95	60	0	1	0	1	0	1	0	0	0	0	0	0	0	0	0	0	0	43.81	8.85	0.43	0.37	0.67	0.21	0.42	0.19	0.15	0.08	0.12	0.19	0.07	0.15	0.10	0.04	2.09	0.15	1.35	0.11	0.12	0.07	0.05	0.21
4431260	60	1	63	162	24	7	140	80	1	0	0	0	1	0	0	0	0	1	0	0	0	0	0	0	1	20.26	2.48	0.31	0.14	1.05	0.26	0.25	0.09	0.11	0.13	0.34	0.51	0.11	0.14	0.07	0.04	0.98	0.09	0.33	0.06	0.08	0.05	0.03	0.28
4453184	82	1	70	175	23	5	140	70	0	1	0	0	1	1	0	0	1	1	0	0	0	0	1	0	0	13.14	2.22	0.37	0.18	0.76	0.24	0.46	0.08	0.08	0.07	0.09	0.15	0.07	0.08	0.08	0.02	1.23	0.07	0.51	0.04	0.03	0.04	0.02	0.12
4434626	62	1	55	159	22	0	135	92	0	0	0	0	0	0	0	0	0	0	0	0	0	0	0	0	0	15.05	2.54	0.31	0.12	0.55	0.13	0.21	0.13	0.08	0.06	0.20	0.32	0.12	0.08	0.05	0.02	0.83	0.07	0.41	0.03	0.08	0.06	0.05	0.17
4423725	37	1	62	170	21	2	100	60	0	0	0	0	1	0	0	0	0	0	0	0	0	0	0	0	0	14.05	0.97	0.14	0.19	1.02	0.21	0.33	0.12	0.05	0.10	0.25	0.43	0.10	0.05	0.06	0.04	1.09	0.10	0.63	0.04	0.08	0.07	0.03	0.20
4449593	73	1	58	160	22	0	120	70	0	0	0	0	0	0	0	0	0	0	0	0	0	0	0	0	0	12.35	2.34	0.23	0.09	0.45	0.14	0.38	0.07	0.07	0.04	0.10	0.21	0.08	0.14	0.07	0.04	1.75	0.06	0.79	0.07	0.08	0.07	0.05	0.17
4435678	71	1	65	158	26	15	184	74	0	0	0	0	0	0	0	0	1	1	0	0	1	1	1	0	0	13.73	1.54	0.23	0.11	1.10	0.17	0.31	0.05	0.08	0.05	0.04	0.06	0.02	0.05	0.05	0.04	1.11	0.06	0.55	0.04	0.06	0.04	0.03	0.05
4420475	64	1	75	170	26	0	138	84	0	1	0	0	1	0	0	0	0	0	0	0	0	1	0	0	0	13.57	1.13	0.14	0.07	1.03	0.08	0.13	0.14	0.04	0.04	0.07	0.09	0.05	0.05	0.06	0.07	1.21	0.07	0.52	0.04	0.08	0.05	0.05	0.09
4414380	56	1	75	156	31	0	145	90	0	1	0	1	1	0	0	0	1	1	0	0	0	1	0	0	0	17.43	1.84	0.24	0.36	0.90	0.16	0.37	0.06	0.06	0.05	0.04	0.05	0.05	0.06	0.05	0.04	1.10	0.05	0.54	0.03	0.09	0.06	0.04	0.10
4414647	43	1	70	167	25	9	140	90	0	0	0	0	1	0	0	0	1	1	0	0	1	0	0	0	1	28.06	2.20	0.33	0.14	0.54	0.28	0.17	0.11	0.06	0.07	0.06	0.07	0.04	0.05	0.04	0.13	1.39	0.05	0.56	0.05	0.09	0.04	0.04	0.11
4404699	55	1	70	160	27	15	174	85	1	1	0	0	0	0	0	0	1	1	0	0	0	1	1	0	1	13.78	1.53	0.16	0.08	0.81	0.13	0.16	0.12	0.07	0.05	0.08	0.15	0.05	0.04	0.05	0.03	0.82	0.08	0.49	0.05	0.06	0.05	0.03	0.10
4464045	58	1	55	160	21	4	210	150	0	1	0	0	0	0	0	0	1	0	0	0	0	0	0	0	0	12.69	1.38	0.24	0.11	0.35	0.13	0.20	0.03	0.09	0.06	0.04	0.05	0.05	0.07	0.06	0.03	1.18	0.05	0.59	0.07	0.08	0.04	0.03	0.16
4418520	58	1	65	160	25	8	137	82	0	0	0	0	0	0	0	0	1	0	0	0	0	0	0	0	0	9.70	0.92	0.15	0.05	0.71	0.07	0.21	0.02	0.09	0.02	0.03	0.04	0.02	0.05	0.02	0.04	0.70	0.06	0.57	0.05	0.05	0.04	0.03	0.03
4404899	71	1	35	158	14	8	134	73	0	0	0	0	0	0	0	0	1	1	0	0	0	0	0	0	0	18.62	2.18	0.22	0.22	1.16	0.13	0.36	0.24	0.08	0.06	0.08	0.12	0.06	0.07	0.13	0.16	1.02	0.09	0.58	0.08	0.19	0.10	0.05	0.15
4405885	62	1	67	167	24	6	155	90	1	0	心功能五级	0	0	1	0	0	0	1	0	0	0	1	0	0	1	15.90	2.24	0.47	0.13	0.79	0.30	0.51	0.07	0.05	0.06	0.04	0.06	0.03	0.06	0.05	0.08	1.04	0.08	0.55	0.06	0.12	0.07	0.07	0.06
4450369	38	1	60	160	23	0	115	61	0	0	0	0	0	0	0	0	0	0	0	0	0	0	0	0	0	9.81	2.00	0.31	0.10	0.47	0.20	0.22	0.11	0.00	0.06	0.11	0.14	0.06	0.04	0.09	0.04	0.81	0.03	0.43	0.05	0.07	0.07	0.02	0.06
4433839	42	1	100	175	33	10	120	90	0	0	0	0	0	0	0	0	1	0	0	0	0	0	0	0	0	22.51	4.68	0.49	0.09	0.68	0.21	0.27	0.06	0.09	0.05	0.07	0.11	0.05	0.09	0.04	0.03	1.52	0.13	0.82	0.08	0.08	0.09	0.06	0.07
4429506	63	1	80	163	30	0	150	90	1	0	心功能4级	0	1	0	0	0	0	1	0	0	0	0	0	0	0	14.51	1.11	0.28	0.12	0.84	0.19	0.25	0.08	0.10	0.05	0.11	0.16	0.09	0.07	0.06	0.04	0.96	0.06	0.64	0.07	0.11	0.09	0.04	0.14
4431511	65	1	65	158	26	20	171	110	0	1	0	0	0	0	0	0	1	0	0	0	0	0	1	0	0	12.60	1.48	0.28	0.07	1.04	0.35	0.27	0.09	0.10	0.04	0.07	0.08	0.04	0.07	0.05	0.04	1.46	0.05	0.58	0.06	0.09	0.05	0.03	0.12
4440560	37	1	70	180	22	0	135	86	0	1	0	0	0	0	0	0	0	0	0	0	0	0	0	0	0	7.15	1.41	0.68	0.10	0.84	0.19	0.59	0.04	0.08	0.04	0.03	0.06	0.04	0.07	0.04	0.02	0.33	0.03	0.21	0.05	0.09	0.08	0.03	0.08
4419071	50	1	90	168	32	15	126	87	1	0	0	0	0	0	0	0	0	1	0	0	1	0	0	0	1	14.36	1.61	0.16	0.18	0.96	0.16	0.40	0.07	0.11	0.05	0.05	0.11	0.05	0.08	0.06	0.04	1.05	0.10	0.42	0.06	0.08	0.08	0.05	0.08
4439280	65	1	70	170	24	10	162	81	0	1	0	0	0	0	0	0	0	1	0	0	0	0	1	0	0	15.47	0.93	0.30	0.20	0.44	0.15	0.24	0.05	0.09	0.07	0.12	0.15	0.03	0.03	0.03	0.02	0.54	0.04	0.40	0.04	0.07	0.05	0.03	0.12
4456025	80	1	55	160	21	15	155	69	1	1	0	0	0	0	0	0	1	1	0	0	1	0	0	1	0	9.28	1.00	0.17	0.20	0.36	0.14	0.34	0.08	0.11	0.05	0.10	0.14	0.07	0.11	0.08	0.04	1.50	0.08	0.73	0.05	0.04	0.04	0.02	0.16
4437059	53	1	73	170	25	1	127	82	0	1	0	0	1	0	0	0	0	1	0	0	0	0	1	0	0	7.37	0.91	0.13	0.06	0.82	0.07	0.18	0.04	0.00	0.08	0.20	0.28	0.05	0.03	0.02	0.02	0.42	0.02	0.29	0.03	0.04	0.04	0.02	0.08
4452303	73	1	51	150	23	0	148	76	1	0	0	0	0	0	0	0	0	0	0	0	0	0	0	0	0	9.78	0.96	0.21	0.06	0.59	0.15	0.22	0.03	0.06	0.03	0.06	0.08	0.08	0.09	0.08	0.03	0.92	0.04	0.35	0.03	0.03	0.02	0.01	0.10
4443564	86	1	95	178	30	4	150	80	0	1	0	0	0	0	0	0	0	1	0	0	0	0	1	0	0	21.85	3.10	0.38	0.30	0.90	0.12	0.21	0.08	0.12	0.06	0.14	0.26	0.13	0.15	0.11	0.04	1.38	0.05	0.63	0.08	0.07	0.07	0.05	0.17
4426014	69	1	65	170	22	10	176	98	0	0	0	1	0	0	0	0	1	1	0	0	0	0	1	0	0	8.82	1.02	0.10	0.07	1.36	0.11	0.51	0.12	0.07	0.04	0.02	0.07	0.03	0.04	0.04	0.05	0.93	0.05	0.56	0.05	0.09	0.02	0.04	0.10
4435072	72	1	70	160	27	1	130	80	1	0	0	1	0	1	0	0	0	1	0	0	0	0	0	0	0	12.57	1.42	0.49	0.11	0.53	0.55	0.30	0.09	0.07	0.06	0.10	0.13	0.06	0.08	0.06	0.04	1.11	0.08	0.49	0.05	0.11	0.09	0.04	0.13
4429234	34	1	85	168	30	1	145	80	0	0	0	0	0	0	0	0	1	0	0	0	0	0	0	0	0	11.18	2.21	0.37	0.14	0.93	0.24	0.33	0.07	0.09	0.07	0.10	0.13	0.06	0.05	0.05	0.03	0.96	0.06	0.57	0.07	0.07	0.07	0.05	0.07
4456878	48	1	65	160	25	5	170	100	0	0	0	0	0	0	0	0	0	0	0	0	0	0	0	0	0	14.68	0.43	0.19	0.84	0.44	0.14	0.51	0.04	0.14	0.04	0.08	0.15	0.10	0.08	0.06	0.03	1.27	0.05	0.73	0.08	0.10	0.08	0.02	0.21
4461050	53	1	76	165	28	6	130	77	0	0	0	0	0	0	0	0	1	0	0	0	0	0	0	0	0	12.27	1.64	0.20	0.09	0.92	0.09	0.25	0.08	0.10	0.05	0.07	0.10	0.08	0.06	0.09	0.06	0.99	0.06	0.60	0.06	0.08	0.11	0.07	0.10
4461170	79	1	60	160	23	1	120	70	0	0	1	0	0	0	0	0	0	0	0	0	0	0	0	0	0	24.53	5.18	0.55	0.27	0.70	0.23	0.43	0.16	0.13	0.07	0.12	0.24	0.18	0.17	0.14	0.10	1.51	0.10	0.78	0.07	0.08	0.12	0.08	0.19
4427026	58	1	85	174	28	3	114	82	0	0	0	0	0	0	0	0	0	0	0	0	0	0	0	0	0	12.91	2.42	0.18	0.14	0.92	0.16	0.28	0.07	0.07	0.04	0.09	0.16	0.07	0.07	0.03	0.07	1.52	0.08	0.62	0.06	0.12	0.08	0.05	0.12
4414180	74	1	45	160	18	6	130	80	0	1	0	0	0	0	0	0	1	0	0	0	0	0	0	0	0	10.16	0.46	0.34	0.09	0.62	0.12	0.10	0.10	0.04	0.05	0.07	0.12	0.05	0.04	0.05	0.05	0.62	0.05	0.42	0.04	0.08	0.05	0.04	0.12
4410600	50	1	74	160	29	0	130	76	0	0	0	0	0	0	0	0	0	0	0	0	0	0	0	0	0	12.36	2.19	0.25	0.09	1.05	0.13	0.16	0.10	0.06	0.05	0.08	0.11	0.03	0.04	0.03	0.06	0.92	0.04	0.34	0.03	0.10	0.04	0.04	0.08
4455165	47	1	70	170	24	4	118	67	1	0	心功能Ⅲ级	0	1	1	0	0	1	1	0	0	1	0	0	1	1	6.95	0.96	0.23	0.09	0.36	0.14	0.19	0.03	0.04	0.04	0.05	0.07	0.09	0.06	0.04	0.04	0.85	0.04	0.32	0.05	0.04	0.03	0.02	0.00
4424159	59	1	85	165	31	1	137	90	0	0	0	0	0	0	0	0	0	0	0	0	0	0	0	0	0	14.05	2.27	0.44	0.11	0.80	0.50	0.35	0.07	0.06	0.05	0.06	0.08	0.04	0.05	0.03	0.03	1.02	0.08	0.51	0.07	0.06	0.08	0.04	0.07
4381944	58	1	60	160	23	0	148	98	0	1	0	0	0	0	0	0	1	1	0	0	0	0	0	0	0	11.16	1.67	0.39	0.15	0.70	0.28	0.48	0.04	0.05	0.07	0.05	0.14	0.07	0.14	0.08	0.10	1.47	0.10	0.85	0.05	0.07	0.05	0.05	0.08
4450248	53	1	75	163	28	15	144	81	0	0	0	0	1	0	0	0	1	0	0	0	0	1	1	0	0	17.45	1.73	0.25	0.19	1.33	0.18	0.47	0.12	0.00	0.04	0.10	0.08	0.06	0.11	0.10	0.03	2.05	0.06	0.79	0.08	0.10	0.10	0.04	0.09
4444317	53	1	64	150	28	0	173	115	1	0	0	0	0	0	0	0	0	1	0	0	0	1	1	0	0	9.67	1.38	0.10	0.11	0.96	0.09	0.28	0.03	0.00	0.03	0.02	0.08	0.03	0.09	0.06	0.01	0.96	0.04	0.48	0.04	0.05	0.04	0.02	0.05
4405189	53	1	53	158	21	0	150	78	0	0	0	1	0	0	0	0	1	1	0	0	0	0	0	0	0	11.87	1.95	0.19	0.11	0.49	0.13	0.23	0.14	0.07	0.08	0.17	0.28	0.08	0.09	0.08	0.10	1.21	0.08	0.44	0.05	0.12	0.07	0.05	0.13
4388782	95	1	65	170	22	22	137	65	0	0	0	0	0	0	0	0	1	0	0	0	0	0	0	0	0	5.61	0.35	0.14	0.03	0.35	0.06	0.17	0.06	0.04	0.09	0.09	0.13	0.06	0.09	0.03	0.03	0.65	0.06	0.23	0.03	0.10	0.07	0.02	0.05
4415443	71	1	66	155	27	7	150	60	1	0	心功能3级	0	1	0	0	0	1	1	0	0	1	0	0	0	0	13.00	2.18	0.28	0.10	0.87	0.22	0.27	0.10	0.11	0.05	0.07	0.12	0.05	0.07	0.07	0.05	1.00	0.14	0.75	0.05	0.11	0.07	0.04	0.08
4419118	59	1	85	170	29	15	147	82	0	0	0	0	0	0	0	0	1	1	0	0	0	1	0	0	0	14.00	0.91	0.18	0.08	0.86	0.11	0.21	0.06	0.05	0.03	0.05	0.07	0.04	0.05	0.05	0.04	0.86	0.07	0.30	0.05	0.06	0.06	0.03	0.06
4448397	58	1	70	170	24	10	140	76	0	1	0	0	0	0	0	0	0	1	0	0	0	0	1	0	0	8.72	0.99	0.21	0.06	0.58	0.11	0.17	0.08	0.06	0.07	0.14	0.27	0.09	0.06	0.04	0.03	0.67	0.05	0.39	0.04	0.05	0.04	0.02	0.13
4456574	67	1	55	150	24	7	130	64	0	0	0	0	0	0	0	0	1	0	0	0	0	0	0	0	0	3.13	0.36	0.07	0.06	0.37	0.06	0.14	0.03	0.04	0.02	0.01	0.01	0.04	0.03	0.04	0.02	0.45	0.02	0.20	0.02	0.03	0.02	0.01	0.03
4411809	56	1	55	164	20	0	119	86	0	0	0	0	0	0	0	0	0	0	0	0	0	0	0	0	0	8.71	1.00	0.24	0.07	0.37	0.09	0.12	0.10	0.04	0.04	0.06	0.06	0.04	0.05	0.02	0.05	0.71	0.03	0.35	0.04	0.08	0.05	0.04	0.08
4406599	88	1	57	165	21	40	150	90	1	0	0	1	0	0	0	0	1	1	0	0	0	1	1	0	0	16.08	2.53	0.35	0.13	0.52	0.23	0.28	0.07	0.09	0.04	0.04	0.06	0.06	0.05	0.05	0.03	1.11	0.07	0.41	0.06	0.08	0.05	0.04	0.09
4412205	74	1	60	158	24	15	120	80	1	0	0	1	0	1	0	0	0	1	0	0	0	0	0	0	1	26.57	2.38	0.25	0.24	0.97	0.16	0.37	0.09	0.06	0.06	0.07	0.07	0.05	0.08	0.05	0.10	1.71	0.10	0.62	0.04	0.13	0.05	0.06	0.09
4444295	67	1	70	165	26	3	142	89	0	1	0	0	0	0	0	0	1	1	0	0	0	0	0	0	0	8.16	1.28	0.13	0.13	0.35	0.07	0.37	0.03	0.00	0.03	0.03	0.05	0.04	0.05	0.06	0.01	0.68	0.03	0.25	0.02	0.03	0.02	0.02	0.10
4406865	55	1	75	167	27	4	210	120	1	1	0	0	1	0	0	0	0	1	0	0	1	0	1	0	1	16.02	1.86	0.18	0.11	1.06	0.16	0.21	0.09	0.05	0.04	0.06	0.09	0.05	0.07	0.06	0.09	1.45	0.07	0.65	0.06	0.09	0.06	0.06	0.10
4465244	74	1	48	155	20	0	107	96	0	0	0	0	0	0	0	0	0	0	0	0	0	0	0	0	0	7.48	0.91	0.08	0.06	0.61	0.08	0.17	0.04	0.00	0.04	0.03	0.05	0.04	0.06	0.04	0.05	0.44	0.03	0.23	0.04	0.06	0.04	0.02	0.07
4466828	62	1	60	163	23	4	123	65	0	0	0	0	1	1	0	0	0	0	0	0	0	0	1	0	0	9.63	1.78	0.13	0.07	0.61	0.11	0.20	0.05	0.00	0.08	0.03	0.05	0.05	0.07	0.05	0.04	1.02	0.04	0.50	0.06	0.08	0.04	0.02	0.07
4442624	60	1	55	156	23	5	190	90	0	0	0	0	0	0	0	0	0	0	0	0	1	0	1	0	1	10.87	0.80	0.10	0.09	0.72	0.12	0.25	0.06	0.07	0.03	0.05	0.05	0.03	0.04	0.06	0.03	0.60	0.05	0.38	0.03	0.06	0.06	0.03	0.06
4431149	64	1	70	170	24	0	140	78	0	1	0	0	0	0	0	0	0	1	0	0	0	0	0	0	0	13.44	2.58	0.14	0.07	0.77	0.14	0.28	0.06	0.05	0.07	0.07	0.04	0.06	0.15	0.05	0.06	0.90	0.05	0.67	0.06	0.10	0.04	0.03	0.10
4459427	58	1	55	160	21	8	155	84	0	0	0	0	0	0	0	0	0	0	0	0	0	0	0	0	0	8.67	1.72	0.11	0.17	0.23	0.15	0.24	0.03	0.00	0.03	0.04	0.04	0.07	0.10	0.07	0.03	1.13	0.05	0.60	0.06	0.06	0.04	0.03	0.11
4403977	51	1	60	170	21	15	175	93	0	0	0	0	0	0	0	0	1	0	0	0	0	0	0	1	0	30.78	3.13	0.31	0.36	0.72	0.18	0.25	0.17	0.07	0.08	0.09	0.10	0.06	0.12	0.09	0.13	1.50	0.13	0.76	0.06	0.15	0.13	0.11	0.15
4461655	75	1	73	161	28	26	160	80	0	1	0	0	0	0	0	0	1	0	0	0	0	0	0	0	0	7.32	0.74	0.10	0.08	0.42	0.08	0.17	0.05	0.03	0.04	0.03	0.04	0.06	0.04	0.04	0.04	0.48	0.04	0.33	0.02	0.06	0.04	0.02	0.06
4461874	45	1	56	160	22	16	102	62	0	0	0	0	0	0	0	0	1	0	0	0	0	0	0	0	0	10.82	1.15	0.09	0.08	0.45	0.07	0.21	0.02	0.07	0.02	0.02	0.02	0.03	0.05	0.04	0.02	0.68	0.04	0.64	0.05	0.08	0.03	0.02	0.06
4390477	78	1	60	155	25	20	147	80	0	0	0	0	0	0	0	0	0	0	0	0	0	0	0	0	0	10.96	0.71	0.16	0.08	0.73	0.18	0.23	0.13	0.05	0.06	0.05	0.09	0.06	0.08	0.06	0.05	0.77	0.08	0.53	0.04	0.09	0.06	0.03	0.12
4415989	72	1	65	162	25	10	150	94	1	0	0	1	0	0	0	0	0	1	0	0	0	1	1	0	1	29.06	2.41	0.27	0.27	1.14	0.14	0.29	0.13	0.08	0.07	0.09	0.10	0.05	0.12	0.08	0.07	2.00	0.10	0.90	0.06	0.10	0.08	0.04	0.14
4451920	47	1	82	178	26	3	122	71	0	1	0	0	0	1	0	0	0	0	0	0	0	0	0	0	0	9.95	1.39	0.20	0.08	0.53	0.32	0.39	0.06	0.09	0.03	0.07	0.08	0.07	0.12	0.08	0.04	1.06	0.05	0.36	0.04	0.05	0.03	0.03	0.09
4403604	60	1	60	115	45	12	117	76	1	1	0	0	0	0	0	0	0	0	0	0	0	0	0	0	0	6.85	0.80	0.09	0.07	0.51	0.10	0.14	0.07	0.05	0.03	0.02	0.03	0.03	0.02	0.04	0.05	0.26	0.03	0.18	0.03	0.11	0.05	0.03	0.06
4412100	63	1	65	155	27	8	154	94	0	0	0	0	1	0	0	0	0	0	0	0	0	1	0	0	0	13.86	1.34	0.16	0.12	0.94	0.16	0.19	0.08	0.05	0.04	0.05	0.06	0.04	0.05	0.03	0.05	1.01	0.06	0.49	0.04	0.08	0.06	0.04	0.05
4442927	52	1	70	155	29	0	166	80	0	0	0	0	1	0	0	0	0	0	0	0	0	0	0	0	0	9.82	0.86	0.19	0.05	1.28	0.15	0.32	0.04	0.08	0.02	0.05	0.07	0.06	0.07	0.05	0.02	0.77	0.02	0.33	0.05	0.08	0.07	0.03	0.07
4450857	65	1	63	158	25	9	140	82	0	0	0	0	0	0	0	0	1	0	0	0	0	0	0	0	0	9.55	0.92	0.20	0.06	1.09	0.16	0.47	0.00	0.07	0.05	0.04	0.08	0.05	0.09	0.02	0.04	1.05	0.03	0.52	0.06	0.09	0.05	0.03	0.06
4410206	51	1	61	172	21	1	103	65	0	0	0	0	0	0	0	0	0	0	0	0	0	0	0	0	0	39.01	2.55	0.18	0.25	0.25	0.09	0.10	0.14	0.05	0.05	0.05	0.07	0.05	0.12	0.03	0.05	2.48	0.08	0.88	0.09	0.07	0.06	0.07	0.15
4403984	60	1	68	158	27	3	121	80	1	0	0	0	1	0	0	0	1	0	0	0	0	0	0	0	0	16.84	0.97	0.12	0.10	0.65	0.12	0.19	0.10	0.04	0.05	0.06	0.10	0.06	0.07	0.11	0.11	0.85	0.07	0.41	0.06	0.16	0.07	0.04	0.14
4425455	60	1	65	164	24	4	155	70	1	0	0	1	0	0	0	0	1	1	0	0	1	0	0	0	0	15.43	1.36	0.27	0.08	0.97	0.18	0.30	0.07	0.05	0.08	0.08	0.12	0.05	0.06	0.04	0.04	0.76	0.06	0.28	0.05	0.08	0.08	0.05	0.11
4424952	59	1	50	156	21	2	143	75	1	0	0	0	0	0	0	0	0	1	0	0	0	0	0	0	1	9.71	0.95	0.19	0.06	0.62	0.14	0.16	0.07	0.05	0.07	0.05	0.07	0.04	0.04	0.05	0.05	0.49	0.03	0.33	0.06	0.09	0.04	0.03	0.09
4416755	66	1	65	155	27	6	120	80	0	0	0	0	1	0	0	0	0	0	0	0	0	0	1	0	0	13.36	0.69	0.11	0.17	0.42	0.14	0.12	0.08	0.00	0.02	0.05	0.09	0.07	0.05	0.05	0.02	0.30	0.03	0.21	0.03	0.11	0.06	0.03	0.08
4427208	53	1	55	156	23	0	119	85	0	0	0	0	0	0	0	0	0	0	0	0	0	0	0	0	0	6.93	0.96	0.14	0.04	0.90	0.11	0.47	0.05	0.08	0.03	0.04	0.04	0.04	0.04	0.04	0.03	0.64	0.04	0.39	0.03	0.11	0.08	0.04	0.03
4434051	61	1	73	168	26	5	198	86	0	0	0	0	0	0	0	0	1	0	0	0	0	1	1	0	0	9.83	0.89	0.17	0.09	0.64	0.12	0.30	0.06	0.08	0.03	0.04	0.05	0.05	0.06	0.04	0.03	1.07	0.08	0.61	0.06	0.08	0.06	0.04	0.05
4412357	43	1	60	160	23	0	150	101	0	0	0	0	1	0	0	0	0	0	0	0	1	0	0	0	0	15.41	1.34	0.19	0.28	0.46	0.14	0.39	0.10	0.04	0.03	0.03	0.04	0.04	0.07	0.06	0.07	1.60	0.04	0.63	0.04	0.13	0.07	0.07	0.07
4425294	76	1	60	155	25	30	140	70	1	0	0	1	0	0	0	0	1	1	0	0	0	1	1	0	0	15.92	1.54	0.20	0.08	1.58	0.11	0.22	0.07	0.06	0.06	0.08	0.11	0.07	0.06	0.05	0.04	0.94	0.04	0.38	0.05	0.10	0.06	0.03	0.11
4415509	85	1	71	170	25	10	137	75	1	1	0	0	0	0	0	0	1	0	0	0	0	0	0	0	0	10.40	0.46	0.15	0.17	0.77	0.11	0.19	0.08	0.07	0.04	0.08	0.11	0.12	0.08	0.07	0.04	0.76	0.05	0.39	0.05	0.05	0.03	0.02	0.08
4440474	58	1	65	160	25	0	144	97	0	0	0	1	0	1	0	0	1	1	0	0	0	0	0	0	0	10.05	1.28	0.16	0.13	0.56	0.13	0.38	0.05	0.00	0.05	0.04	0.06	0.06	0.07	0.03	0.02	0.61	0.03	0.32	0.05	0.09	0.05	0.02	0.03
4408068	53	1	70	180	22	0	130	80	0	0	0	0	0	0	0	0	1	0	0	0	0	0	0	0	0	9.53	1.29	0.13	0.12	0.46	0.10	0.75	0.12	0.05	0.04	0.06	0.08	0.04	0.08	0.05	0.10	1.13	0.08	0.60	0.04	0.12	0.07	0.05	0.07
4408215	66	1	72	161	28	1	200	100	0	1	0	0	0	0	0	0	1	0	0	0	0	0	1	0	0	22.98	2.96	0.19	0.20	1.02	0.29	0.38	0.12	0.05	0.08	0.11	0.19	0.06	0.10	0.05	0.09	1.84	0.06	0.59	0.05	0.15	0.06	0.05	0.16
4411561	79	1	51	157	21	10	169	82	0	1	0	1	1	0	0	0	0	0	0	0	0	0	0	0	0	16.89	1.48	0.30	0.13	0.81	0.15	0.31	0.10	0.06	0.05	0.07	0.08	0.05	0.05	0.04	0.06	0.58	0.05	0.34	0.03	0.07	0.04	0.03	0.06
4442300	53	1	81	163	30	3	164	108	0	0	0	0	0	0	0	0	1	0	0	0	0	0	1	0	0	12.58	1.20	0.23	0.07	0.59	0.15	0.29	0.09	0.08	0.07	0.15	0.17	0.05	0.06	0.04	0.03	0.52	0.05	0.27	0.03	0.07	0.04	0.03	0.11
4404642	65	1	62	158	25	0	120	80	1	0	0	0	0	0	0	0	0	0	0	0	0	0	0	0	0	10.49	0.90	0.22	0.10	0.97	0.12	0.19	0.04	0.05	0.03	0.07	0.07	0.03	0.04	0.04	0.02	0.68	0.03	0.57	0.04	0.07	0.03	0.02	0.08
4444503	69	1	70	160	27	3	130	80	0	0	0	0	1	0	0	0	0	0	0	0	0	0	0	0	0	13.24	1.60	0.15	0.23	0.51	0.21	0.26	0.07	0.00	0.04	0.05	0.07	0.03	0.12	0.11	0.04	0.71	0.05	0.30	0.05	0.04	0.04	0.02	0.08
4447330	61	1	60	153	26	4	171	83	0	0	0	0	1	0	0	0	0	0	0	0	0	1	1	0	0	22.80	3.17	0.26	0.15	1.11	0.16	0.36	0.10	0.10	0.07	0.08	0.17	0.09	0.09	0.05	0.05	1.28	0.08	0.47	0.05	0.10	0.07	0.04	0.17
4458557	45	1	72	170	25	2	122	75	0	0	0	0	0	0	0	0	1	0	0	0	0	0	0	0	0	5.59	1.81	0.15	0.07	0.29	0.17	0.08	0.00	0.00	0.03	0.02	0.04	0.05	0.04	0.07	0.03	0.58	0.04	0.19	0.03	0.03	0.03	0.02	0.05
4419645	50	1	83	164	31	0	174	114	0	0	0	0	0	0	0	0	0	0	0	0	0	0	1	0	0	16.31	1.72	0.18	0.10	0.99	0.11	0.22	0.05	0.05	0.06	0.10	0.14	0.04	0.05	0.04	0.05	1.07	0.08	0.65	0.04	0.06	0.04	0.05	0.07
4466822	65	1	72	160	28	0	106	66	0	0	0	0	0	0	0	0	0	0	0	0	0	0	0	0	0	9.09	1.74	0.12	0.10	0.43	0.09	0.26	0.03	0.06	0.06	0.08	0.05	0.04	0.06	0.04	0.04	0.78	0.04	0.35	0.04	0.04	0.04	0.02	0.09
4357712	52	1	48	158	19	20	81	49	0	0	0	1	0	0	0	0	1	0	0	0	0	0	0	0	0	6.68	0.31	0.09	0.11	0.24	0.06	0.11	0.05	0.02	0.04	0.04	0.05	0.02	0.03	0.02	0.02	0.63	0.04	0.37	0.04	0.05	0.05	0.03	0.05
4457689	66	1	60	150	27	3	101	62	0	1	0	0	0	0	0	0	1	0	0	0	0	0	0	0	0	6.79	0.38	0.07	0.08	0.24	0.06	0.21	0.03	0.05	0.04	0.07	0.12	0.09	0.12	0.12	0.03	1.27	0.05	0.38	0.03	0.05	0.04	0.02	0.12
4408553	50	1	74	160	29	0	137	88	0	0	0	0	0	0	0	0	1	0	0	0	0	0	0	0	0	16.66	1.53	0.15	0.14	0.76	0.12	0.46	0.08	0.06	0.05	0.08	0.07	0.06	0.07	0.05	0.09	1.20	0.06	0.50	0.05	0.18	0.08	0.06	0.06
4453917	30	1	55	175	18	6	93	62	0	0	0	0	0	0	0	0	0	0	0	0	0	0	0	0	0	10.11	0.75	0.23	0.20	0.36	0.14	0.23	0.06	0.07	0.02	0.02	0.04	0.04	0.06	0.04	0.02	0.59	0.03	0.37	0.04	0.05	0.05	0.01	0.09
4411881	39	1	55	158	22	1	112	73	0	0	0	0	1	0	0	0	0	0	0	0	0	0	0	0	0	14.90	1.32	0.20	0.24	0.82	0.18	0.33	0.10	0.07	0.04	0.05	0.06	0.04	0.06	0.04	0.08	1.13	0.08	0.48	0.04	0.14	0.09	0.05	0.09
4446982	64	1	55	170	19	4	125	79	0	0	0	0	0	0	0	0	1	0	0	0	0	0	0	0	0	20.16	2.33	0.23	0.12	0.42	0.12	0.21	0.10	0.07	0.06	0.05	0.08	0.05	0.07	0.06	0.05	1.42	0.10	0.74	0.06	0.08	0.06	0.04	0.10
4428232	34	1	60	166	22	0	112	64	0	0	0	0	0	0	0	0	1	0	0	0	0	0	0	0	0	9.23	0.26	0.31	0.26	0.49	0.15	0.38	0.08	0.07	0.07	0.10	0.17	0.06	0.03	0.04	0.08	0.46	0.08	0.34	0.19	0.08	0.09	0.03	0.13
4424658	48	1	67	163	25	16	166	91	0	0	0	0	1	1	0	0	1	0	0	0	0	0	0	0	0	11.75	1.20	0.24	0.11	0.83	0.17	0.28	0.04	0.07	0.03	0.03	0.04	0.03	0.04	0.04	0.05	1.01	0.06	0.43	0.05	0.06	0.04	0.04	0.05
4425910	52	1	70	165	26	20	120	74	0	0	0	0	1	0	0	0	1	1	0	0	0	0	0	0	0	14.89	0.86	0.20	0.20	0.61	0.20	0.25	0.04	0.05	0.03	0.03	0.05	0.05	0.05	0.06	0.05	0.83	0.05	0.36	0.04	0.08	0.06	0.03	0.06
4278849	68	1	60	161	23	15	163	62	0	0	0	1	0	0	0	0	1	1	0	0	0	0	0	0	0	11.10	1.23	0.19	0.07	1.07	0.19	0.35	0.11	0.09	0.07	0.08	0.09	0.14	0.17	0.03	0.02	1.28	0.08	0.60	0.06	0.09	0.05	0.03	0.08
4412818	77	1	55	155	23	5	166	79	1	1	心功能3级	0	0	0	0	0	0	0	0	0	0	0	0	0	0	15.80	2.90	0.31	0.09	0.65	0.14	0.21	0.09	0.04	0.06	0.12	0.16	0.07	0.09	0.05	0.05	1.21	0.05	0.37	0.08	0.06	0.05	0.05	0.14
4425550	46	1	72	180	22	10	111	77	0	0	0	1	0	0	0	0	1	0	0	0	0	0	0	0	0	10.81	1.67	0.12	0.11	0.79	0.15	0.26	0.07	0.05	0.04	0.05	0.05	0.05	0.05	0.03	0.04	0.93	0.05	0.43	0.05	0.06	0.08	0.06	0.07
[truncated: 5 more columns]
